# Supplementary material for: Determination of the Surface Roughness Parameter and Wind Shear Exponent of Kisii Region from the On-Site Measurement of Wind Profiles
Source: Hindawi journal article supplement (doi:10.1155/2019/8264061), 2019-07-01
Supplement: f1 [file 8264061.f1.zip]

Archive with 14 entries (13 files):
- 8264061.f1/
- 8264061.f1/2months analysis shear.xlsx
- 8264061.f1/4months analysis.xlsx
- 8264061.f1/4months Z analysis.xlsx
- 8264061.f1/8264061_SupplDesc.docx
- 8264061.f1/Kisii analys  B 10M .xlsx
- 8264061.f1/Kisii analysis A 13M.xlsx
- 8264061.f1/Kisii B(Autosaved).xlsx
- 8264061.f1/Nyamecheo A .xlsx
- 8264061.f1/NYAMECHEO A ANALYSIS 2.xlsx
- 8264061.f1/NYAMECHEO B ANALYSIS 2.xlsx
- 8264061.f1/~$2months analysis.xlsx
- 8264061.f1/~$4months analysis.xlsx
- 8264061.f1/~$4months Z analysis.xlsx
