# Supplementary material for: Determination of the Surface Roughness Parameter and Wind Shear Exponent of Kisii Region from the On-Site Measurement of Wind Profiles
Source: Hindawi journal article supplement (doi:10.1155/2019/8264061), 2019-07-01
Supplement: f1 [file 8264061.f1.zip › 8264061.f1/2months analysis shear.xlsx]

## Sheet: Sheet1
	IKOBE		KSU		NYAMS		Feb
	10m	13m	10m	13m	10m	13m	Ikobe	KSU	Nyams
0	1.66191	1.91852	2.81967	3.02924	1.01234	1.47271	0.5546	0.2738	1.4305			0	1.01234	1.47271	0.420439	0.661569
1	1.62432	1.88232	3.02162	3.26739	0.827155	1.27647	0.5673	0.3031	1.6511			1	0.827155	1.27647	0.355032	0.630994
2	1.4362	1.75468	3.14165	3.45029	0.635798	1.08977	0.7431	0.3809	2.0295			2	0.635798	1.08977	0.330393	0.526948
3	1.48147	1.72229	3.4522	3.68844	0.689296	1.12977	0.5728	0.2563	1.8801			3	0.689296	1.12977	0.3734	0.668513
4	1.53703	1.76992	3.82371	4.11139	0.685181	1.13359	0.5305	0.2789	1.8801			4	0.685181	1.13359	0.445638	0.716672
5	1.49588	1.8004	4.0428	4.34763	0.808637	1.25933	0.6949	0.2818	1.684			5	0.808637	1.25933	0.389863	0.770767
6	1.50411	1.80612	4.21236	4.56101	0.71193	1.11263	0.716	0.3044	1.7032			6	0.71193	1.11263	0.409463	0.855101
7	1.56172	1.87089	4.3362	4.68485	0.745263	1.15835	0.6908	0.2875	1.509			7	0.745263	1.15835	0.46871	0.782078
8	1.87653	2.08237	4.29048	4.5915	1.41262	1.70133	0.3853	0.2576	0.7129			8	1.41262	1.70133	0.790142	1.01593
9	2.27982	2.26336	3.70177	4.25428	2.39291	2.56628	0.0336	0.5282	0.2768			9	2.39291	2.56628	1.20353	1.43816
10	2.2505	2.51675	2.87492	3.16451	2.47674	2.78062	0.4168	0.3669	0.4352			10	2.47674	2.78062	1.6514	1.91639
11	2.46055	2.55866	2.48817	2.68631	2.45769	2.76442	0.1519	0.2945	0.4386			11	2.45769	2.76442	1.88301	2.10118
12	2.60629	2.72823	2.31861	2.52437	2.30718	2.572	0.186	0.3152	0.4065			12	2.30718	2.572	1.93789	2.18496
13	2.62344	2.70536	2.31847	2.56281	2.40244	2.80824	0.1287	0.3752	0.6011			13	2.40244	2.80824	2.07453	2.31488
14	2.37481	2.60058	2.41401	2.66937	2.39101	2.82882	0.353	0.3905	0.6441			14	2.39101	2.82882	2.01293	2.3095
15	2.27622	2.49198	2.28357	2.52056	2.23764	2.6082	0.3511	0.3815	0.5827			15	2.23764	2.6082	1.95436	2.38454
16	2.2998	2.56649	2.14064	2.41401	2.43549	2.85778	0.4231	0.4529	0.6054			16	2.43549	2.85778	1.50838	1.85849
17	2.18818	2.45075	2.16048	2.49668	2.0576	2.41577	0.4276	0.5572	0.6139			17	2.0576	2.41577	1.41173	1.72331
18	1.66894	2.01535	1.57076	1.85735	1.47395	1.74896	0.7252	0.6461	0.6645			18	1.47395	1.74896	0.956309	1.4292
19	1.65751	2.07046	1.42562	1.66629	0.886351	1.22537	0.8413	0.5914	1.2332			19	0.886351	1.22537	1.00484	1.43592
20	1.83088	2.27071	1.71222	1.94002	1.14157	1.47063	0.8212	0.481	0.969			20	1.14157	1.47063	0.784878	1.23623
21	1.59662	2.08883	1.94737	2.14211	1.22665	1.63322	1.0183	0.3544	1.0732			21	1.22665	1.63322	0.736832	1.12983
22	1.55082	1.93635	2.2652	2.47279	1.04661	1.41644	0.8554	0.3218	1.187			22	1.04661	1.41644	0.583507	0.875708
23	1.6156	1.96574	2.33317	2.5867	1.102	1.33285	0.7456	0.4032	0.7237			23	1.102	1.33285	0.316729	0.709168
							March
		IKOBE		KSU		NYAMS	Ikobe	KSU	Nyams
0	1.18034	1.38776	2.20153	2.34724	0.420439	0.661569	0.6243	0.2514	1.7227
1	1.12389	1.27789	2.34993	2.6306	0.355032	0.630994	0.509	0.4291	2.133
2	0.991626	1.28764	2.2227	2.46238	0.330393	0.526948	1.0089	0.3913	1.8058
3	0.81579	1.02187	2.58501	2.77586	0.3734	0.668513	0.8319	0.2698	2.2632
4	0.87358	1.12266	2.98585	3.2103	0.445638	0.716672	0.9627	0.2834	1.7914
5	0.934843	1.08089	2.93803	3.18924	0.389863	0.770767	0.5699	0.3111	2.5927
6	0.970906	1.20812	2.95125	3.18342	0.409463	0.855101	0.8426	0.2862	2.8235
7	0.951419	1.14361	3.22295	3.54091	0.46871	0.782078	0.6949	0.3611	1.9308
8	1.22167	1.20465	2.85314	3.12921	0.790142	1.01593	-0.063	0.3572	0.9739
9	1.54422	1.57995	2.19168	2.48086	1.20353	1.43816	0.0977	0.474	0.6949
10	1.84997	1.96231	2.00016	2.12493	1.6514	1.91639	0.22	0.2221	0.5776
11	2.00274	2.16043	1.98684	2.1387	1.88301	2.10118	0.2933	0.277	0.4218
12	2.04608	2.26112	2.01226	2.25563	1.93789	2.18496	0.3717	0.4468	0.4446
13	2.10858	2.37771	1.99188	2.20198	2.07453	2.31488	0.4409	0.3824	0.4181
14	2.26638	2.4654	1.95973	2.1844	2.01293	2.3095	0.3218	0.4055	0.5302
15	2.12918	2.36304	2.21721	2.54302	1.95436	2.38454	0.3908	0.5132	0.7595
16	1.70315	2.05717	1.70023	2.00498	1.50838	1.85849	0.7321	0.6194	0.7946
17	1.74593	2.18216	1.81873	2.2376	1.41173	1.72331	0.8374	0.7914	0.7575
18	1.65723	2.07307	2.1172	2.45775	0.956309	1.4292	0.8413	0.5669	1.5189
19	1.42942	1.76015	2.29774	2.55197	1.00484	1.43592	0.8182	0.3933	1.3898
20	1.41632	1.65812	1.99053	2.39652	0.784878	1.23623	0.5952	0.714	1.7669
21	1.28573	1.45104	2.01147	2.29886	0.736832	1.12983	0.4456	0.5137	1.6135
22	1.1389	1.31989	2.00968	2.33649	0.583507	0.875708	0.5588	0.5794	1.589
23	1.13487	1.27543	1.99199	2.25373	0.316729	0.709168	0.4751	0.468	3.0375
