# Supplementary material for: Determination of the Surface Roughness Parameter and Wind Shear Exponent of Kisii Region from the On-Site Measurement of Wind Profiles
Source: Hindawi journal article supplement (doi:10.1155/2019/8264061), 2019-07-01
Supplement: f1 [file 8264061.f1.zip › 8264061.f1/4months analysis.xlsx]

## Sheet: Sheet1
			NYAMECHEO
			APRL		MAY		JUNE		JULY		SHEAR FACTOR
			10	13	10	13	10	13	10	13	APL	MAY	JUNE	JULY
		0	0.391633	0.604982	0.831005	1.09109	0.623878	0.904569	1.21899	1.55299	1.6541	1.0376	1.4171	0.923			0.391633	1.01	-0.618367	0.382378
		1	0.357608	0.64109	0.777711	0.887944	0.49782	0.841407	1.15094	1.46434	2.2202	0.5041	1.9972	0.9168			0.357608	1.01	-0.652392	0.425615
		2	0.359691	0.626508	0.94662	1.04036	0.484867	0.776375	1.08521	1.40069	2.1148	0.707	1.7914	0.9742			0.359691	1.01	-0.650309	0.422902
		3	0.433643	0.67633	0.710008	0.912942	0.560983	0.778245	1.10766	1.47302	1.6891	0.9585	1.2464	1.0853			0.433643	1.01	-0.576357	0.332187
		4	0.435205	0.717994	0.564882	0.736395	0.446276	0.685838	1.16414	1.44501	1.91	1.0098	1.6411	0.8242			0.435205	1.01	-0.574795	0.330389
		5	0.549258	0.841941	0.849927	1.00859	0.615732	0.896691	1.07699	1.44964	1.6301	0.6536	1.4324	1.1335			0.549258	1.01	-0.460742	0.212283
		6	0.467494	0.702023	0.982207	1.30996	0.723629	0.819774	1.03243	1.44744	1.5536	1.0984	0.4746	1.2883			0.467494	1.01	-0.542506	0.294312
		7	0.660707	0.883778	1.01172	1.18549	1.05319	1.26365	1.18774	1.56468	1.08	0.6015	0.6961	1.0505			0.660707	1.01	-0.349293	0.122006
		8	1.02248	1.20788	1.50647	1.62143	1.49172	1.70445	1.97402	2.24714	0.6373	0.2805	0.5064	0.4937			1.02248	1.01	0.0124811	0.000155778
		9	1.61236	1.82068	2.03308	2.16374	1.75399	1.93199	2.42525	2.68426	0.4647	0.238	0.3684	0.3868			1.61236	1.01	0.602361	0.362838
		10	2.02743	2.17169	2.09869	2.34537	1.63065	1.76489	2.63936	2.88945	0.2633	0.4224	0.3009	0.3463			2.02743	1.01	1.01743	1.03516
		11	2.08315	2.21891	2.03637	2.14839	1.58487	1.85979	2.5021	2.60163	0.2411	0.2041	0.6098	0.1494			2.08315	1.01	1.07315	1.15166
		12	2.05352	2.45415	1.80479	2.0579	1.73493	1.97642	2.01128	2.30698	0.6782	0.5	0.4958	0.5234			2.05352	1.01	1.04352	1.08893
		13	2.27328	2.59849	1.69864	1.80141	1.55156	1.80746	1.80586	2.07378	0.5094	0.2222	0.5798	0.5274			2.27328	1.01	1.26328	1.59588
		14	2.15441	2.47118	1.66739	1.81477	1.46901	1.80759	1.62498	1.87669	0.5233	0.3242	0.7893	0.5495			2.15441	1.01	1.14441	1.30968
		15	1.91915	2.25361	1.72502	1.88439	1.56847	1.89724	1.56688	1.78306	0.6133	0.3361	0.726	0.4922			1.91915	1.01	0.909146	0.826547
		16	1.42299	1.77266	1.30735	1.59865	1.32641	1.47877	1.45809	1.66212	0.8382	0.7986	0.6656	0.4991			1.42299	1.01	0.412992	0.170562
		17	1.16136	1.51063	1.1841	1.50751	1.03744	1.31786	1.1661	1.54119	1.0043	0.9219	0.9139	1.0628			1.16136	1.01	0.151358	0.0229092
		18	0.560542	0.866418	0.816075	0.997136	0.880132	1.1874	1.12849	1.4692	1.6548	0.7636	1.1406	1.0068			0.560542	1.01	-0.449458	0.202013
		19	0.430866	0.680844	0.804444	1.02127	0.46684	0.734312	1.26147	1.56665	1.7436	0.9107	1.7235	0.8281			0.430866	1.01	-0.579134	0.335397
		20	0.471661	0.833956	0.807916	1.05112	0.590093	0.88761	1.3058	1.66592	2.1697	1.0022	1.5583	0.9279			0.471661	1.01	-0.538339	0.289809
		21	0.450482	0.79264	0.619217	0.933947	0.79734	1.09419	1.29622	1.70052	2.1595	1.5679	1.2073	1.0365			0.450482	1.01	-0.559518	0.31306
		22	0.417325	0.729798	0.639354	0.887423	0.59263	0.859701	1.36387	1.70064	2.1343	1.2499	1.4169	0.8416			0.417325	1.01	-0.592675	0.351264
		23	0.490235	0.739519	0.523045	0.640396	0.719222	1.01931	1.19781	1.56308	1.5713	0.7768	1.3291	1.0137			0.490235	1.01	-0.519765	0.270155
					KISII UNIVERSITY
			APRL		MAY		JUNE		JULY		SHEAR VALUE
			10	13	10	13	10	13	10	13	APRL	MAY	JUNE	JULY
		0	2.35519	2.64418	3.25423	3.65889	3.15618	3.36103	4.39464	4.62011	0.4412	0.4471	0.2399	0.1903
		1	2.33762	2.67808	3.4865	3.89029	3.15516	3.50419	4.61439	4.78288	0.5172	0.4169	0.3999	0.1371
		2	2.22775	2.50142	3.52817	3.90713	2.98381	3.2969	4.52494	4.75551	0.4406	0.3889	0.3802	0.1898
		3	2.46568	2.7371	3.36707	3.70454	3.09491	3.35265	4.81249	5.04552	0.3974	0.3646	0.3052	0.181
		4	2.3509	2.60598	3.54049	3.80662	3.4468	3.68861	4.89847	5.16418	0.3925	0.2772	0.2586	0.2016
		5	2.34314	2.70749	3.53806	3.9007	3.48989	3.72047	4.89255	5.09842	0.5504	0.3723	0.2433	0.1564
		6	2.75344	3.00771	3.97882	4.40726	3.59078	3.84281	5.10842	5.29121	0.3376	0.3894	0.2585	0.1342
		7	2.86515	3.19703	4.1361	4.56627	3.74947	4.00905	5.13702	5.29489	0.4179	0.377	0.2556	0.1155
		8	2.6311	3.02711	4.10329	4.46698	3.25094	3.48377	4.70813	4.98548	0.5344	0.324	0.2638	0.2179
		9	2.55391	2.83983	3.80818	4.17447	2.0176	2.40563	3.61652	4.00721	0.4046	0.3498	0.6703	0.3931
		10	2.31039	2.56051	2.79069	3.07009	1.89301	2.06784	2.79354	3.19853	0.3932	0.3632	0.337	0.5159
		11	2.0569	2.32467	2.07566	2.33971	1.6798	1.78314	2.03932	2.47092	0.4668	0.4563	0.2268	0.7324
		12	1.77893	2.13523	1.89768	2.19097	1.38121	1.66856	1.95014	2.02218	0.6956	0.5472	0.722	0.1382
		13	1.62491	1.92753	1.65867	1.74455	1.28216	1.58136	1.5542	1.99309	0.6517	0.1926	0.799	0.9483
		14	1.6655	1.97164	1.40686	1.67511	1.48782	1.75802	1.56134	1.81418	0.6427	0.6645	0.6355	0.5725
		15	1.70757	1.95755	1.47995	1.93843	1.13532	1.50291	1.62466	1.91364	0.5207	1.0276	1.0704	0.6239
		16	1.29401	1.6463	1.15987	1.53733	1.25901	1.57321	1.64324	2.06784	0.9171	1.0726	0.8487	0.8769
		17	1.20762	1.47516	1.27767	1.55156	1.5884	1.80931	1.44105	1.78114	0.7611	0.7404	0.4966	0.8074
		18	1.0473	1.32832	1.65225	1.92036	1.17269	1.52565	2.13911	2.23133	0.9062	0.573	1.0027	0.1605
		19	1.35793	1.6316	1.71038	1.9938	0.905763	1.1684	2.27799	2.67916	0.7005	0.5856	0.9682	0.618
		20	1.43247	1.74433	1.84725	2.08535	1.49007	1.66101	2.7855	3.15735	0.7513	0.462	0.4141	0.4765
		21	1.61608	1.90956	1.9123	2.30938	2.25021	2.50244	3.35898	3.71181	0.6371	0.7191	0.4046	0.3809
		22	1.6557	1.98083	2.18786	2.51806	2.85862	3.10002	3.74212	4.0017	0.683	0.5354	0.3085	0.2541
		23	2.05926	2.33742	3.09202	3.46735	3.03732	3.34571	4.37442	4.50925	0.4827	0.4363	0.3693	0.1159
