# Supplementary material for: Determination of the Surface Roughness Parameter and Wind Shear Exponent of Kisii Region from the On-Site Measurement of Wind Profiles
Source: Hindawi journal article supplement (doi:10.1155/2019/8264061), 2019-07-01
Supplement: f1 [file 8264061.f1.zip › 8264061.f1/4months Z analysis.xlsx]

## Sheet: Sheet1
		NYAMECHEO									SHEAR FACTOR
		APRL		MAY		JUNE		JULY		APL	MAY	JUNE	JULY	APL	MAY	JUNE	JULY
		10	13	10	13	10	13	10	13	ln Z	ln Z	ln Z	ln Z	Z	Z	Z	Z
	0	0.391633	0.604982	0.831005	1.09109	0.623878	0.904569	1.21899	1.55299	1.8153	1.465	1.7417	1.3326	6.1429	4.3275	5.707	3.7909
	1	0.357608	0.64109	0.777711	0.887944	0.49782	0.841407	1.15094	1.46434	1.9653	0.4422	1.9168	1.3293	7.1371	1.5561	6.7992	3.7784
	2	0.359691	0.626508	0.94662	1.04036	0.484867	0.776375	1.08521	1.40069	1.9528	-0.4668	1.8828	1.3801	7.0484	0.627	6.5719	3.9753
	3	0.433643	0.67633	0.710008	0.912942	0.560983	0.778245	1.10766	1.47302	1.8216	1.3712	1.6347	1.4936	6.1817	3.9401	5.1279	4.4531
	4	0.435205	0.717994	0.564882	0.736395	0.446276	0.685838	1.16414	1.44501	1.8903	1.4863	1.8107	1.2531	6.6214	4.4207	6.1147	3.5012
	5	0.549258	0.841941	0.849927	1.00859	0.615732	0.896691	1.07699	1.44964	1.805	0.9088	1.7216	1.5368	6.08	2.4813	5.5935	4.6497
	6	0.467494	0.702023	0.982207	1.30996	0.723629	0.819774	1.03243	1.44744	1.7664	1.5234	0.4136	1.6592	5.8498	4.5878	1.5123	5.2551
	7	0.660707	0.883778	1.01172	1.18549	1.05319	1.26365	1.18774	1.56468	1.5155	0.8304	0.9908	1.4588	4.5517	2.2942	2.6934	4.3008
	8	1.02248	1.20788	1.50647	1.62143	1.49172	1.70445	1.97402	2.24714	0.8941	-1.299	0.441	0.4567	2.4451	0.2728	1.5543	1.5789
	9	1.61236	1.82068	2.03308	2.16374	1.75399	1.93199	2.42525	2.68426	0.2911	-1.7943	-0.2482	-0.2476	1.3379	0.1662	0.7802	0.7807
	10	2.02743	2.17169	2.09869	2.34537	1.63065	1.76489	2.63936	2.88945	-1.4164	0.0987	-0.9871	-0.468	0.2426	1.1037	0.3727	0.6263
	11	2.08315	2.21891	2.03637	2.14839	1.58487	1.85979	2.5021	2.60163	-1.8952	-2.5631	0.8221	-4.2565	0.1503	0.0771	2.2753	0.0142
	12	2.05352	2.45415	1.80479	2.0579	1.73493	1.97642	2.01128	2.30698	0.958	0.4862	0.487	0.5447	2.6065	1.6261	1.6274	1.7241
	13	2.27328	2.59849	1.69864	1.80141	1.55156	1.80746	1.80586	2.07378	0.4978	-2.1576	0.7385	0.4761	1.6451	0.1156	2.0928	1.6098
	14	2.15441	2.47118	1.66739	1.81477	1.46901	1.80759	1.62498	1.87669	0.5398	-0.827	1.1682	0.6679	1.7157	0.4374	3.2162	1.9501
	15	1.91915	2.25361	1.72502	1.88439	1.56847	1.89724	1.56688	1.78306	0.7761	-0.7233	1.0544	0.3411	2.173	0.4851	2.8703	1.4065
	16	1.42299	1.77266	1.30735	1.59865	1.32641	1.47877	1.45809	1.66212	1.2381	1.1174	-0.0237	0.3873	3.4491	3.0569	0.9766	1.473
	17	1.16136	1.51063	1.1841	1.50751	1.03744	1.31786	1.1661	1.54119	1.433	1.3644	1.3281	1.4729	4.1913	3.9134	3.7742	4.3619
	18	0.560542	0.866418	0.816075	0.997136	0.880132	1.1874	1.12849	1.4692	1.8286	1.1074	1.5578	1.4306	6.2252	3.0265	4.7484	4.1812
	19	0.430866	0.680844	0.804444	1.02127	0.46684	0.734312	1.26147	1.56665	1.8513	1.3485	1.8283	1.2362	6.3681	3.8516	6.2233	3.4425
	20	0.471661	0.833956	0.807916	1.05112	0.590093	0.88761	1.3058	1.66592	1.9601	1.4171	1.7866	1.3479	7.1	4.1251	5.9691	3.8493
	21	0.450482	0.79264	0.619217	0.933947	0.79734	1.09419	1.29622	1.70052	1.9553	1.7779	1.6029	1.4499	7.066	5.9174	4.9674	4.2627
	22	0.417325	0.729798	0.639354	0.887423	0.59263	0.859701	1.36387	1.70064	1.9471	1.6309	1.7293	1.2531	7.0083	5.1085	5.6367	3.5012
	23	0.490235	0.739519	0.523045	0.640396	0.719222	1.01931	1.19781	1.56308	1.7884	1.1657	1.6729	1.428	5.9799	3.2133	5.3276	4.1704
				KISII UNIVERSITY						SHEAR VALUE
		APRL		MAY		JUNE		JULY		APRL	MAY	JUNE	JULY	APL	MAY	JUNE	JULY
		10	13	10	13	10	13	10	13	lnZ	lnZ	lnZ	lnZ	Z	Z	Z	Z
	0	2.35519	2.64418	3.25423	3.65889	3.15618	3.36103	4.39464	4.62011	0.0912	0.2229	-1.8428	-3.1821	1.0955	1.2497	0.1584	0.0415
	1	2.33762	2.67808	3.4865	3.89029	3.15516	3.50419	4.61439	4.78288	0.4969	0.0135	-0.1359	-4.8121	1.6436	1.0136	0.8729	0.0081
	2	2.22775	2.50142	3.52817	3.90713	2.98381	3.2969	4.52494	4.75551	0.1357	-0.1346	-0.1407	-2.6386	1.1453	0.8741	0.8687	0.0715
	3	2.46568	2.7371	3.36707	3.70454	3.09491	3.35265	4.81249	5.04552	-0.097	-0.3767	-0.8155	-2.9556	0.9076	0.6861	0.4424	0.052
	4	2.3509	2.60598	3.54049	3.80662	3.4468	3.68861	4.89847	5.16418	-0.0688	-1.1373	-1.4689	-2.642	0.9335	0.3207	0.2302	0.0712
	5	2.34314	2.70749	3.53806	3.9007	3.48989	3.72047	4.89255	5.09842	0.6433	-0.2773	-1.6785	-3.806	1.9027	0.7578	0.1867	0.0222
	6	2.75344	3.00771	3.97882	4.40726	3.59078	3.84281	5.10842	5.29121	-0.4724	-0.1258	-1.465	-5.5992	0.6235	0.8818	0.2311	0.0037
	7	2.86515	3.19703	4.1361	4.56627	3.74947	4.00905	5.13702	5.29489	0.0208	-0.2234	-1.4815	-6.6878	1.021	0.7998	0.2273	0.0012
	8	2.6311	3.02711	4.10329	4.46698	3.25094	3.48377	4.70813	4.98548	0.5775	-0.6047	-1.4047	-2.1108	1.7816	0.5462	0.2454	0.1211
	9	2.55391	2.83983	3.80818	4.17447	2.0176	2.40563	3.61652	4.00721	-0.0044	-0.4741	0.9437	-0.1327	0.9956	0.6224	2.5695	0.8757
	10	2.31039	2.56051	2.79069	3.07009	1.89301	2.06784	2.79354	3.19853	-0.1217	-0.3117	-0.4522	0.5172	0.8854	0.7322	0.6362	1.6773
	11	2.0569	2.32467	2.07566	2.33971	1.6798	1.78314	2.03932	2.47092	0.2239	0.2037	-2.1051	1.0579	1.2509	1.2259	0.1218	2.8803
	12	1.77893	2.13523	1.89768	2.19097	1.38121	1.66856	1.95014	2.02218	1.0053	0.5836	1.0541	-5.0061	2.7327	1.7925	2.8694	0.0067
	13	1.62491	1.92753	1.65867	1.74455	1.28216	1.58136	1.5542	1.99309	0.9315	-3.1415	1.1832	1.3783	2.5383	0.0432	3.2648	3.9682
	14	1.6655	1.97164	1.40686	1.67511	1.48782	1.75802	1.56134	1.81418	0.8421	0.9325	0.8547	0.6654	2.3212	2.5409	2.3507	1.9453
	15	1.70757	1.95755	1.47995	1.93843	1.13532	1.50291	1.62466	1.91364	0.508	1.4585	1.4718	0.837	1.662	4.2995	4.3571	2.3094
	16	1.29401	1.6463	1.15987	1.53733	1.25901	1.57321	1.64324	2.06784	1.3624	1.5017	1.2362	1.3019	3.9056	4.4893	3.4425	3.6763
	17	1.20762	1.47516	1.27767	1.55156	1.5884	1.80931	1.44105	1.78114	1.1268	1.0588	0.4064	1.1914	3.0858	2.8829	1.5014	3.2917
	18	1.0473	1.32832	1.65225	1.92036	1.17269	1.52565	2.13911	2.23133	1.3187	0.6992	1.4499	-3.9359	3.7386	2.0121	4.2627	0.0195
	19	1.35793	1.6316	1.71038	1.9938	0.905763	1.1684	2.27799	2.67916	0.981	0.7003	1.3843	0.8071	2.6671	2.0144	3.992	2.2414
	20	1.43247	1.74433	1.84725	2.08535	1.49007	1.66101	2.7855	3.15735	1.0923	0.2802	0.003	0.3242	2.9811	1.3234	1.003	1.3829
	21	1.61608	1.90956	1.9123	2.30938	2.25021	2.50244	3.35898	3.71181	0.837	1.0498	-0.0587	-0.2161	2.3094	2.8571	0.943	0.8057
	22	1.6557	1.98083	2.18786	2.51806	2.85862	3.10002	3.74212	4.0017	0.9416	0.5614	-0.8239	-1.4714	2.5641	1.7531	0.4387	0.2296
	23	2.05926	2.33742	3.09202	3.46735	3.03732	3.34571	4.37442	4.50925	0.3723	0.1691	-0.2703	-5.8869	1.4511	1.1842	0.7632	0.0028
				FEB AND MARCH roughness
				NYAMS	KSU	IKOBE	NYAMS	KSU	IKOBE
			0	5.62	0.3	1.87	6.31	0.21	2.29
			1	6.16	0.42	2.07	7.05	1.11	1.59
			2	6.95	0.7	2.96	6.47	0.88	4.21
			3	6.63	0.23	1.98	7.24	0.28	3.41
			4	6.63	0.32	1.73	6.46	0.28	4.01
			5	6.24	0.33	2.69	7.53	0.46	1.97
			6	6.28	0.43	2.81	7.88	0.35	3.46
			7	6.19	0.35	2.67	6.72	0.71	2.69
			8	2.79	0.23	0.85	4.06	0.69	0.00023
			9	0.31	0.58	1.72	2.69	1.38	0.00042
			10	1.14	0.75	1.12	2.01	0.13	0.12
			11	1.16	0.38	0.016	1.06	0.31	0.38
			12	0.97	0.48	0.033	1.2	1.21	0.77
			13	2.15	0.79	0.0048	1.04	0.83	0.78
			14	0.88	0.89	0.67	1.72	0.97	0.51
			15	2.04	0.83	0.66	3.04	1.62	0.88
			16	2.18	0.56	1.07	3.22	2.26	2.9
			17	2.23	1.89	1.1	3.03	3.21	3.44
			18	2.52	2.42	2.76	5.85	1.95	3.46
			19	3.58	2.09	3.46	5.51	0.89	3.21
			20	4.04	1.42	3.36	6.41	2.8	2.12
			21	4.46	0.68	4.25	6.08	1.62	2.31
			22	4.75	0.51	3.53	6.02	2.02	1.9
			23	2.85	0.95	2.97	8.06	1.34	1.39
