# Supplementary material for: Determination of the Surface Roughness Parameter and Wind Shear Exponent of Kisii Region from the On-Site Measurement of Wind Profiles
Source: Hindawi journal article supplement (doi:10.1155/2019/8264061), 2019-07-01
Supplement: f1 [file 8264061.f1.zip › 8264061.f1/8264061_SupplDesc.docx]

Table 1 in the supplementary data document represents organized data from the raw data obtained from the experiments set at the mentioned sites for the month of February. It is the data that was used to plot graphs that shows how roughness parameter (Zo) varies at the site and later in concluding the findings. Table 2 shows data that was used to draw conclusion on the variation of roughness parameter for the month of March at the site. Table 3 on the supplementary data shows the calculated power based on the theoretical wind shear exponent of 1/7th and the on-site calculated value. In the table 3, the first and second row corresponds to wind power calculated from the 1/7th theoretical value and on site calculated value for the month of February respectively while rows 3 and 4 of the table represents wind power calculated from the 1/7th theoretical value and on site calculated value for the month of march respectively.

Raw data has not been included in the supplementary data but can be obtained from authors upon request
