# Supplementary material for: Determination of the Surface Roughness Parameter and Wind Shear Exponent of Kisii Region from the On-Site Measurement of Wind Profiles
Source: Hindawi journal article supplement (doi:10.1155/2019/8264061), 2019-07-01
Supplement: f1 [file 8264061.f1.zip › 8264061.f1/Kisii analys B 10M .xlsx]

## Sheet: Sheet1
		Kisii B
			April
	#NAME?	1	2	3	4	5	6	7	8	9	10	11	12	13	14	15	16	17	18	19	20	21	22	23	24	25	26	27	28	29	30	AV		M/S
	0	4.11042	8.96328	8.84854														3.93494	5.28483	4.45464	4.44789	3.36798	0.938175	1.03267	6.28375	7.62014	3.32748	0	0.317225	6.91145	7.99136	4.57852	0.5144	2.35519
	1	7.10718	10.0432	6.8777														3.22624	5.17009	3.7122	7.28267	2.65254	0.688445	0	5.6493	10.1242	4.22516	0.229482	0.202484	4.20491	5.85853	4.54437		2.33762
	2	4.3399	9.24676	6.59422														3.1655	4.21841	2.28132	6.304	4.71112	0.0269978	0.398218	6.07451	9.59098	5.54131	1.53888	0.229482	5.08234	4.27916	4.33077		2.22775
	3	8.30184	9.30076	6.59422														4.96085	4.87311	3.30049	5.50756	4.61663	2.11933	0	5.33207	10.1309	5.85853	0.168737	0	8.39633	2.02484	4.79331		2.46568
	4	7.39066	9.72597	5.22408														3.1655	3.52997	6.223	6.76296	2.5378	1.73461	3.25324	6.62122	8.82154	1.2824	2.80103	0	7.73488	0.884179	4.57018		2.3509
	5	8.76755	10.6506	5.58855														4.45464	4.30616	6.59422	6.8777	0.398218	1.70761	3.87419	4.16442	5.82478	0	1.84935	3.70545	8.67306	0	4.55509		2.34314
	6	9.50324	10.7114	7.73488														3.90119	4.93386	6.45923	8.44357	0	4.21841	4.16442	6.76296	7.05319	1.68062	4.73812	1.56587	8.21409	0.911177	5.35272		2.75344
	7	9.59098	10.9341	4.51539														1.14066	3.50297	7.04644	8.16685	2.47705	1.59287	4.65038	8.32883	7.70113	0	5.28483	5.39957	10.4212	3.93494	5.56989		2.86515
	8	6.04752	10.5359	5.30508														0.512959	3.79995	7.37041	7.02619	4.4209	0	5.52106	6.96544	7.81588	0.654698	3.88094	6.91145	6.36474	3.82019	5.1149		2.6311
	9	5.90578	11.4133	5.36582														1.2824	2.76728	5.45356	4.07667	2.42306	2.30832	4.07667	6.13526	7.35691	2.25432	4.47489	7.41766	6.62797	5.0621	4.96482		2.55391
	10	3.96193	8.04536	7.23317														1.2824	5.10934	2.11933	3.09125	3.59071	2.73353	2.31506	6.14201	3.91469	2.36231	4.24541	7.33666	5.96652	6.9047	4.49143		2.31039
	11	4.47489	5.22408															2.63229	4.50864	2.56479	2.51755	4.13742	1.32964	3.0845	2.79428	4.19816	4.3399	5.05535	4.61663	4.73812	7.76188	3.99863		2.0569
	12	2.88202	4.82586															2.23407	3.65146	2.71328	2.73353	3.7932	3.07775	2.61879	2.06533	5.0486	2.54455	1.59287	4.27241	3.34098	7.93736	3.45825		1.77893
	13	2.34881	2.70653														2.70822	1.94384	3.82694	3.25324	3.1655	3.28024	2.5108	3.30724	2.00459	1.57937	4.59638	1.79536	3.7392	3.39498	7.53915	3.15885		1.62491
	14	3.05751	2.36231														5.73704	2.03159	2.56479	3.57046	5.42657	3.56371	1.90335	1.82235	1.2284	1.39714	5.12959	2.59854	2.28807	3.1115	7.24892	3.23776		1.6655
	15	3.1115	4.73812														2.82127	1.87635	1.51188	3.6987	5.6763	2.33531	3.63121	2.63229	3.1115	2.24757	3.13175	4.76512	3.40173	0.526458	7.21517	3.31954		1.70757
	16	2.5108	4.10367														1.76836	0.553456	1.9101	2.99001	2.96301	2.84827	3.34098	1.97084	1.48488	2.36906	3.48272	3.50972	1.99109	0.141739	4.82586	2.51556		1.29401
	17	5.50756	4.11042														1.11366	0	0.823434	2.36906	4.36015	2.59854	2.91577	3.85394	1.16091	1.08666	1.07991	2.01809	1.48488	0	5.42657	2.34762		1.20762
	18	2.5378	4.15767														2.79428	0	0.202484	1.47813	2.34206	3.10475	1.76836	4.81911	3.05076	0.654698	2.25432	0.600702	2.99676	0	1.84935	2.03595		1.0473
	19	7.78888	5.53456														0.290227	1.56587	0	2.05184	2.90227	0.830184	0.485961	2.70653	6.56722	2.96301	0.485961	3.14525	6.10151	0.317225	1.14066	2.63983		1.35793
	20	7.99136	8.01836														0.310475	2.38931	0.654698	4.30616	2.47705	0.600702	0	4.04293	6.9047	3.55697	0.317225	0	5.77079	0	0	2.78475		1.43247
	21	1.2824	9.25351														0	4.45464	2.28132	4.85286	5.82478	2.22732	0	6.62122	9.19277	1.2014	1.39714	0	2.11258	0.6277	2.07883	3.14168		1.61608
	22	3.44897	7.76188														2.65254	6.10151	1.71436	0.884179	5.39957	3.28024	0	5.90578	9.10502	0.681696	0.715443	0.398218	2.5648	1.45113	2.65254	3.2187		1.6557
	23	8.53807	8.67981														2.90902	6.78996	2.56479	3.44897	5.30508	0.425216	0	4.67738	9.75297	1.76161	1.70761	0	2.22732	5.38607	3.88094	4.00322		2.05926
		May
	#NAME?	1	2	3	4	5	6	7	8	9	10	11	12	13	14	15	16	17	18	19	20	21	22	23	24	25	26	27	28	29	30	AV
	0	5.6493	8.1061	8.70006					7.13418	10.9544	7.5324	7.71463	7.59314	5.76404	2.79428	7.18817	3.10475	4.38715	8.04536	0	5.65605	3.57046	4.62338	9.67198	8.33558							6.32627	0.5144	3.25423
	1	7.75513	4.18467	9.90146					7.18817	10.6169	9.02403	9.07127	8.1331	1.9371	4.13742	7.97111	3.1115	6.56722	7.96436	1.99784	7.5594	4.98785	3.92819	10.6169	8.90254							6.77781		3.4865
	2	7.64039	2.88202	10.2727					5.89903	10.5967	9.01728	8.98353	8.24109	2.30832	7.52565	6.18925	2.88877	7.4514	8.78105	1.2824	5.5683	7.76188	5.13634	9.58423	9.16577							6.8588		3.52817
	3	7.30967	2.59854	10.6439					1.34314	10.3334	8.55832	10.1309	7.80913	3.05751	8.04536	1.10691	2.59854	7.92387	8.1601	1.17441	7.44465	6.196	6.304	10.4144	9.75972							6.54563		3.36707
	4	8.36258	4.04968	9.55724					1.51863	9.82046	9.11177	9.67198	10.2727	3.36798	6.75621	0.971922	2.88877	7.68089	9.67873	3.1385	8.30859	5.6223	7.44465	9.90146	9.53024							6.88276		3.54049
	5	6.87095	4.3399	8.81479					0.688445	10.5899	8.72705	9.53024	9.67198	3.30724	7.51215	2.76728	1.59962	7.70113	10.1849	1.47813	8.15335	6.73596	9.9622	9.30751	9.61798							6.87804		3.53806
	6	9.18601	2.28807	8.84854					2.88202	10.2187	7.84962	8.92953	10.5764	8.22084	7.5324	5.33882	1.9371	8.41658	10.5359	4.02268	8.7338	8.1601	11.0759	9.72597	10.2187							7.73488		3.97882
	7	11.2379	0.99892	8.7608					7.84962	10.8464	10.3402	9.86771	9.15902	8.7068	9.59098	6.8777	0.539957	9.67873	10.5359	0	8.67981	8.78105	9.49649	9.55724	9.30751							8.04063		4.1361
	8	9.52349	2.65929	9.67198					7.4514	10.7586	10.9004	9.95545	11.2649	7.64714	8.48407	7.93736	0.539957	9.53699	9.50324	0.114741	6.8507	8.44357	8.39633	9.56398	10.3334							7.97685		4.10329
	9	4.76512	3.1385	8.35583					7.10718	9.65173	11.7846	9.30076	10.6102	6.65497	9.15902	6.59422	3.7122	8.01161	8.35583	0.769438	8.36258	9.24676	5.36582	9.61798	7.49865							7.40315		3.80818
	10	5.79104	2.90902						5.96652	7.39066	6.96544	8.1601	7.04644	4.27916	4.27916	6.76296	0.863931	5.33882	5.50081	1.48488	7.15443	7.16793	2.13958	10.0432	3.83369							5.42515		2.79069
	11	2.96301	4.76512						4.19141	3.95518	4.44789	4.3669	4.42765	3.19924	3.45572	2.13283	4.42765	3.33423	3.34098	2.90902	5.44681	6.91145	1.91685	8.61231	1.86285							4.03511		2.07566
	12	3.48272	4.92711						1.96409	3.57046	3.75945	4.91361	3.1385	2.5378	2.91577	3.43548	4.48164	3.30724	2.23407	4.9406	3.25324	5.50756	3.88094	5.58855	2.25432							3.68911		1.89768
	13	1.51863	3.68521						5.10934	4.70437	2.73353	4.50189	2.45005	3.03051	1.2284	3.1385	2.47705	2.30832	1.48488	4.11042	2.64579	5.05535	3.47597	5.07559	2.53105							3.22447		1.65867
	14	1.2554	6.70896						2.22732	4.76512	2.10583	2.88877	0.485961	0.938175	2.85502	3.13175	3.14525	0.890929	1.77511	4.07667	4.50189	2.60529	1.16766	3.55697	2.88202							2.73495		1.40686
	15	1.39714	0.715443						3.54347	3.68521	6.43224	2.24082	2.71328	5.87878	2.05859	3.7662	2.96301	1.99784	0.398218	4.42765	4.79212	0.114741	3.05751	2.93602	1.54563							2.87705		1.47995
	16	1.00567	1.02592						1.71436	1.62662	0.796436	2.93602	6.78996	3.82694	0.769438	2.62554	1.72111	5.43332	2.24757	2.20032	3.19924	0.6277	1.51863	2.24757	0.528708							2.25479		1.15987
	17	1.68062	1.14066						2.22732	5.21733	1.03267	4.76512	3.59071	2.53105	4.64363	4.11042	0.681695	5.24433	1.74136	0.148488	1.76836	0.141739	4.04293	0								2.4838		1.27767
	18	3.07775	1.56587						1.74136	6.62122	0.0607451	6.9317	5.33207	6.196	4.04968	2.65254	0.539957	7.56614	0.256479	0.654698	4.15767	0	4.36015	2.05184								3.21199		1.65225
	19	1.56587	4.21166					0.573704	6.02727	3.28024	3.05751	7.36366	5.62905	6.31075	1.2824	1.11366	0.141739	8.0926	0.458963	1.42414	2.10583	5.31182	4.73812	0.485961								3.325		1.71038
	20	1.10691	5.76404					1.56587	6.10151	1.19465	3.21949	4.67738	6.53348	5.91253	1.64687	2.59854	2.53105	6.13526	1.31614	0.229482	2.56479	5.14309	7.93737	2.05184								3.59107		1.84725
	21	1.77511	10.6506					1.94384	6.56723	0.283477	5.24433	2.17333	5.94627	3.54347	0.715443	1.08666	2.90902	6.62122	1.82235	3.63121	0.573704	4.08342	6.70221	4.36015								3.71753		1.9123
	22	4.00243	10.7586					0	9.84746	0.344222	4.42765	5.73029	4.58963	3.1385	1.31614	1.76836	4.04968	6.68197	2.59854	5.22408	0.850432	2.77403	6.54023	6.16901								4.25323		2.18786
	23	4.50864	9.52349					3.57046	10.4414	5.34557	8.58531	7.82262	5.76404	4.50864	3.05076	3.62446	4.93386	7.11393	3.82019	5.77079	3.53672	7.22867	6.75621	8.30184								6.01093		3.09202
		June
	#NAME?	1	2	3	4	5	6	7	8	9	10	11	12	13	14	15	16	17	18	19	20	21	22	23	24	25	26	27	28	29	30	AV
	0				4.9946	0.0269978	0.229482	5.87878	7.36366	8.7608	5.94627	9.12527	10.2524	8.84179	1.26215	7.53915	3.39498	4.02943	9.73947	9.73947	8.32883											6.20315	0.5144	3.1909
	1				4.58963	1.42414	1.54563	3.70545	3.46247	7.99136	3.62446	10.5562	10.7924	9.84071	3.40173	5.89903	4.79887	6.65497	9.53024	9.53024	9.04428											6.25834		3.21929
	2				5.28483	3.1655	2.4568	4.44789	0.681695	7.5054	3.7122	9.78672	10.4752	10.5629	1.16766	6.16901	5.88553	8.04536	9.73947	9.73947	2.79428											5.97764		3.0749
	3				5.82478	1.11366	3.05076	7.41766	1.71436	7.33666	5.70329	9.75972	10.7519	11.3593	2.71328	1.34314	5.74379	7.79563	9.18602	9.18602	5.98677											6.23452		3.20704
	4				4.13742	0.573704	4.11042	7.66739	7.32991	6.8777	8.42333	10.0769	11.5551	10.8194	1.14066	2.74028	7.16793	7.93062	8.96328	8.96328	8.49757											6.88088		3.53952
	5				4.00243	1.11366	5.13634	7.58639	8.04536	7.14093	8.09935	9.79347	10.7384	10.4752	1.2824	4.13742	6.78996	7.98461	10.3604	10.3604	7.64714											7.09964		3.65205
	6				2.32856	0	2.05184	7.93062	7.39066	5.99352	7.02619	9.21976	11.7846	11.2716	5.65605	6.13526	7.84287	8.28159	9.84071	9.84071	8.6933											7.13458		3.67003
	7				4.42765	2.36906	0.485961	8.1871	7.72813	6.59422	6.28375	8.49757	12.986	11.3526	9.04427	6.51323	6.10151	7.48515	10.1917	10.1917	8.35583											7.45855		3.83668
	8				4.04968	3.93494	0.256479	7.13418	6.74271	4.9406	4.4209	7.5594	12.5337	10.2457	8.30184	4.06317	4.70437	5.65605	8.98353	8.98353	8.24109											6.51482		3.35122
	9				1.72111	2.88202	0.857181	7.41091	4.21841	1.51863	1.68062	3.61771	11.0759	8.94978	3.44897	1.91685	2.40281	3.75945	5.16334	5.16334	3.91469											4.1001		2.10909
	10				3.03051	2.71328	2.80103	4.81911	3.38823	1.51188	2.22732	2.23407	8.75405	7.82262	3.44897	2.73353	2.76728	3.6852	2.65254	2.65254	2.94276											3.54029		1.82113
	11				3.88769	1.96409	2.94276	2.59179	2.39606	1.99784	2.88202	2.13958	8.09935	7.32316	2.40281	1.14066	4.02268	2.74028	2.80103	2.80103	1.99109											3.18376		1.63773
	12				2.67954	1.96409	2.85502	2.61879	2.03159	2.02484	2.20032	1.88985	4.85286	4.62338	3.02376	1.59962	2.65929	3.05076	2.08558	2.08558	0.769438											2.53025		1.30156
	13				2.13958	1.46463	1.94384	2.45005	0.573704	1.77511	1.77511	2.38931	3.69195	4.76512	2.79428	0.688445	2.65254	1.11366	3.73245	3.73245	2.82127											2.38256		1.22559
	14				5.31183	2.16658	1.54563	3.7662	1.9371	3.05751	1.72111	2.39606	3.94168	3.90794	2.24757	1.9101	2.57829	3.10475	2.65254	2.65254	1.69411											2.74068		1.4098
	15				0.114741	2.30832	2.5378	1.96409	0.971922	2.14633	0.546706	1.54563	2.82802	3.64471	2.01809	2.02484	2.26107	1.72111	2.22732	2.22732												1.943		0.99948
	16				0.836933	3.17225	3.73245	0.938175	1.8831	0.654698	2.4568	1.97084	3.82019	3.90794	2.31506	1.62662	1.97759	2.99676	0.715443	0.715443												2.10752		1.08411
	17			0	2.14483	0.569954	3.0935	0.142489	6.292	2.60229	3.89594	1.53363	2.80103	0.348722	0.892429	1.1999	0.821184	7.84437	7.02694	7.02694												2.83742		1.45957
	18			0	2.4838	0.283477	1.9101	0.256479	4.27916	4.02268	3.25324	1.19465	0.850432	1.2554	0.600702	1.43763	0.485961	8.95653	3.82694	3.82694												2.28966		1.1778
	19			0.580454	0	0.202484	2.85502	5.76404	2.05184	1.71436	6.56048	1.19465	2.67954	0.654698	2.13958	0.573704	0	5.87203	6.07451	6.07451												2.64658		1.3614
	20			0.0607451	0	0.796436	2.67954	7.28267	7.48515	1.9101	9.07802	4.17117	6.70221	0.458963	5.34557	2.4568	1.31614	9.50324	6.81695	6.81695												4.2871		2.20528
	21			1.2824	0	2.02484	0.971922	7.4514	8.99028	2.11258	9.13202	7.42441	7.28267	2.65254	6.71571	5.39282	5.27808	9.01728	8.72705	8.72705												5.48136		2.81961
	22			1.57262	0	2.14633	3.28024	7.67414	7.51215	4.9406	7.39066	8.84854	6.85745	3.36798	8.87554	6.25675	5.45356	9.3615	8.84854	8.84854												5.95501		3.06326
	23			2.38762	0	1.18116	4.27747	8.76586	7.99811	5.24771	7.98967	8.92616	7.03631	2.1767	9.0949	5.99858	4.88492	9.88796	9.38175	9.38175												6.15392		3.16558
		July
	#NAME?	1	2	3	4	5	6	7	8	9	10	11	12	13	14	15	16	17	18	19	20	21	22	23	24	25	26	27	28	29	30	31	AV
	0															9.45599	11.2513	10.0094	2.39606	6.8237	8.67306	9.4425	12.2705	12.1558	10.4752	9.40875	10.0432	8.1871	7.5594	2.94276	7.93062	6.2095	8.54323	0.5144	4.39464
	1															10.0499	9.75972	10.2727	3.0845	7.24892	8.40308	10.4414	12.446	11.7306	10.7046	8.90929	10.4212	9.69222	10.3537	3.28699	7.47165	8.22084	8.97043		4.61439
	2															9.61798	9.87446	9.38175	4.10367	7.5324	9.13877	10.4819	11.987	11.6496	11.3593	7.08018	11.7306	9.27376	9.38175	2.56479	6.76296	7.62014	8.79653		4.52494
	3															9.3885	10.5224	10.0702	3.81345	7.76863	10.8126	9.75972	11.1906	13.6407	10.5292	7.64714	9.79347	10.9814	8.90254	6.31074	7.76188	10.1512	9.35555		4.81249
	4															9.18602	10.9206	10.0499	3.36798	9.21301	9.84071	10.0162	11.2446	12.7565	11.0219	8.53132	10.1579	10.9341	9.64498	7.90362	8.32883	8.76755	9.52269		4.89847
	5															10.5832	11.6698	10.0229	3.88094	7.68089	9.55723	9.58423	13.3099	12.5877	10.5359	10.5022	10.6506	9.3345	9.81372	6.53348	6.94519	8.49757	9.51118		4.89255
	6															11.8183	12.446	10.5629	3.96868	9.72597	11.0421	10.6371	13.2964	13.7014	10.6102	10.1917	9.78672	9.90146	9.52349	7.10043	6.88445	7.62689	9.93084		5.10842
	7															11.2176	11.5551	10.0229	3.98218	10.2727	10.4482	10.2457	13.8094	12.419	11.8656	10.4482	8.86879	11.4201	10.4954	8.24109	7.4514	7.00594	9.98642		5.13702
	8															7.85637	9.38175	7.16118	2.24757	9.85421	10.5899	10.7249	12.581	12.0613	11.7643	9.81371	9.22651	11.0219	11.2244	6.93844	6.73596	6.41199	9.15266		4.70813
	9															6.65497	9.71248	4.67738	3.07775	6.68871	7.30292	7.64714	10.3132	8.42333	10.8126	7.4784	6.62122	9.04428	8.33558	3.93494	4.56938	4.22516	7.03056		3.61652
	10															5.36582	9.10502	2.13958	2.96976	6.304	3.85394	5.71679	8.11285	7.93736	9.47624	6.10826	4.82586	5.13634	4.25216	2.19357	6.50648	2.31731	5.43067		2.79354
	11															3.68521	6.98569	2.51755	1.80211	5.39282	1.56587	3.7662	3.90794	4.90686	7.20167	3.6852	4.11042	4.17117	3.02376	3.60421	3.10475		3.96446		2.03932
	12															3.24649	4.01593	3.73245	0.458963	4.76512	1.8561	1.9371	3.88769	5.56156	2.84827	4.93386	2.84827	6.304	3.7932	3.19249	7.27592		3.79109		1.95014
	13														5.81803	1.99784	2.5648	4.08342	2.31506	2.65254	1.56587	0.742441	1.57262	3.50972	1.8291	3.19924	2.96301	2.5378	5.6223	3.14525	5.24433		3.02138		1.5542
	14														7.61339	3.22624	3.73245	2.70653	2.84827	2.5108	1.62662	2.30832	1.45113	1.48488	1.71436	1.13391	2.62554	3.07775	6.277	3.98893	3.27349		3.03527		1.56134
	15														7.04644	1.99784	2.07883	3.34098	0.742441	1.94384	2.54455	2.24757	2.09233	3.28699	0.803186	3.05076	6.67522	2.76728	7.44465	3.1385	2.49055		3.15835		1.62466
	16														4.9676	3.02376	3.33423	7.24892	1.34314	1.2824	2.16658	0.573704	1.31614	2.4568	0.0539957	4.3939	9.18602	4.16442	3.85394	2.14633	2.79428		3.19448		1.64324
	17														5.57505	2.16658	3.1385	4.00243	0.344222	1.74811	0.0809935	4.11042	2.59179	4.48164	1.79536	1.11366	6.223	1.74136	4.67738	2.08558	1.74811		2.80142		1.44105
	18														6.99919	4.13067	5.01485	0.512959	0	1.46463	0.539957	10.2997	5.6223	5.85178	3.1385	3.7392	3.30724	5.65605	8.42333	1.34314	4.65038		4.15846		2.13911
	19														8.7608	4.77187	2.99676	1.76836	0	2.14633	4.11042	10.7249	7.64714	7.18817	4.58288	2.77403	1.51188	1.9101	9.79347	0.6277	3.96868		4.42844		2.27799
	20														9.64498	7.65389	2.84827	2.13958	1.2014	3.27349	6.79671	9.69897	9.21976	10.3334	8.49757	2.57154	2.82802	3.1655	8.01836	2.25432	1.9101		5.41505		2.7855
	21														10.0769	7.16793	6.38499	2.4838	5.0486	4.9946	8.7068	10.7586	9.4155	8.96328	5.79104	2.10583	3.00351	4.56938	8.89579	6.02052	6.62122		6.5299		3.35898
	22														10.3334	8.62581	8.36258	3.96868	4.65038	8.16685	8.67306	10.9274	12.014	9.61123	3.19249	6.56723	4.21841	2.30832	8.24784	7.4379	6.36474		7.27473		3.74212
	23														10.2592	10.4212	9.43575	4.71112	7.16118	9.22651	9.44924	12.7227	12.3515	11.1906	7.64039	10.1782	6.81695	3.42198	4.64363	8.56506	6.37149		8.50392		4.37442
