# Supplementary material for: Determination of the Surface Roughness Parameter and Wind Shear Exponent of Kisii Region from the On-Site Measurement of Wind Profiles
Source: Hindawi journal article supplement (doi:10.1155/2019/8264061), 2019-07-01
Supplement: f1 [file 8264061.f1.zip › 8264061.f1/Kisii analysis A 13M.xlsx]

## Sheet: Sheet1
		April
	#NAME?	1	2	3	4	5	6	7	8	9	10	11	12	13	14	15	16	17	18	19	20	21	22	23	24	25	26	27	28	29	30	AV
	0	4.45464	9.61123	10.1512														4.25216	5.65605	4.56938	4.71112	3.7932	2.08558	1.48488	6.2905	8.42333	3.61771	0.0269978	1.42414	8.36258	8.47057	5.14031		0.5144	2.64418
	1	7.24892	10.5292	7.30292														3.67846	5.54131	4.48164	7.08018	3.82019	0.539957	1.16766	6.46598	11.3863	4.58963	1.51863	0.37122	5.22408	7.5594	5.20622			2.67808
	2	5.14309	10.0432	7.68089														3.36798	4.58963	2.64579	6.31075	5.21733	1.71436	0	6.39174	10.3874	5.6493	1.97084	0.398218	5.85178	5.30508	4.86279			2.50142
	3	8.09935	9.3885	7.11393														5.17009	4.65038	4.23191	6.304	4.79212	3.54347	0	5.79779	10.5899	5.87878	2.38931	0.6277	9.07802	2.80103	5.32096			2.7371
	4	7.93737	10.8126	5.91253														3.42198	3.50972	6.47273	7.16793	2.99676	2.65929	3.50972	6.56048	8.99028	1.8831	3.73245	0.398218	8.44357	1.71436	5.06607			2.60598
	5	8.64606	10.6102	6.33774														5.0486	4.65038	7.18817	7.71463	1.11366	3.25999	4.15767	4.85286	7.62689	0.0269978	2.25432	4.59638	10.0229	1.37014	5.26339			2.70749
	6	9.73272	11.3256	8.39633														4.10367	5.25783	7.30967	8.96328	0.863931	4.59638	4.19816	7.04644	7.70113	1.82235	5.19708	1.70761	9.12527	2.05184	5.84702			3.00771
	7	10.3334	11.5821	4.79887														1.18116	3.24649	7.65389	8.82154	2.65254	3.7662	5.0216	8.99028	9.09827	0.600702	5.39957	6.277	11.4741	4.75837	6.21506			3.19703
	8	7.84962	12.041	6.51323														0.803186	3.7932	8.01836	7.05319	4.47489	2.54455	5.5953	7.32991	8.93629	1.11366	3.88094	7.19492	8.79455	4.10367	5.88474			3.02711
	9	6.13526	11.9533	5.5953														1.74136	3.90794	6.41874	4.54239	3.00351	3.15875	4.3399	6.41199	8.01161	2.71328	4.67738	8.0791	6.9317	6.22975	5.52066			2.83983
	10	5.68305	9.85421	7.04194														2.13958	5.07559	2.91577	3.64471	2.96301	2.93601	2.4838	6.16901	4.76512	3.25324	4.65038	8.1331	5.44006	7.47165	4.97766			2.56051
	11	4.90011	5.73704															3.22624	4.76512	3.02376	3.36123	4.02268	1.91685	3.36123	3.32748	5.11609	4.70437	5.98677	4.52889	5.99352	8.33558	4.51919			2.32467
	12	3.48272	5.30508															2.99676	3.67846	3.19249	3.19924	4.31965	3.88769	3.73245	2.93602	6.11501	2.82127	2.4568	4.68413	4.36015	9.24676	4.15092			2.13523
	13	3.8067	3.64471														2.82127	2.42306	4.53564	3.96868	3.56371	4.20491	2.39606	3.70545	2.31506	2.05184	5.57505	2.34206	3.65146	4.33315	8.36258	3.74714			1.92753
	14	3.24649	3.05751														5.30508	2.62554	3.59746	3.42198	5.97327	4.4209	2.71328	2.99001	1.8831	1.8291	5.66955	3.40173	3.24649	4.53564	7.24217	3.8329			1.97164
	15	3.87419	4.68413														3.19924	2.26107	2.65254	3.7932	5.79779	3.27349	3.59746	2.85502	3.34098	3.22624	4.04968	5.61555	3.99568	0.99892	7.4784	3.8055			1.95755
	16	3.22624	4.61663														2.34206	0.978672	3.13175	3.28024	3.54347	3.7122	3.59071	2.19357	2.50405	3.42198	4.00243	4.27916	1.9101	1.2284	6.44573	3.20044			1.6463
	17	5.98677	4.3939														1.53888	0.803186	1.43089	2.93602	4.27241	3.03051	3.6987	3.7662	2.02484	1.37014	1.93709	3.1115	2.28807	0.485961	5.6763	2.86773			1.47516
	18	2.99001	4.25216														3.34098	0.573704	0.74919	1.69411	3.1655	3.50972	1.96409	5.05535	3.90119	1.74811	3.14525	1.07991	3.67846	0.566955	2.4838	2.58226			1.32832
	19	7.32991	6.277														0.546706	2.70653	0.290227	2.79428	3.19249	1.86285	0.971922	3.27349	7.24892	3.87419	1.39714	3.27349	6.54023	0.458963	1.8831	3.17185			1.6316
	20	9.15227	8.7608														1.10691	2.74028	0.863931	4.9676	3.36123	1.2284	0	4.33315	7.73488	3.98893	1.23515	1.2959	5.73704	0.283477	0.857181	3.39101			1.74433
	21	2.41631	10.4819														1.31614	4.56264	2.79428	5.27808	6.14201	2.4838	0	7.05319	10.5899	1.91685	2.05859	0.317225	2.92252	0.485961	2.28807	3.7122			1.90956
	22	3.67846	9.07802														2.74028	6.28375	2.22732	2.37581	6.10826	3.30724	0	6.223	9.81372	1.96409	1.76836	1.2014	2.67954	2.5378	3.47597	3.85077			1.98083
	23	9.06452	9.07127														3.56371	7.36366	2.76728	3.65821	6.02052	1.45788	1.42414	5.28483	10.9544	2.59179	2.13283	0.0809935	2.42981	5.27808	4.10367	4.54397			2.33742
		May
	#NAME?	1	2	3	4	5	6	7	8	9	10	11	12	13	14	15	16	17	18	19	20	21	22	23	24	25	26	27	28	29	30	31	AV
	0	5.90578	8.96328	9.55724					7.62014	11.3053	8.51107	9.24676	8.63256	6.68197	3.82019	8.1331	3.56371	5.14309	8.8148	1.77511	6.02052	4.30616	4.9946	10.6439	8.61906								7.11292	0.5144	3.65889
	1	8.87554	4.4209	10.6709					7.61339	11.1906	10.1849	9.84746	8.44357	2.74703	4.79887	9.10502	4.02268	7.22192	9.01728	3.00351	7.88337	5.6763	4.4209	11.7306	10.3807								7.56277		3.89029
	2	9.30751	4.21841	11.5213					6.45248	11.0421	9.90821	10.0634	8.51107	3.1385	8.27484	6.58747	3.1655	7.4514	9.53699	2.05859	6.54023	8.07235	5.45356	10.2727	10.3334								7.5955		3.90713
	3	7.36366	3.28024	11.4201					1.80211	10.6776	9.87446	11.0759	8.75405	3.50972	8.38958	1.74136	3.22624	8.49757	9.24676	1.59962	8.0791	7.16118	6.29725	11.5618	10.4752								7.20167		3.70454
	4	8.7608	4.52889	10.3604					0.803186	11.1839	9.87446	10.4144	10.5899	3.7122	7.73488	1.94384	3.19924	8.22084	10.4414	3.70545	8.70005	5.99352	7.56614	10.3604	9.90821								7.40011		3.80662
	5	7.04644	5.41307	9.82047					1.68737	11.1029	9.65173	9.64498	11.2446	3.82019	8.1061	3.34098	2.22732	8.55831	11.2783	1.65362	8.67306	7.06668	10.5292	9.80697	10.9881								7.58302		3.9007
	6	9.69898	3.05751	9.87446					4.54239	10.5629	8.7608	9.92845	11.4741	9.01728	8.53132	5.98677	2.59179	9.24676	11.0151	4.75837	9.27376	8.58531	11.7643	11.2041	11.4808								8.56776		4.40726
	7	11.6428	2.05859	9.44924					8.87554	11.4606	11.4268	11.4066	10.2389	9.44249	10.0162	7.70788	1.8831	10.7114	11.6698	0.0269978	9.08477	9.85421	10.1309	10.3267	10.1242								8.87689		4.56627
	8	10.8396	3.7122	9.82046					8.1601	10.9004	11.8116	10.9274	12.581	8.03861	8.96328	8.24784	1.80211	9.93521	10.5562	0.0269978	7.36366	9.42225	9.50999	10.6709	10.3874								8.68386		4.46698
	9	5.82478	3.90119	9.48299					7.76188	10.8531	12.527	9.95545	10.8194	6.84395	9.15902	7.62014	4.02268	8.98353	8.7878	1.31614	9.4155	10.2254	6.10826	10.2727	8.42333								8.11521		4.17447
	10	6.53348	3.56371						6.53348	8.1331	7.39066	7.76188	8.06561	4.62338	4.70437	7.30292	1.80211	6.74271	5.71004	2.05859	7.4514	8.12635	2.03159	10.3807	4.48164								5.9683		3.07009
	11	3.13175	5.14309						3.99568	3.44897	4.71112	5.17684	4.75837	2.99676	3.82694	3.61771	5.41982	3.56371	4.13742	3.28699	6.14201	8.15335	2.66604	9.44924	2.79428								4.54843		2.33971
	12	3.18575	5.19708						3.14525	4.48839	3.64471	5.68305	3.6987	3.098	3.42198	3.53672	5.14309	3.96193	2.74028	6.42549	3.39498	5.93952	4.17117	7.39066	2.65929								4.25926		2.19097
	13	1.8831	3.99568						5.10934	5.0216	2.84827	4.94735	2.36906	3.1655	2.08558	3.15875	2.54455	2.25432	2.22732	4.02268	2.65254	4.68412	4.15767	4.9406	2.36906								3.39143		1.74455
	14	1.51188	6.8777						4.3939	4.36015	2.23407	3.179	1.17441	1.80211	2.73353	3.55697	4.08342	1.28915	2.09233	5.25108	5.02835	3.19924	1.74811	4.02268	3.33423								3.25644		1.67511
	15	1.91685	1.16766						3.7932	3.61771	6.9047	3.07775	3.44897	8.30859	2.95626	4.27916	2.82127	3.90794	1.17441	4.9676	6.64147	2.28807	5.19034	3.47597	1.66037								3.76833		1.93843
	16	1.8831	1.02592						2.13283	2.30832	2.62554	3.92819	6.92495	3.96193	2.14633	3.42198	1.80886	6.37149	3.53672	2.42981	4.13742	2.17333	1.76836	2.67954	1.51863								2.98859		1.53733
	17	2.28807	1.62662						2.5378	6.56048	1.03267	4.90686	4.25216	2.97651	4.76512	5.41982	1.38364	6.16901	1.66037	0.74919	2.77403	0.661447	4.15767	0.37122									3.01626		1.55156
	18	3.50297	2.41631						2.5378	6.53348	0.519708	7.21517	5.82478	6.49973	4.74487	3.1385	1.63337	8.27484	1.37014	0.830184	4.81911	0.229482	4.81911	2.28807									3.7332		1.92036
	19	2.22057	2.57154					2.5648	7.19492	2.93602	4.25216	8.24109	5.76404	6.64822	2.31506	1.99784	0.924676	8.55157	1.86285	1.45788	2.91577	5.50756	4.54239	1.17441									3.87597		1.9938
	20	1.53888	6.51323					1.9101	6.277	1.97084	3.17225	5.48731	6.95869	6.31075	1.8561	3.05076	2.76728	5.93953	1.71436	0.769439	3.36123	6.223	8.35583	2.84827									4.05394		2.08535
	21	2.65254	11.7306					2.68629	8.7068	1.46463	6.39174	2.90902	6.76296	4.37365	1.74811	2.14633	3.52997	7.13418	2.59854	3.84719	1.59962	4.10367	6.37149	4.54239									4.48946		2.30938
	22	4.19141	11.7238					0.431965	10.3334	1.2284	5.41982	6.21625	5.09584	4.04968	3.70545	2.42306	4.27916	7.04644	3.01701	5.94627	1.16766	3.1115	7.18818	6.43224									4.89513		2.51806
	23	4.81911	10.3064					5.56156	11.7036	7.01944	9.13877	8.72705	6.35799	5.17009	3.64471	3.7932	5.24433	7.84287	4.4074	6.08801	4.44789	7.21517	7.59314	8.99028									6.74058		3.46735
		June
	#NAME?	1	2	3	4	5	6	7	8	9	10	11	12	13	14	15	16	17	18	19	20	21	22	23	24	25	26	27	28	29	30	31
	0				4.9676	0	0.37122	6.08126	7.75513	9.21301	6.59422	9.53024	11.7306	9.49649	1.17441	8.30184	3.47597	4.41415	9.98245	8.96328	9.02403												6.53387	0.5144	3.36103
	1				4.96085	2.02484	2.59854	4.3669	4.59638	8.99028	4.21841	11.3661	12.5	10.3604	4.13067	6.39849	4.87986	7.04644	10.0499	7.65389	9.66523												6.81219		3.50419
	2				5.25108	3.75945	3.30724	4.85961	0.884179	8.05211	4.25216	11.5011	11.4741	11.1569	1.53213	6.8777	5.76404	8.01836	9.55049	7.06668	5.6493												6.40921		3.2969
	3				6.10826	0.168737	2.88202	8.1061	1.94384	8.12635	6.10826	10.9611	12.0478	12.1558	3.34098	2.57154	6.22975	8.33558	10.0432	6.54698	5.12284												6.5176		3.35265
	4				3.99568	1.51188	4.87986	8.22084	7.5054	7.75513	8.61231	10.6709	11.6428	11.3863	2.33531	3.33423	7.08018	8.26809	9.64498	6.41199	8.64606												7.17071		3.68861
	5				4.53564	0.600702	5.5683	8.36258	8.33558	7.18817	8.21409	9.72597	11.6158	11.3256	2.88202	4.21841	7.4514	8.61906	11.2176	4.65038	8.44357												7.23264		3.72047
	6				2.5648	1.47813	1.2554	8.81479	7.71463	6.56048	7.01944	9.46949	13.5664	13.2424	5.96652	6.50648	8.19384	8.70005	10.2187	6.79671	8.92954												7.47046		3.84281
	7				4.65713	3.70545	0.99892	8.0791	7.84287	6.99244	6.88445	9.01728	14.2684	11.6698	9.59098	7.33666	6.99919	7.73488	10.1309	7.72813	8.85529												7.79364		4.00905
	8				2.99676	3.50297	0.715443	8.72705	7.13418	5.13634	4.84611	7.78888	12.3583	10.6709	9.75972	4.71112	4.67738	6.65497	9.81371	6.64822	8.99028												6.77249		3.48377
	9				2.96976	3.52997	0.796436	7.99136	5.04185	2.45005	2.4838	3.94168	12.5337	9.55723	4.45464	2.28807	2.99676	4.27916	5.30508	2.74703	6.13526												4.67658		2.40563
	10				2.79428	2.73353	2.68629	5.22408	3.91469	2.02484	2.65929	1.8696	10.2997	8.1331	3.6852	3.44897	3.7392	4.96085	2.65929	4.50189	3.00351												4.0199		2.06784
	11				2.88202	2.22057	3.50972	2.59854	3.30724	2.76728	3.28024	2.56479	8.44357	6.9047	2.70653	2.02484	4.16442	3.59071	2.30832	4.08342	1.57262												3.46644		1.78314
	12				3.25324	2.76728	2.68629	3.03051	2.59854	2.13958	3.28024	2.33531	5.16334	5.58855	3.46247	2.4568	4.23191	3.27349	3.1655	4.13742	1.57262												3.24371		1.66856
	13				2.88202	1.8291	2.13958	3.1115	1.49163	2.68629	1.8561	2.70653	4.04968	5.22408	3.28699	1.05292	3.19924	2.55805	4.23191	6.196	3.75945												3.07418		1.58136
	14				4.05643	2.4433	1.31614	4.50189	2.59854	2.80103	1.45788	2.82802	4.85286	4.10367	4.16442	3.1385	3.01701	4.08342	3.68521	6.16901	2.88202												3.41761		1.75802
	15				0.857181	3.28024	3.34098	2.17333	1.70761	2.47705	1.45113	1.79536	4.17117	4.25891	2.42981	3.07775	3.94168	2.4838	3.05751	6.24325													2.92167		1.50291
	16				1.8291	3.65146	4.01593	1.51863	1.74136	1.45113	3.02376	2.39606	4.65038	4.4209	3.42873	2.28132	3.25999	3.93494	1.8156	5.51431													3.05835		1.57321
	17				2.07883	0.796436	4.13742	0.431965	8.1871	1.8291	5.19708	2.42306	4.76512	0.99892	1.79536	1.54563	2.13958	7.64714	7.56614	4.73812													3.51731		1.80931
	18			0.71713	3.19924	0.431965	2.54455	0.769438	4.77187	4.25216	4.47489	1.79536	1.43089	1.8831	1.79536	2.5648	0.6277	9.59773	5.88553	3.67846													2.96589		1.52565
	19			1.14066	0.344222	0.256479	1.74811	2.74028	1.07991	2.14633	4.10367	1.02592	1.94384	2.07883	0.458963	1.11366	1.64687	7.22192	3.56372	6.00027													2.27139		1.1684
	20			0.114741	0	0.425216	2.85502	6.42549	3.1115	1.43089	7.90362	1.99784	4.17117	0.634449	3.60421	2.13958	0.229482	7.58639	7.14768	5.11609													3.22902		1.66101
	21			2.13958	0	1.05967	3.17225	7.84287	8.18035	2.57154	8.64606	5.5953	7.96436	1.65362	5.45356	4.08342	2.79428	9.99595	7.62014	3.92819													4.86477		2.50244
	22			1.9101	0	3.40173	1.42414	8.32883	9.25351	3.36123	9.32775	8.98353	8.07235	3.07775	8.04536	5.65605	5.90578	9.55724	9.12527	7.01944													6.02647		3.10002
	23			4.16442	0	2.30832	4.21841	8.70005	8.34233	5.56156	8.85529	9.67873	8.1061	3.19249	9.10502	5.74379	5.5953	9.90821	9.49649	7.59314													6.5041		3.34571
		July
	#NAME?	1	2	3	4	5	6	7	8	9	10	11	12	13	14	15	16	17	18	19	20	21	22	23	24	25	26	27	28	29	30	31	AV
	0															9.61123	11.5281	11.0894	3.57046	7.4784	8.59206	10.3267	10.7991	11.4403	11.5551	11.5281	11.3323	8.53807	6.8372	3.97543	8.27484	6.2095	8.98155	0.5144	4.62011
	1															9.90821	10.6034	11.3796	2.78078	7.84962	9.09152	10.5562	10.7991	11.1636	11.5551	10.2862	10.6304	9.63823	10.9004	4.50189	8.20059	8.22084	9.29798		4.78288
	2															10.3874	11.5753	10.3334	4.4209	7.72813	10.0567	11.1434	10.7991	10.0567	12.8442	7.5189	11.9398	9.81372	9.81372	4.07667	7.03294	7.62014	9.24478		4.75551
	3															9.50324	11.96	10.3267	3.63121	7.82937	11.6698	9.9487	10.7991	13.067	11.5483	8.02511	12.2705	11.1974	9.86096	6.53348	8.42333	10.1512	9.80855		5.04552
	4															9.80697	12.9387	11.0759	3.62446	8.79455	10.7519	9.76647	10.7991	14.9366	11.8723	8.96328	10.3132	11.9398	9.73947	7.97786	8.59881	8.76755	10.0392		5.16418
	5															11.6766	12.2705	10.2929	3.73245	8.1466	9.26701	10.4347	10.7991	13.7554	11.7981	10.9544	11.3728	10.2592	10.3267	7.62689	7.28267	8.49757	9.91138		5.09842
	6															12.6687	13.6879	10.3807	3.94843	10.7316	11.2244	11.1299	10.7991	14.6463	10.7789	10.5832	11.2581	9.90821	10.2119	7.72813	7.55265	7.62689	10.2862		5.29121
	7															11.4066	11.8723	10.4549	4.02943	10.2187	11.2041	9.92171	10.7991	14.6463	13.4584	11.2311	9.73272	11.5281	11.0286	8.55157	7.89687	7.00594	10.2933		5.29489
	8															7.80238	9.9622	9.62473	3.45572	9.84071	11.5888	9.92171	10.7991	13.9511	12.8375	9.9622	10.0499	11.2783	12.3718	7.49865	7.40416	6.41199	9.69183		4.98548
	9															6.85745	10.7789	5.56156	3.50297	7.05994	6.43224	9.92171	10.7991	10.0027	11.3728	8.84854	7.99811	9.66523	9.01728	4.75162	5.6358	4.22516	7.79007		4.00721
	10															5.14984	9.53699	2.88877	3.48272	7.87662	3.7257	7.73488	10.7991	8.19384	9.93521	6.78321	6.04077	6.38499	5.31857	3.10475	6.43224	2.31731	6.21797		3.19853
	11															3.64471	7.33666	2.76053	3.14525	5.69654	2.88202	4.79212	5.81129	5.79104	8.39633	4.20491	3.7527	4.82586	3.43548	5.38607	4.9946		4.80351		2.47092
	12															3.15875	4.27916	4.06992	2.32181	4.22516	1.93709	2.5108	3.40173	5.54131	4.27916	5.09584	2.5378	5.0216	4.40065	3.18574	6.9317		3.93114		2.02218
	13														7.08693	2.90227	3.90119	4.05643	3.32748	3.40173	2.06533	1.99784	3.63796	4.61663	1.49838	3.90119	3.58396	3.67846	5.54806	4.82586	5.83828		3.87459		1.99309
	14														7.26242	3.62446	3.50972	3.7797	2.88202	2.61204	2.28132	2.55805	2.21382	2.68629	2.53105	2.5108	2.28807	2.38931	6.83045	5.27133	4.72462		3.52679		1.81418
	15														7.12743	3.1385	2.80778	4.15092	1.17441	3.34773	3.50297	3.73245	1.46463	4.10367	1.24865	3.36123	6.31074	2.40956	7.87662	3.85394	3.63121		3.72014		1.91364
	16														6.06102	3.46247	3.63121	7.4784	2.75378	1.19465	2.66604	2.09233	1.8156	3.30049	0	5.61555	10.3807	5.77079	5.46031	2.76053	3.89444		4.0199		2.06784
	17														5.5953	2.82802	3.179	4.00918	1.02592	3.06426	0.99892	5.21733	0.37122	5.07559	2.09233	3.1385	7.65389	1.97084	3.48272	3.35448	3.20599		3.30962		1.70247
	18														6.18251	4.50189	5.58855	0	1.24865	1.38364	1.8696	9.02403	0.37122	6.60772	2.65254	3.7257	4.04293	5.08909	8.91604	1.97084	4.86636		4.00243		2.05885
	19														8.7203	7.08018	3.25324	1.80211	1.39039	3.20599	4.9811	11.3053	0.37122	7.76863	4.60313	3.03051	2.34206	3.55022	10.6304	2.08558	4.4209		4.73772		2.43709
	20														10.5359	6.97894	3.25324	3.70545	3.88094	4.02268	8.1196	11.6766	0.37122	9.83396	7.74838	4.12392	3.63121	3.47597	8.71355	2.11933	2.75378		5.58498		2.87291
	21														10.7519	8.1736	6.53348	2.36231	5.33882	6.45923	9.78672	11.6766	0.37122	9.43575	7.62014	2.01809	4.23191	4.17792	9.9352	5.83153	7.96436		6.62757		3.40922
	22														10.2254	9.93521	9.13877	4.24541	5.21058	9.70572	9.30751	10.7991	0.37122	10.1309	3.48272	5.87203	3.62446	3.52997	9.01053	8.22759	6.9317		7.04405		3.62346
	23														10.9071	11.6766	10.1377	4.05643	6.99919	9.78672	9.64498	10.7991	9.22651	11.9465	7.59989	9.74622	7.28267	3.57721	6.78321	8.44357	6.70896		8.54839		4.39729
