# Supplementary material for: Determination of the Surface Roughness Parameter and Wind Shear Exponent of Kisii Region from the On-Site Measurement of Wind Profiles
Source: Hindawi journal article supplement (doi:10.1155/2019/8264061), 2019-07-01
Supplement: f1 [file 8264061.f1.zip › 8264061.f1/Kisii B(Autosaved).xlsx]

## Sheet: Sheet1
2018-07-31	6.2095
2018-07-31 00:12:00	6.58072		0	6.2095
2018-07-31 00:24:00	5.97327		1	8.22084
2018-07-31 00:36:00	6.44573		2	7.62014
2018-07-31 00:48:00	5.83828		3	10.1512
2018-07-31 01:00:00	7.82937		4	8.76755
2018-07-31 01:12:00	8.94303		5	8.49757
2018-07-31 01:24:00	8.43683		6	7.62689
2018-07-31 01:36:00	7.82937		7	7.00594
2018-07-31 01:48:00	8.0656		8	6.41199
2018-07-31 02:00:00	7.32316		9	4.22516
2018-07-31 02:12:00	6.81696		10	2.31731
2018-07-31 02:24:00	7.45815		11	#DIV/0!
2018-07-31 02:36:00	8.80804		12	#DIV/0!
2018-07-31 02:48:00	7.69438		13	#DIV/0!
2018-07-31 03:00:00	9.07802		14	#DIV/0!
2018-07-31 03:12:00	10.6641		15	#DIV/0!
2018-07-31 03:24:00	10.2929		16	#DIV/0!
2018-07-31 03:36:00	9.92171		17	#DIV/0!
2018-07-31 03:48:00	10.7991		18	#DIV/0!
2018-07-31 04:00:00	9.55049		19	#DIV/0!
2018-07-31 04:12:00	10.4279		20	#DIV/0!
2018-07-31 04:24:00	9.07802		21	#DIV/0!
2018-07-31 04:36:00	8.57182		22	#DIV/0!
2018-07-31 04:48:00	6.2095		23	#DIV/0!
2018-07-31 05:00:00	8.94303
2018-07-31 05:12:00	10.6641
2018-07-31 05:24:00	7.45815
2018-07-31 05:36:00	7.08693
2018-07-31 05:48:00	8.33558
2018-07-31 06:00:00	8.94303
2018-07-31 06:12:00	7.45815
2018-07-31 06:24:00	6.58072
2018-07-31 06:36:00	8.0656
2018-07-31 06:48:00	7.08693
2018-07-31 07:00:00	8.7068
2018-07-31 07:12:00	7.96436
2018-07-31 07:24:00	5.70329
2018-07-31 07:36:00	5.46706
2018-07-31 07:48:00	7.18818
2018-07-31 08:00:00	5.83828
2018-07-31 08:12:00	6.58072
2018-07-31 08:24:00	6.2095
2018-07-31 08:36:00	7.08693
2018-07-31 08:48:00	6.34449
2018-07-31 09:00:00	5.33207
2018-07-31 09:12:00	4.58963
2018-07-31 09:24:00	4.48839
2018-07-31 09:36:00	2.59854
2018-07-31 09:48:00	4.11717
2018-07-31 10:00:00	2.22732
2018-07-31 10:12:00	3.23974
2018-07-31 10:24:00	1.48488
2018-07-18	3.1385
2018-07-18 00:12:00	2.86852
2018-07-18 00:24:00	0.134989
2018-07-18 00:36:00	2.5648
2018-07-18 00:48:00	3.27349
2018-07-18 01:00:00	3.1385
2018-07-18 01:12:00	2.69978
2018-07-18 01:24:00	2.86852
2018-07-18 01:36:00	3.7122
2018-07-18 01:48:00	3.00351
2018-07-18 02:00:00	4.28591
2018-07-18 02:12:00	2.5648
2018-07-18 02:24:00	4.55588
2018-07-18 02:36:00	4.55588
2018-07-18 02:48:00	4.55588
2018-07-18 03:00:00	4.11717
2018-07-18 03:12:00	3.7122
2018-07-18 03:24:00	3.1385
2018-07-18 03:36:00	3.40848
2018-07-18 03:48:00	4.69088
2018-07-18 04:00:00	2.12608
2018-07-18 04:12:00	2.29482
2018-07-18 04:24:00	4.28591
2018-07-18 04:36:00	4.55588
2018-07-18 04:48:00	3.57721
2018-07-18 05:00:00	4.11717
2018-07-18 05:12:00	4.85961
2018-07-18 05:24:00	4.9946
2018-07-18 05:36:00	3.57721
2018-07-18 05:48:00	1.8561
2018-07-18 06:00:00	2.86852
2018-07-18 06:12:00	3.98218
2018-07-18 06:24:00	3.27349
2018-07-18 06:36:00	4.85961
2018-07-18 06:48:00	4.85961
2018-07-18 07:00:00	3.40848
2018-07-18 07:12:00	3.98218
2018-07-18 07:24:00	3.40848
2018-07-18 07:36:00	4.69088
2018-07-18 07:48:00	4.4209
2018-07-18 08:00:00	3.7122
2018-07-18 08:12:00	3.27349
2018-07-18 08:24:00	0
2018-07-18 08:36:00	1.41739
2018-07-18 08:48:00	2.83477
2018-07-18 09:00:00	4.11717
2018-07-18 09:12:00	2.12608
2018-07-18 09:24:00	3.84719
2018-07-18 09:36:00	3.7122
2018-07-18 09:48:00	1.58612
2018-07-18 10:00:00	4.85961
2018-07-18 10:12:00	3.44223
2018-07-18 10:24:00	3.98218
2018-07-18 10:36:00	0.269978
2018-07-18 10:48:00	2.29482
2018-07-18 11:00:00	2.29482
2018-07-18 11:12:00	3.00351
2018-07-18 11:24:00	1.58612
2018-07-18 11:36:00	0
2018-07-18 11:48:00	2.12608
2018-07-18 12:00:00	1.45113
2018-07-18 12:12:00	0
2018-07-18 12:24:00	0
2018-07-18 12:36:00	0.573704
2018-07-18 12:48:00	0.269978
2018-07-18 13:00:00	1.58612
2018-07-18 13:12:00	3.44223
2018-07-18 13:24:00	2.12608
2018-07-18 13:36:00	0
2018-07-18 13:48:00	4.4209
2018-07-18 14:00:00	3.98218
2018-07-18 14:12:00	1.99109
2018-07-18 14:24:00	3.00351
2018-07-18 14:36:00	0.573704
2018-07-18 14:48:00	4.69088
2018-07-18 15:00:00	2.69978
2018-07-18 15:12:00	1.01242
2018-07-18 15:24:00	0
2018-07-18 15:36:00	0
2018-07-18 15:48:00	0
2018-07-18 16:00:00	0
2018-07-18 16:12:00	0
2018-07-18 16:24:00	2.5648
2018-07-18 16:36:00	1.8561
2018-07-18 16:48:00	2.29482
2018-07-18 17:00:00	1.01242
2018-07-18 17:12:00	0.708693
2018-07-18 17:24:00	0
2018-07-18 17:36:00	0
2018-07-18 17:48:00	0
2018-07-18 18:00:00	0
2018-07-18 18:12:00	0
2018-07-18 18:24:00	0
2018-07-18 18:36:00	0
2018-07-18 18:48:00	0
2018-07-18 19:00:00	0
2018-07-18 19:12:00	0
2018-07-18 19:24:00	0
2018-07-18 19:36:00	0
2018-07-18 19:48:00	0
2018-07-18 20:00:00	0
2018-07-18 20:12:00	0
2018-07-18 20:24:00	0
2018-07-18 20:36:00	0
2018-07-18 20:48:00	6.00702
2018-07-18 21:00:00	6.41199
2018-07-18 21:12:00	5.43332
2018-07-18 21:24:00	5.12959
2018-07-18 21:36:00	3.98218
2018-07-18 21:48:00	4.28591
2018-07-18 22:00:00	4.11717
2018-07-18 22:12:00	4.85961
2018-07-18 22:24:00	2.69978
2018-07-18 22:36:00	4.9946
2018-07-18 22:48:00	6.58072
2018-07-18 23:00:00	7.42441
2018-07-18 23:12:00	6.54698
2018-07-18 23:24:00	7.5594
2018-07-18 23:36:00	7.42441
2018-07-18 23:48:00	6.8507
2018-07-19	6.41199
2018-07-19 00:12:00	6.58072
2018-07-19 00:24:00	7.28942
2018-07-19 00:36:00	7.12068
2018-07-19 00:48:00	6.71571
2018-07-19 01:00:00	7.69438
2018-07-19 01:12:00	7.28942
2018-07-19 01:24:00	7.69438
2018-07-19 01:36:00	6.58072
2018-07-19 01:48:00	6.98569
2018-07-19 02:00:00	8.26809
2018-07-19 02:12:00	7.12068
2018-07-19 02:24:00	7.99811
2018-07-19 02:36:00	6.8507
2018-07-19 02:48:00	7.42441
2018-07-19 03:00:00	7.86312
2018-07-19 03:12:00	6.00702
2018-07-19 03:24:00	8.26809
2018-07-19 03:36:00	8.84179
2018-07-19 03:48:00	7.86312
2018-07-19 04:00:00	9.14552
2018-07-19 04:12:00	9.4155
2018-07-19 04:24:00	9.68548
2018-07-19 04:36:00	8.97678
2018-07-19 04:48:00	8.84179
2018-07-19 05:00:00	7.28942
2018-07-19 05:12:00	6.98569
2018-07-19 05:24:00	6.8507
2018-07-19 05:36:00	8.1331
2018-07-19 05:48:00	9.14552
2018-07-19 06:00:00	8.40308
2018-07-19 06:12:00	9.55049
2018-07-19 06:24:00	10.5629
2018-07-19 06:36:00	9.55049
2018-07-19 06:48:00	10.5629
2018-07-19 07:00:00	11.5416
2018-07-19 07:12:00	9.4155
2018-07-19 07:24:00	10.4279
2018-07-19 07:36:00	10.1242
2018-07-19 07:48:00	9.85421
2018-07-19 08:00:00	11.9803
2018-07-19 08:12:00	10.4279
2018-07-19 08:24:00	11.5753
2018-07-19 08:36:00	9.14552
2018-07-19 08:48:00	6.14201
2018-07-19 09:00:00	6.277
2018-07-19 09:12:00	7.86312
2018-07-19 09:24:00	6.14201
2018-07-19 09:36:00	6.58072
2018-07-19 09:48:00	6.58072
2018-07-19 10:00:00	6.41199
2018-07-19 10:12:00	8.1331
2018-07-19 10:24:00	6.71571
2018-07-19 10:36:00	5.12959
2018-07-19 10:48:00	5.12959
2018-07-19 11:00:00	6.71571
2018-07-19 11:12:00	5.70329
2018-07-19 11:24:00	5.12959
2018-07-19 11:36:00	6.277
2018-07-19 11:48:00	3.1385
2018-07-19 12:00:00	4.55588
2018-07-19 12:12:00	6.8507
2018-07-19 12:24:00	4.72462
2018-07-19 12:36:00	3.98218
2018-07-19 12:48:00	3.7122
2018-07-19 13:00:00	1.99109
2018-07-19 13:12:00	4.55588
2018-07-19 13:24:00	0.573704
2018-07-19 13:36:00	2.29482
2018-07-19 13:48:00	3.84719
2018-07-19 14:00:00	2.69978
2018-07-19 14:12:00	3.7122
2018-07-19 14:24:00	2.69978
2018-07-19 14:36:00	1.8561
2018-07-19 14:48:00	1.58612
2018-07-19 15:00:00	0.438715
2018-07-19 15:12:00	3.00351
2018-07-19 15:24:00	1.2824
2018-07-19 15:36:00	2.86852
2018-07-19 15:48:00	2.12608
2018-07-19 16:00:00	3.27349
2018-07-19 16:12:00	1.58612
2018-07-19 16:24:00	0
2018-07-19 16:36:00	1.41739
2018-07-19 16:48:00	0.134989
2018-07-19 17:00:00	0
2018-07-19 17:12:00	1.72111
2018-07-19 17:24:00	0.438715
2018-07-19 17:36:00	1.14741
2018-07-19 17:48:00	5.43332
2018-07-19 18:00:00	4.4209
2018-07-19 18:12:00	1.58612
2018-07-19 18:24:00	1.01242
2018-07-19 18:36:00	0.303726
2018-07-19 18:48:00	0
2018-07-19 19:00:00	0
2018-07-19 19:12:00	2.86852
2018-07-19 19:24:00	4.15092
2018-07-19 19:36:00	3.00351
2018-07-19 19:48:00	0.708693
2018-07-19 20:00:00	3.1385
2018-07-19 20:12:00	3.27349
2018-07-19 20:24:00	3.84719
2018-07-19 20:36:00	4.69088
2018-07-19 20:48:00	1.41739
2018-07-19 21:00:00	2.42981
2018-07-19 21:12:00	5.12959
2018-07-19 21:24:00	5.12959
2018-07-19 21:36:00	5.5683
2018-07-19 21:48:00	6.71571
2018-07-19 22:00:00	6.98569
2018-07-19 22:12:00	7.15443
2018-07-19 22:24:00	8.57182
2018-07-19 22:36:00	8.7068
2018-07-19 22:48:00	9.4155
2018-07-19 23:00:00	9.9892
2018-07-19 23:12:00	9.85421
2018-07-19 23:24:00	11.1366
2018-07-19 23:36:00	7.86312
2018-07-19 23:48:00	7.28942
2018-07-20	10.1242
2018-07-20 00:12:00	8.40308
2018-07-20 00:24:00	8.7068
2018-07-20 00:36:00	7.5594
2018-07-20 00:48:00	8.57182
2018-07-20 01:00:00	8.97678
2018-07-20 01:12:00	8.53807
2018-07-20 01:24:00	8.40308
2018-07-20 01:36:00	7.69438
2018-07-20 01:48:00	8.40308
2018-07-20 02:00:00	7.99811
2018-07-20 02:12:00	7.99811
2018-07-20 02:24:00	10.2929
2018-07-20 02:36:00	9.14552
2018-07-20 02:48:00	10.2592
2018-07-20 03:00:00	10.4279
2018-07-20 03:12:00	11.8453
2018-07-20 03:24:00	11.5416
2018-07-20 03:36:00	9.9892
2018-07-20 03:48:00	10.2592
2018-07-20 04:00:00	10.8329
2018-07-20 04:12:00	9.71922
2018-07-20 04:24:00	9.55049
2018-07-20 04:36:00	10.1242
2018-07-20 04:48:00	8.97678
2018-07-20 05:00:00	8.97678
2018-07-20 05:12:00	9.55049
2018-07-20 05:24:00	9.4155
2018-07-20 05:36:00	10.6979
2018-07-20 05:48:00	9.14552
2018-07-20 06:00:00	11.1366
2018-07-20 06:12:00	9.9892
2018-07-20 06:24:00	10.6979
2018-07-20 06:36:00	11.8453
2018-07-20 06:48:00	11.5416
2018-07-20 07:00:00	10.4279
2018-07-20 07:12:00	11.2716
2018-07-20 07:24:00	10.6979
2018-07-20 07:36:00	11.7103
2018-07-20 07:48:00	8.1331
2018-07-20 08:00:00	10.8329
2018-07-20 08:12:00	12.9927
2018-07-20 08:24:00	11.2716
2018-07-20 08:36:00	9.4155
2018-07-20 08:48:00	8.43683
2018-07-20 09:00:00	8.84179
2018-07-20 09:12:00	8.7068
2018-07-20 09:24:00	6.8507
2018-07-20 09:36:00	7.12068
2018-07-20 09:48:00	4.9946
2018-07-20 10:00:00	5.29833
2018-07-20 10:12:00	3.27349
2018-07-20 10:24:00	3.98218
2018-07-20 10:36:00	6.14201
2018-07-20 10:48:00	0.573704
2018-07-20 11:00:00	1.8561
2018-07-20 11:12:00	1.99109
2018-07-20 11:24:00	3.27349
2018-07-20 11:36:00	0.708693
2018-07-20 11:48:00	0
2018-07-20 12:00:00	2.86852
2018-07-20 12:12:00	1.01242
2018-07-20 12:24:00	1.2824
2018-07-20 12:36:00	4.11717
2018-07-20 12:48:00	0
2018-07-20 13:00:00	0
2018-07-20 13:12:00	1.2824
2018-07-20 13:24:00	2.69978
2018-07-20 13:36:00	0
2018-07-20 13:48:00	3.84719
2018-07-20 14:00:00	2.69978
2018-07-20 14:12:00	1.8561
2018-07-20 14:24:00	0
2018-07-20 14:36:00	3.57721
2018-07-20 14:48:00	0
2018-07-20 15:00:00	1.58612
2018-07-20 15:12:00	4.4209
2018-07-20 15:24:00	1.72111
2018-07-20 15:36:00	1.8561
2018-07-20 15:48:00	3.1385
2018-07-20 16:00:00	6.98569
2018-07-20 16:12:00	3.84719
2018-07-20 16:24:00	0
2018-07-20 16:36:00	0
2018-07-20 16:48:00	0
2018-07-20 17:00:00	0
2018-07-20 17:12:00	0
2018-07-20 17:24:00	0.269978
2018-07-20 17:36:00	0.134989
2018-07-20 17:48:00	0
2018-07-20 18:00:00	0
2018-07-20 18:12:00	0.573704
2018-07-20 18:24:00	0
2018-07-20 18:36:00	0
2018-07-20 18:48:00	2.12608
2018-07-20 19:00:00	0.134989
2018-07-20 19:12:00	4.4209
2018-07-20 19:24:00	6.277
2018-07-20 19:36:00	4.85961
2018-07-20 19:48:00	4.85961
2018-07-20 20:00:00	5.12959
2018-07-20 20:12:00	6.00702
2018-07-20 20:24:00	7.5594
2018-07-20 20:36:00	8.1331
2018-07-20 20:48:00	7.15443
2018-07-20 21:00:00	8.97678
2018-07-20 21:12:00	8.7068
2018-07-20 21:24:00	7.86312
2018-07-20 21:36:00	9.28051
2018-07-20 21:48:00	8.7068
2018-07-20 22:00:00	8.84179
2018-07-20 22:12:00	8.1331
2018-07-20 22:24:00	7.99811
2018-07-20 22:36:00	8.7068
2018-07-20 22:48:00	9.68548
2018-07-20 23:00:00	9.28051
2018-07-20 23:12:00	8.84179
2018-07-20 23:24:00	9.14552
2018-07-20 23:36:00	10.4279
2018-07-20 23:48:00	9.55049
2018-07-21	9.55049
2018-07-21 00:12:00	7.82937
2018-07-21 00:24:00	10.5629
2018-07-21 00:36:00	8.84179
2018-07-21 00:48:00	10.4279
2018-07-21 01:00:00	10.1242
2018-07-21 01:12:00	11.2716
2018-07-21 01:24:00	10.2592
2018-07-21 01:36:00	11.1366
2018-07-21 01:48:00	9.4155
2018-07-21 02:00:00	11.1366
2018-07-21 02:12:00	10.4279
2018-07-21 02:24:00	11.7103
2018-07-21 02:36:00	10.5629
2018-07-21 02:48:00	8.57182
2018-07-21 03:00:00	10.1242
2018-07-21 03:12:00	9.55049
2018-07-21 03:24:00	9.14552
2018-07-21 03:36:00	10.5629
2018-07-21 03:48:00	9.4155
2018-07-21 04:00:00	9.68548
2018-07-21 04:12:00	9.55049
2018-07-21 04:24:00	9.4155
2018-07-21 04:36:00	11.0016
2018-07-21 04:48:00	10.4279
2018-07-21 05:00:00	9.11177
2018-07-21 05:12:00	9.28051
2018-07-21 05:24:00	9.55049
2018-07-21 05:36:00	9.55049
2018-07-21 05:48:00	10.4279
2018-07-21 06:00:00	10.2592
2018-07-21 06:12:00	11.4066
2018-07-21 06:24:00	10.6979
2018-07-21 06:36:00	8.84179
2018-07-21 06:48:00	11.9803
2018-07-21 07:00:00	9.68548
2018-07-21 07:12:00	10.8329
2018-07-21 07:24:00	11.1366
2018-07-21 07:36:00	10.4279
2018-07-21 07:48:00	9.14552
2018-07-21 08:00:00	10.2592
2018-07-21 08:12:00	11.7103
2018-07-21 08:24:00	11.4066
2018-07-21 08:36:00	10.8329
2018-07-21 08:48:00	9.4155
2018-07-21 09:00:00	10.5629
2018-07-21 09:12:00	6.98569
2018-07-21 09:24:00	7.82937
2018-07-21 09:36:00	6.8507
2018-07-21 09:48:00	6.00702
2018-07-21 10:00:00	7.15443
2018-07-21 10:12:00	4.9946
2018-07-21 10:24:00	6.277
2018-07-21 10:36:00	4.85961
2018-07-21 10:48:00	5.29833
2018-07-21 11:00:00	2.42981
2018-07-21 11:12:00	5.5683
2018-07-21 11:24:00	4.69088
2018-07-21 11:36:00	2.86852
2018-07-21 11:48:00	3.27349
2018-07-21 12:00:00	3.00351
2018-07-21 12:12:00	0.134989
2018-07-21 12:24:00	3.84719
2018-07-21 12:36:00	2.5648
2018-07-21 12:48:00	0.134989
2018-07-21 13:00:00	0
2018-07-21 13:12:00	0
2018-07-21 13:24:00	3.7122
2018-07-21 13:36:00	0
2018-07-21 13:48:00	0
2018-07-21 14:00:00	0
2018-07-21 14:12:00	0
2018-07-21 14:24:00	4.28591
2018-07-21 14:36:00	4.11717
2018-07-21 14:48:00	3.1385
2018-07-21 15:00:00	3.27349
2018-07-21 15:12:00	1.41739
2018-07-21 15:24:00	0.843683
2018-07-21 15:36:00	2.5648
2018-07-21 15:48:00	3.1385
2018-07-21 16:00:00	2.86852
2018-07-21 16:12:00	0
2018-07-21 16:24:00	0
2018-07-21 16:36:00	0
2018-07-21 16:48:00	0
2018-07-21 17:00:00	0
2018-07-21 17:12:00	0
2018-07-21 17:24:00	5.83828
2018-07-21 17:36:00	6.71571
2018-07-21 17:48:00	7.99811
2018-07-21 18:00:00	7.99811
2018-07-21 18:12:00	8.84179
2018-07-21 18:24:00	11.1366
2018-07-21 18:36:00	12.554
2018-07-21 18:48:00	10.9679
2018-07-21 19:00:00	10.8329
2018-07-21 19:12:00	10.6979
2018-07-21 19:24:00	9.28051
2018-07-21 19:36:00	12.689
2018-07-21 19:48:00	10.1242
2018-07-21 20:00:00	9.85421
2018-07-21 20:12:00	10.6979
2018-07-21 20:24:00	9.11177
2018-07-21 20:36:00	8.26809
2018-07-21 20:48:00	10.5629
2018-07-21 21:00:00	8.84179
2018-07-21 21:12:00	13.1277
2018-07-21 21:24:00	9.85421
2018-07-21 21:36:00	10.8329
2018-07-21 21:48:00	11.1366
2018-07-21 22:00:00	10.8329
2018-07-21 22:12:00	9.28051
2018-07-21 22:24:00	11.5416
2018-07-21 22:36:00	11.2716
2018-07-21 22:48:00	11.7103
2018-07-21 23:00:00	14.9838
2018-07-21 23:12:00	12.689
2018-07-21 23:24:00	12.1153
2018-07-21 23:36:00	10.8329
2018-07-21 23:48:00	12.9927
2018-07-22	11.7103
2018-07-22 00:12:00	10.5629
2018-07-22 00:24:00	11.9803
2018-07-22 00:36:00	13.9714
2018-07-22 00:48:00	13.1277
2018-07-22 01:00:00	12.8577
2018-07-22 01:12:00	12.9927
2018-07-22 01:24:00	11.8453
2018-07-22 01:36:00	10.6979
2018-07-22 01:48:00	13.8364
2018-07-22 02:00:00	12.8577
2018-07-22 02:12:00	12.1153
2018-07-22 02:24:00	11.4066
2018-07-22 02:36:00	12.8577
2018-07-22 02:48:00	10.6979
2018-07-22 03:00:00	11.7103
2018-07-22 03:12:00	12.419
2018-07-22 03:24:00	11.4066
2018-07-22 03:36:00	10.6979
2018-07-22 03:48:00	9.71922
2018-07-22 04:00:00	11.5753
2018-07-22 04:12:00	12.1153
2018-07-22 04:24:00	12.284
2018-07-22 04:36:00	10.2592
2018-07-22 04:48:00	9.9892
2018-07-22 05:00:00	11.5753
2018-07-22 05:12:00	13.5664
2018-07-22 05:24:00	12.8577
2018-07-22 05:36:00	12.9927
2018-07-22 05:48:00	15.5575
2018-07-22 06:00:00	13.2627
2018-07-22 06:12:00	13.2627
2018-07-22 06:24:00	13.2627
2018-07-22 06:36:00	14.9838
2018-07-22 06:48:00	11.7103
2018-07-22 07:00:00	13.8364
2018-07-22 07:12:00	15.4225
2018-07-22 07:24:00	13.2627
2018-07-22 07:36:00	12.689
2018-07-22 07:48:00	13.8364
2018-07-22 08:00:00	12.9927
2018-07-22 08:12:00	9.68548
2018-07-22 08:24:00	13.3977
2018-07-22 08:36:00	14.7138
2018-07-22 08:48:00	12.1153
2018-07-22 09:00:00	12.419
2018-07-22 09:12:00	10.5629
2018-07-22 09:24:00	10.4279
2018-07-22 09:36:00	9.71922
2018-07-22 09:48:00	8.43683
2018-07-22 10:00:00	10.4279
2018-07-22 10:12:00	8.7068
2018-07-22 10:24:00	7.99811
2018-07-22 10:36:00	6.58072
2018-07-22 10:48:00	6.8507
2018-07-22 11:00:00	4.72462
2018-07-22 11:12:00	4.4209
2018-07-22 11:24:00	3.27349
2018-07-22 11:36:00	2.69978
2018-07-22 11:48:00	4.4209
2018-07-22 12:00:00	4.4209
2018-07-22 12:12:00	4.85961
2018-07-22 12:24:00	3.27349
2018-07-22 12:36:00	4.72462
2018-07-22 12:48:00	2.15983
2018-07-22 13:00:00	0
2018-07-22 13:12:00	1.8561
2018-07-22 13:24:00	1.2824
2018-07-22 13:36:00	4.28591
2018-07-22 13:48:00	0.438715
2018-07-22 14:00:00	2.12608
2018-07-22 14:12:00	2.12608
2018-07-22 14:24:00	2.29482
2018-07-22 14:36:00	0
2018-07-22 14:48:00	0.708693
2018-07-22 15:00:00	4.28591
2018-07-22 15:12:00	0.87743
2018-07-22 15:24:00	0.573704
2018-07-22 15:36:00	1.58612
2018-07-22 15:48:00	3.1385
2018-07-22 16:00:00	1.14741
2018-07-22 16:12:00	1.14741
2018-07-22 16:24:00	2.29482
2018-07-22 16:36:00	0
2018-07-22 16:48:00	1.99109
2018-07-22 17:00:00	2.12608
2018-07-22 17:12:00	3.27349
2018-07-22 17:24:00	2.12608
2018-07-22 17:36:00	0
2018-07-22 17:48:00	5.43332
2018-07-22 18:00:00	7.15443
2018-07-22 18:12:00	5.70329
2018-07-22 18:24:00	2.69978
2018-07-22 18:36:00	6.14201
2018-07-22 18:48:00	6.41199
2018-07-22 19:00:00	8.1331
2018-07-22 19:12:00	7.28942
2018-07-22 19:24:00	5.83828
2018-07-22 19:36:00	8.97678
2018-07-22 19:48:00	7.99811
2018-07-22 20:00:00	7.5594
2018-07-22 20:12:00	11.9803
2018-07-22 20:24:00	9.55049
2018-07-22 20:36:00	9.01053
2018-07-22 20:48:00	7.99811
2018-07-22 21:00:00	7.82937
2018-07-22 21:12:00	10.4279
2018-07-22 21:24:00	11.2716
2018-07-22 21:36:00	9.85421
2018-07-22 21:48:00	7.69438
2018-07-22 22:00:00	10.5629
2018-07-22 22:12:00	13.8364
2018-07-22 22:24:00	11.2716
2018-07-22 22:36:00	12.9927
2018-07-22 22:48:00	11.4066
2018-07-22 23:00:00	13.5664
2018-07-22 23:12:00	10.8329
2018-07-22 23:24:00	12.554
2018-07-22 23:36:00	12.1153
2018-07-22 23:48:00	12.689
2018-07-23	13.3977
2018-07-23 00:12:00	12.419
2018-07-23 00:24:00	11.7103
2018-07-23 00:36:00	10.8329
2018-07-23 00:48:00	12.419
2018-07-23 01:00:00	12.554
2018-07-23 01:12:00	10.6979
2018-07-23 01:24:00	11.8453
2018-07-23 01:36:00	11.0016
2018-07-23 01:48:00	12.554
2018-07-23 02:00:00	10.8329
2018-07-23 02:12:00	10.2929
2018-07-23 02:24:00	12.1153
2018-07-23 02:36:00	12.8577
2018-07-23 02:48:00	12.149
2018-07-23 03:00:00	14.5451
2018-07-23 03:12:00	13.1277
2018-07-23 03:24:00	12.9927
2018-07-23 03:36:00	13.2627
2018-07-23 03:48:00	14.2751
2018-07-23 04:00:00	14.9838
2018-07-23 04:12:00	12.419
2018-07-23 04:24:00	13.2627
2018-07-23 04:36:00	10.4279
2018-07-23 04:48:00	12.689
2018-07-23 05:00:00	11.5753
2018-07-23 05:12:00	12.8577
2018-07-23 05:24:00	12.554
2018-07-23 05:36:00	11.4066
2018-07-23 05:48:00	14.5451
2018-07-23 06:00:00	14.9838
2018-07-23 06:12:00	14.4101
2018-07-23 06:24:00	12.9927
2018-07-23 06:36:00	13.8364
2018-07-23 06:48:00	12.284
2018-07-23 07:00:00	13.7014
2018-07-23 07:12:00	13.5664
2018-07-23 07:24:00	10.8329
2018-07-23 07:36:00	12.419
2018-07-23 07:48:00	11.5753
2018-07-23 08:00:00	11.5416
2018-07-23 08:12:00	15.1188
2018-07-23 08:24:00	10.9679
2018-07-23 08:36:00	10.1242
2018-07-23 08:48:00	12.554
2018-07-23 09:00:00	8.7068
2018-07-23 09:12:00	8.7068
2018-07-23 09:24:00	11.0016
2018-07-23 09:36:00	6.8507
2018-07-23 09:48:00	6.8507
2018-07-23 10:00:00	9.85421
2018-07-23 10:12:00	6.8507
2018-07-23 10:24:00	5.29833
2018-07-23 10:36:00	9.4155
2018-07-23 10:48:00	8.26809
2018-07-23 11:00:00	6.14201
2018-07-23 11:12:00	5.5683
2018-07-23 11:24:00	5.83828
2018-07-23 11:36:00	3.00351
2018-07-23 11:48:00	3.98218
2018-07-23 12:00:00	5.26458
2018-07-23 12:12:00	4.4209
2018-07-23 12:24:00	4.69088
2018-07-23 12:36:00	8.1331
2018-07-23 12:48:00	5.29833
2018-07-23 13:00:00	3.57721
2018-07-23 13:12:00	4.85961
2018-07-23 13:24:00	2.69978
2018-07-23 13:36:00	4.55588
2018-07-23 13:48:00	1.8561
2018-07-23 14:00:00	3.57721
2018-07-23 14:12:00	0
2018-07-23 14:24:00	0.134989
2018-07-23 14:36:00	0.843683
2018-07-23 14:48:00	2.86852
2018-07-23 15:00:00	0
2018-07-23 15:12:00	6.277
2018-07-23 15:24:00	4.15092
2018-07-23 15:36:00	3.1385
2018-07-23 15:48:00	2.86852
2018-07-23 16:00:00	3.27349
2018-07-23 16:12:00	0
2018-07-23 16:24:00	1.01242
2018-07-23 16:36:00	3.84719
2018-07-23 16:48:00	4.15092
2018-07-23 17:00:00	3.27349
2018-07-23 17:12:00	3.1385
2018-07-23 17:24:00	4.28591
2018-07-23 17:36:00	5.5683
2018-07-23 17:48:00	6.14201
2018-07-23 18:00:00	7.15443
2018-07-23 18:12:00	4.28591
2018-07-23 18:24:00	4.9946
2018-07-23 18:36:00	5.83828
2018-07-23 18:48:00	6.98569
2018-07-23 19:00:00	5.26458
2018-07-23 19:12:00	6.14201
2018-07-23 19:24:00	8.7068
2018-07-23 19:36:00	8.40308
2018-07-23 19:48:00	7.42441
2018-07-23 20:00:00	7.69438
2018-07-23 20:12:00	9.14552
2018-07-23 20:24:00	11.4066
2018-07-23 20:36:00	11.7103
2018-07-23 20:48:00	11.7103
2018-07-23 21:00:00	7.42441
2018-07-23 21:12:00	10.2592
2018-07-23 21:24:00	10.6979
2018-07-23 21:36:00	7.86312
2018-07-23 21:48:00	8.57182
2018-07-23 22:00:00	9.55049
2018-07-23 22:12:00	8.84179
2018-07-23 22:24:00	9.55049
2018-07-23 22:36:00	9.85421
2018-07-23 22:48:00	10.2592
2018-07-23 23:00:00	12.419
2018-07-23 23:12:00	9.85421
2018-07-23 23:24:00	9.85421
2018-07-23 23:36:00	11.2716
2018-07-23 23:48:00	12.554
2018-07-24	10.4279
2018-07-24 00:12:00	10.6979
2018-07-24 00:24:00	10.1242
2018-07-24 00:36:00	11.2716
2018-07-24 00:48:00	9.85421
2018-07-24 01:00:00	11.0016
2018-07-24 01:12:00	13.2627
2018-07-24 01:24:00	8.7068
2018-07-24 01:36:00	10.1242
2018-07-24 01:48:00	10.4279
2018-07-24 02:00:00	13.1277
2018-07-24 02:12:00	11.0016
2018-07-24 02:24:00	10.9679
2018-07-24 02:36:00	12.284
2018-07-24 02:48:00	9.4155
2018-07-24 03:00:00	10.1242
2018-07-24 03:12:00	10.1242
2018-07-24 03:24:00	11.2716
2018-07-24 03:36:00	9.9892
2018-07-24 03:48:00	11.1366
2018-07-24 04:00:00	11.8453
2018-07-24 04:12:00	10.2929
2018-07-24 04:24:00	10.6979
2018-07-24 04:36:00	11.2716
2018-07-24 04:48:00	11.0016
2018-07-24 05:00:00	10.4279
2018-07-24 05:12:00	9.55049
2018-07-24 05:24:00	11.0016
2018-07-24 05:36:00	11.8453
2018-07-24 05:48:00	9.85421
2018-07-24 06:00:00	10.6979
2018-07-24 06:12:00	11.2716
2018-07-24 06:24:00	8.84179
2018-07-24 06:36:00	12.554
2018-07-24 06:48:00	9.68548
2018-07-24 07:00:00	11.4066
2018-07-24 07:12:00	10.2592
2018-07-24 07:24:00	11.5416
2018-07-24 07:36:00	12.284
2018-07-24 07:48:00	13.8364
2018-07-24 08:00:00	9.28051
2018-07-24 08:12:00	12.9927
2018-07-24 08:24:00	13.5664
2018-07-24 08:36:00	11.1366
2018-07-24 08:48:00	11.8453
2018-07-24 09:00:00	11.4066
2018-07-24 09:12:00	11.1366
2018-07-24 09:24:00	11.2716
2018-07-24 09:36:00	9.55049
2018-07-24 09:48:00	10.6979
2018-07-24 10:00:00	11.1366
2018-07-24 10:12:00	10.2592
2018-07-24 10:24:00	11.1366
2018-07-24 10:36:00	5.70329
2018-07-24 10:48:00	9.14552
2018-07-24 11:00:00	8.7068
2018-07-24 11:12:00	8.57182
2018-07-24 11:24:00	7.15443
2018-07-24 11:36:00	5.43332
2018-07-24 11:48:00	6.14201
2018-07-24 12:00:00	5.12959
2018-07-24 12:12:00	1.99109
2018-07-24 12:24:00	3.84719
2018-07-24 12:36:00	1.99109
2018-07-24 12:48:00	1.2824
2018-07-24 13:00:00	2.29482
2018-07-24 13:12:00	0.843683
2018-07-24 13:24:00	1.72111
2018-07-24 13:36:00	1.58612
2018-07-24 13:48:00	2.69978
2018-07-24 14:00:00	0.303726
2018-07-24 14:12:00	4.4209
2018-07-24 14:24:00	3.1385
2018-07-24 14:36:00	0.134989
2018-07-24 14:48:00	0.573704
2018-07-24 15:00:00	2.42981
2018-07-24 15:12:00	0
2018-07-24 15:24:00	1.58612
2018-07-24 15:36:00	0
2018-07-24 15:48:00	0
2018-07-24 16:00:00	0
2018-07-24 16:12:00	0
2018-07-24 16:24:00	0
2018-07-24 16:36:00	0.269978
2018-07-24 16:48:00	0
2018-07-24 17:00:00	3.27349
2018-07-24 17:12:00	1.99109
2018-07-24 17:24:00	2.29482
2018-07-24 17:36:00	1.41739
2018-07-24 17:48:00	0
2018-07-24 18:00:00	0
2018-07-24 18:12:00	3.7122
2018-07-24 18:24:00	3.27349
2018-07-24 18:36:00	5.12959
2018-07-24 18:48:00	3.57721
2018-07-24 19:00:00	3.7122
2018-07-24 19:12:00	4.11717
2018-07-24 19:24:00	4.69088
2018-07-24 19:36:00	5.12959
2018-07-24 19:48:00	5.26458
2018-07-24 20:00:00	6.98569
2018-07-24 20:12:00	9.11177
2018-07-24 20:24:00	7.82937
2018-07-24 20:36:00	10.6979
2018-07-24 20:48:00	7.86312
2018-07-24 21:00:00	8.7068
2018-07-24 21:12:00	8.26809
2018-07-24 21:24:00	4.9946
2018-07-24 21:36:00	3.84719
2018-07-24 21:48:00	3.1385
2018-07-24 22:00:00	2.5648
2018-07-24 22:12:00	0
2018-07-24 22:24:00	2.5648
2018-07-24 22:36:00	4.55588
2018-07-24 22:48:00	6.277
2018-07-24 23:00:00	7.12068
2018-07-24 23:12:00	7.42441
2018-07-24 23:24:00	8.97678
2018-07-24 23:36:00	6.277
2018-07-24 23:48:00	8.40308
2018-07-25	9.4155
2018-07-25 00:12:00	9.11177
2018-07-25 00:24:00	8.97678
2018-07-25 00:36:00	8.26809
2018-07-25 00:48:00	11.2716
2018-07-25 01:00:00	8.7068
2018-07-25 01:12:00	10.4279
2018-07-25 01:24:00	8.84179
2018-07-25 01:36:00	9.85421
2018-07-25 01:48:00	6.71571
2018-07-25 02:00:00	7.5594
2018-07-25 02:12:00	6.00702
2018-07-25 02:24:00	6.71571
2018-07-25 02:36:00	7.12068
2018-07-25 02:48:00	7.99811
2018-07-25 03:00:00	7.5594
2018-07-25 03:12:00	7.99811
2018-07-25 03:24:00	8.84179
2018-07-25 03:36:00	6.277
2018-07-25 03:48:00	7.5594
2018-07-25 04:00:00	7.12068
2018-07-25 04:12:00	8.57182
2018-07-25 04:24:00	8.7068
2018-07-25 04:36:00	9.55049
2018-07-25 04:48:00	8.7068
2018-07-25 05:00:00	10.2592
2018-07-25 05:12:00	10.2592
2018-07-25 05:24:00	10.5629
2018-07-25 05:36:00	11.0016
2018-07-25 05:48:00	10.4279
2018-07-25 06:00:00	10.4279
2018-07-25 06:12:00	9.28051
2018-07-25 06:24:00	9.28051
2018-07-25 06:36:00	11.1366
2018-07-25 06:48:00	10.8329
2018-07-25 07:00:00	11.4066
2018-07-25 07:12:00	9.85421
2018-07-25 07:24:00	10.6979
2018-07-25 07:36:00	10.2929
2018-07-25 07:48:00	9.9892
2018-07-25 08:00:00	9.55049
2018-07-25 08:12:00	9.14552
2018-07-25 08:24:00	10.8329
2018-07-25 08:36:00	9.55049
2018-07-25 08:48:00	9.9892
2018-07-25 09:00:00	7.42441
2018-07-25 09:12:00	6.71571
2018-07-25 09:24:00	8.57182
2018-07-25 09:36:00	6.98569
2018-07-25 09:48:00	7.69438
2018-07-25 10:00:00	7.12068
2018-07-25 10:12:00	5.26458
2018-07-25 10:24:00	7.15443
2018-07-25 10:36:00	4.28591
2018-07-25 10:48:00	6.71571
2018-07-25 11:00:00	3.84719
2018-07-25 11:12:00	4.72462
2018-07-25 11:24:00	3.84719
2018-07-25 11:36:00	1.01242
2018-07-25 11:48:00	4.9946
2018-07-25 12:00:00	5.12959
2018-07-25 12:12:00	4.85961
2018-07-25 12:24:00	6.14201
2018-07-25 12:36:00	4.69088
2018-07-25 12:48:00	3.84719
2018-07-25 13:00:00	4.28591
2018-07-25 13:12:00	3.27349
2018-07-25 13:24:00	4.28591
2018-07-25 13:36:00	2.42981
2018-07-25 13:48:00	1.72111
2018-07-25 14:00:00	0
2018-07-25 14:12:00	2.12608
2018-07-25 14:24:00	0
2018-07-25 14:36:00	0.134989
2018-07-25 14:48:00	3.40848
2018-07-25 15:00:00	1.58612
2018-07-25 15:12:00	3.98218
2018-07-25 15:24:00	3.84719
2018-07-25 15:36:00	3.98218
2018-07-25 15:48:00	1.8561
2018-07-25 16:00:00	6.14201
2018-07-25 16:12:00	7.12068
2018-07-25 16:24:00	6.00702
2018-07-25 16:36:00	2.5648
2018-07-25 16:48:00	0.134989
2018-07-25 17:00:00	5.5683
2018-07-25 17:12:00	0
2018-07-25 17:24:00	0
2018-07-25 17:36:00	0
2018-07-25 17:48:00	0
2018-07-25 18:00:00	4.4209
2018-07-25 18:12:00	5.29833
2018-07-25 18:24:00	3.98218
2018-07-25 18:36:00	3.84719
2018-07-25 18:48:00	1.14741
2018-07-25 19:00:00	0
2018-07-25 19:12:00	0
2018-07-25 19:24:00	4.4209
2018-07-25 19:36:00	4.15092
2018-07-25 19:48:00	5.29833
2018-07-25 20:00:00	4.4209
2018-07-25 20:12:00	4.28591
2018-07-25 20:24:00	3.1385
2018-07-25 20:36:00	0.303726
2018-07-25 20:48:00	0.708693
2018-07-25 21:00:00	3.1385
2018-07-25 21:12:00	0.134989
2018-07-25 21:24:00	0
2018-07-25 21:36:00	3.27349
2018-07-25 21:48:00	3.98218
2018-07-25 22:00:00	5.5683
2018-07-25 22:12:00	6.8507
2018-07-25 22:24:00	6.00702
2018-07-25 22:36:00	6.71571
2018-07-25 22:48:00	7.69438
2018-07-25 23:00:00	8.26809
2018-07-25 23:12:00	10.8329
2018-07-25 23:24:00	11.9803
2018-07-25 23:36:00	9.55049
2018-07-25 23:48:00	10.2592
2018-07-26	10.1242
2018-07-26 00:12:00	9.55049
2018-07-26 00:24:00	10.5629
2018-07-26 00:36:00	9.9892
2018-07-26 00:48:00	9.9892
2018-07-26 01:00:00	9.85421
2018-07-26 01:12:00	10.6979
2018-07-26 01:24:00	10.4279
2018-07-26 01:36:00	10.4279
2018-07-26 01:48:00	10.6979
2018-07-26 02:00:00	9.14552
2018-07-26 02:12:00	14.1401
2018-07-26 02:24:00	11.4066
2018-07-26 02:36:00	10.9679
2018-07-26 02:48:00	12.9927
2018-07-26 03:00:00	10.2592
2018-07-26 03:12:00	10.4279
2018-07-26 03:24:00	7.99811
2018-07-26 03:36:00	9.14552
2018-07-26 03:48:00	11.1366
2018-07-26 04:00:00	10.1242
2018-07-26 04:12:00	9.9892
2018-07-26 04:24:00	9.55049
2018-07-26 04:36:00	10.1242
2018-07-26 04:48:00	11.0016
2018-07-26 05:00:00	11.0016
2018-07-26 05:12:00	10.2592
2018-07-26 05:24:00	11.1366
2018-07-26 05:36:00	9.14552
2018-07-26 05:48:00	11.7103
2018-07-26 06:00:00	10.5629
2018-07-26 06:12:00	8.40308
2018-07-26 06:24:00	10.5629
2018-07-26 06:36:00	10.2592
2018-07-26 06:48:00	9.14552
2018-07-26 07:00:00	8.97678
2018-07-26 07:12:00	9.4155
2018-07-26 07:24:00	8.26809
2018-07-26 07:36:00	8.7068
2018-07-26 07:48:00	8.97678
2018-07-26 08:00:00	9.28051
2018-07-26 08:12:00	8.43683
2018-07-26 08:24:00	9.4155
2018-07-26 08:36:00	8.57182
2018-07-26 08:48:00	10.4279
2018-07-26 09:00:00	6.41199
2018-07-26 09:12:00	7.5594
2018-07-26 09:24:00	7.42441
2018-07-26 09:36:00	4.9946
2018-07-26 09:48:00	6.71571
2018-07-26 10:00:00	5.43332
2018-07-26 10:12:00	5.12959
2018-07-26 10:24:00	4.28591
2018-07-26 10:36:00	6.71571
2018-07-26 10:48:00	2.5648
2018-07-26 11:00:00	4.9946
2018-07-26 11:12:00	6.00702
2018-07-26 11:24:00	1.72111
2018-07-26 11:36:00	3.1385
2018-07-26 11:48:00	4.69088
2018-07-26 12:00:00	3.27349
2018-07-26 12:12:00	2.12608
2018-07-26 12:24:00	4.4209
2018-07-26 12:36:00	0.438715
2018-07-26 12:48:00	3.98218
2018-07-26 13:00:00	4.4209
2018-07-26 13:12:00	2.83477
2018-07-26 13:24:00	1.72111
2018-07-26 13:36:00	4.55588
2018-07-26 13:48:00	1.2824
2018-07-26 14:00:00	2.29482
2018-07-26 14:12:00	2.5648
2018-07-26 14:24:00	3.98218
2018-07-26 14:36:00	1.58612
2018-07-26 14:48:00	2.69978
2018-07-26 15:00:00	3.7122
2018-07-26 15:12:00	7.5594
2018-07-26 15:24:00	7.12068
2018-07-26 15:36:00	7.42441
2018-07-26 15:48:00	7.5594
2018-07-26 16:00:00	9.55049
2018-07-26 16:12:00	8.84179
2018-07-26 16:24:00	9.55049
2018-07-26 16:36:00	8.7068
2018-07-26 16:48:00	9.28051
2018-07-26 17:00:00	7.28942
2018-07-26 17:12:00	7.82937
2018-07-26 17:24:00	6.98569
2018-07-26 17:36:00	5.43332
2018-07-26 17:48:00	3.57721
2018-07-26 18:00:00	5.70329
2018-07-26 18:12:00	6.00702
2018-07-26 18:24:00	2.69978
2018-07-26 18:36:00	0
2018-07-26 18:48:00	2.12608
2018-07-26 19:00:00	0
2018-07-26 19:12:00	0
2018-07-26 19:24:00	1.41739
2018-07-26 19:36:00	2.42981
2018-07-26 19:48:00	3.7122
2018-07-26 20:00:00	2.86852
2018-07-26 20:12:00	0
2018-07-26 20:24:00	3.57721
2018-07-26 20:36:00	3.1385
2018-07-26 20:48:00	4.55588
2018-07-26 21:00:00	4.15092
2018-07-26 21:12:00	4.28591
2018-07-26 21:24:00	3.40848
2018-07-26 21:36:00	2.29482
2018-07-26 21:48:00	0.87743
2018-07-26 22:00:00	0
2018-07-26 22:12:00	4.69088
2018-07-26 22:24:00	6.00702
2018-07-26 22:36:00	5.26458
2018-07-26 22:48:00	5.12959
2018-07-26 23:00:00	5.43332
2018-07-26 23:12:00	5.12959
2018-07-26 23:24:00	8.84179
2018-07-26 23:36:00	7.5594
2018-07-26 23:48:00	7.12068
2018-07-27	8.57182
2018-07-27 00:12:00	8.40308
2018-07-27 00:24:00	7.5594
2018-07-27 00:36:00	8.1331
2018-07-27 00:48:00	8.26809
2018-07-27 01:00:00	10.1242
2018-07-27 01:12:00	9.55049
2018-07-27 01:24:00	8.97678
2018-07-27 01:36:00	10.1242
2018-07-27 01:48:00	9.68548
2018-07-27 02:00:00	7.82937
2018-07-27 02:12:00	8.57182
2018-07-27 02:24:00	8.7068
2018-07-27 02:36:00	10.5629
2018-07-27 02:48:00	10.6979
2018-07-27 03:00:00	7.42441
2018-07-27 03:12:00	10.9679
2018-07-27 03:24:00	11.2716
2018-07-27 03:36:00	12.9927
2018-07-27 03:48:00	12.2503
2018-07-27 04:00:00	10.8666
2018-07-27 04:12:00	9.55049
2018-07-27 04:24:00	11.7103
2018-07-27 04:36:00	12.1153
2018-07-27 04:48:00	10.4279
2018-07-27 05:00:00	10.2929
2018-07-27 05:12:00	9.55049
2018-07-27 05:24:00	8.57182
2018-07-27 05:36:00	8.53807
2018-07-27 05:48:00	9.71922
2018-07-27 06:00:00	9.4155
2018-07-27 06:12:00	9.85421
2018-07-27 06:24:00	9.68548
2018-07-27 06:36:00	10.6979
2018-07-27 06:48:00	9.85421
2018-07-27 07:00:00	9.14552
2018-07-27 07:12:00	10.5629
2018-07-27 07:24:00	12.9927
2018-07-27 07:36:00	11.9803
2018-07-27 07:48:00	12.419
2018-07-27 08:00:00	11.7103
2018-07-27 08:12:00	11.7103
2018-07-27 08:24:00	11.7103
2018-07-27 08:36:00	10.5629
2018-07-27 08:48:00	9.4155
2018-07-27 09:00:00	10.5629
2018-07-27 09:12:00	8.26809
2018-07-27 09:24:00	8.26809
2018-07-27 09:36:00	9.55049
2018-07-27 09:48:00	8.57182
2018-07-27 10:00:00	7.5594
2018-07-27 10:12:00	4.9946
2018-07-27 10:24:00	3.84719
2018-07-27 10:36:00	2.86852
2018-07-27 10:48:00	6.41199
2018-07-27 11:00:00	3.57721
2018-07-27 11:12:00	4.9946
2018-07-27 11:24:00	3.84719
2018-07-27 11:36:00	3.44223
2018-07-27 11:48:00	4.9946
2018-07-27 12:00:00	5.83828
2018-07-27 12:12:00	4.15092
2018-07-27 12:24:00	9.28051
2018-07-27 12:36:00	7.25567
2018-07-27 12:48:00	4.9946
2018-07-27 13:00:00	2.69978
2018-07-27 13:12:00	4.69088
2018-07-27 13:24:00	1.99109
2018-07-27 13:36:00	2.42981
2018-07-27 13:48:00	0.87743
2018-07-27 14:00:00	3.1385
2018-07-27 14:12:00	2.83477
2018-07-27 14:24:00	1.99109
2018-07-27 14:36:00	0.708693
2018-07-27 14:48:00	6.71571
2018-07-27 15:00:00	4.4209
2018-07-27 15:12:00	1.2824
2018-07-27 15:24:00	3.1385
2018-07-27 15:36:00	0
2018-07-27 15:48:00	4.9946
2018-07-27 16:00:00	10.1242
2018-07-27 16:12:00	5.29833
2018-07-27 16:24:00	3.98218
2018-07-27 16:36:00	0
2018-07-27 16:48:00	1.41739
2018-07-27 17:00:00	2.5648
2018-07-27 17:12:00	0.708693
2018-07-27 17:24:00	1.14741
2018-07-27 17:36:00	1.72111
2018-07-27 17:48:00	2.5648
2018-07-27 18:00:00	4.9946
2018-07-27 18:12:00	5.87203
2018-07-27 18:24:00	5.87203
2018-07-27 18:36:00	6.54698
2018-07-27 18:48:00	4.9946
2018-07-27 19:00:00	6.41199
2018-07-27 19:12:00	2.12608
2018-07-27 19:24:00	1.01242
2018-07-27 19:36:00	0
2018-07-27 19:48:00	0
2018-07-27 20:00:00	0
2018-07-27 20:12:00	7.42441
2018-07-27 20:24:00	3.27349
2018-07-27 20:36:00	2.29482
2018-07-27 20:48:00	2.83477
2018-07-27 21:00:00	2.69978
2018-07-27 21:12:00	6.00702
2018-07-27 21:24:00	4.15092
2018-07-27 21:36:00	4.28591
2018-07-27 21:48:00	5.70329
2018-07-27 22:00:00	5.5683
2018-07-27 22:12:00	0
2018-07-27 22:24:00	0
2018-07-27 22:36:00	2.69978
2018-07-27 22:48:00	3.27349
2018-07-27 23:00:00	3.27349
2018-07-27 23:12:00	2.86852
2018-07-27 23:24:00	3.1385
2018-07-27 23:36:00	3.7122
2018-07-27 23:48:00	4.11717
2018-07-28	4.9946
2018-07-28 00:12:00	6.277
2018-07-28 00:24:00	6.98569
2018-07-28 00:36:00	9.4155
2018-07-28 00:48:00	10.1242
2018-07-28 01:00:00	11.4066
2018-07-28 01:12:00	8.97678
2018-07-28 01:24:00	9.9892
2018-07-28 01:36:00	10.8329
2018-07-28 01:48:00	10.5629
2018-07-28 02:00:00	7.82937
2018-07-28 02:12:00	8.84179
2018-07-28 02:24:00	10.1242
2018-07-28 02:36:00	10.2592
2018-07-28 02:48:00	9.85421
2018-07-28 03:00:00	9.71922
2018-07-28 03:12:00	8.84179
2018-07-28 03:24:00	8.26809
2018-07-28 03:36:00	9.4155
2018-07-28 03:48:00	8.26809
2018-07-28 04:00:00	8.26809
2018-07-28 04:12:00	9.28051
2018-07-28 04:24:00	9.4155
2018-07-28 04:36:00	9.9892
2018-07-28 04:48:00	11.2716
2018-07-28 05:00:00	11.2716
2018-07-28 05:12:00	8.57182
2018-07-28 05:24:00	9.55049
2018-07-28 05:36:00	9.68548
2018-07-28 05:48:00	9.9892
2018-07-28 06:00:00	10.2592
2018-07-28 06:12:00	9.4155
2018-07-28 06:24:00	8.53807
2018-07-28 06:36:00	9.4155
2018-07-28 06:48:00	9.9892
2018-07-28 07:00:00	10.2592
2018-07-28 07:12:00	11.4066
2018-07-28 07:24:00	10.5629
2018-07-28 07:36:00	9.55049
2018-07-28 07:48:00	10.6979
2018-07-28 08:00:00	12.284
2018-07-28 08:12:00	11.5753
2018-07-28 08:24:00	11.4066
2018-07-28 08:36:00	9.85421
2018-07-28 08:48:00	11.0016
2018-07-28 09:00:00	6.98569
2018-07-28 09:12:00	11.1366
2018-07-28 09:24:00	8.7068
2018-07-28 09:36:00	7.28942
2018-07-28 09:48:00	7.5594
2018-07-28 10:00:00	5.87203
2018-07-28 10:12:00	3.84719
2018-07-28 10:24:00	4.4209
2018-07-28 10:36:00	4.4209
2018-07-28 10:48:00	2.69978
2018-07-28 11:00:00	1.99109
2018-07-28 11:12:00	2.42981
2018-07-28 11:24:00	3.00351
2018-07-28 11:36:00	3.1385
2018-07-28 11:48:00	4.55588
2018-07-28 12:00:00	4.11717
2018-07-28 12:12:00	3.7122
2018-07-28 12:24:00	3.84719
2018-07-28 12:36:00	3.1385
2018-07-28 12:48:00	4.15092
2018-07-28 13:00:00	6.00702
2018-07-28 13:12:00	3.27349
2018-07-28 13:24:00	5.70329
2018-07-28 13:36:00	6.277
2018-07-28 13:48:00	6.8507
2018-07-28 14:00:00	6.41199
2018-07-28 14:12:00	6.14201
2018-07-28 14:24:00	7.5594
2018-07-28 14:36:00	6.14201
2018-07-28 14:48:00	5.12959
2018-07-28 15:00:00	10.1242
2018-07-28 15:12:00	12.1153
2018-07-28 15:24:00	5.70329
2018-07-28 15:36:00	4.28591
2018-07-28 15:48:00	4.9946
2018-07-28 16:00:00	7.28942
2018-07-28 16:12:00	3.98218
2018-07-28 16:24:00	5.12959
2018-07-28 16:36:00	2.5648
2018-07-28 16:48:00	0.303726
2018-07-28 17:00:00	1.8561
2018-07-28 17:12:00	1.41739
2018-07-28 17:24:00	2.5648
2018-07-28 17:36:00	8.84179
2018-07-28 17:48:00	8.7068
2018-07-28 18:00:00	7.28942
2018-07-28 18:12:00	6.58072
2018-07-28 18:24:00	10.2592
2018-07-28 18:36:00	7.99811
2018-07-28 18:48:00	9.9892
2018-07-28 19:00:00	10.2929
2018-07-28 19:12:00	9.68548
2018-07-28 19:24:00	11.2716
2018-07-28 19:36:00	10.5629
2018-07-28 19:48:00	7.15443
2018-07-28 20:00:00	6.98569
2018-07-28 20:12:00	7.28942
2018-07-28 20:24:00	10.2592
2018-07-28 20:36:00	7.69438
2018-07-28 20:48:00	7.86312
2018-07-28 21:00:00	10.1242
2018-07-28 21:12:00	9.11177
2018-07-28 21:24:00	9.11177
2018-07-28 21:36:00	7.99811
2018-07-28 21:48:00	8.1331
2018-07-28 22:00:00	7.99811
2018-07-28 22:12:00	8.97678
2018-07-28 22:24:00	7.28942
2018-07-28 22:36:00	8.40308
2018-07-28 22:48:00	8.57182
2018-07-28 23:00:00	7.5594
2018-07-28 23:12:00	7.12068
2018-07-28 23:24:00	2.69978
2018-07-28 23:36:00	2.69978
2018-07-28 23:48:00	3.1385
2018-07-29	3.27349
2018-07-29 00:12:00	0.438715
2018-07-29 00:24:00	3.27349
2018-07-29 00:36:00	2.86852
2018-07-29 00:48:00	4.85961
2018-07-29 01:00:00	5.29833
2018-07-29 01:12:00	3.84719
2018-07-29 01:24:00	1.8561
2018-07-29 01:36:00	2.42981
2018-07-29 01:48:00	3.00351
2018-07-29 02:00:00	3.40848
2018-07-29 02:12:00	3.1385
2018-07-29 02:24:00	0.573704
2018-07-29 02:36:00	1.8561
2018-07-29 02:48:00	3.84719
2018-07-29 03:00:00	5.43332
2018-07-29 03:12:00	5.43332
2018-07-29 03:24:00	5.70329
2018-07-29 03:36:00	6.71571
2018-07-29 03:48:00	8.26809
2018-07-29 04:00:00	6.41199
2018-07-29 04:12:00	9.55049
2018-07-29 04:24:00	9.28051
2018-07-29 04:36:00	7.69438
2018-07-29 04:48:00	6.58072
2018-07-29 05:00:00	5.70329
2018-07-29 05:12:00	7.42441
2018-07-29 05:24:00	5.70329
2018-07-29 05:36:00	7.42441
2018-07-29 05:48:00	6.41199
2018-07-29 06:00:00	6.58072
2018-07-29 06:12:00	7.69438
2018-07-29 06:24:00	6.98569
2018-07-29 06:36:00	6.54698
2018-07-29 06:48:00	7.69438
2018-07-29 07:00:00	7.42441
2018-07-29 07:12:00	8.40308
2018-07-29 07:24:00	8.26809
2018-07-29 07:36:00	7.99811
2018-07-29 07:48:00	9.11177
2018-07-29 08:00:00	8.57182
2018-07-29 08:12:00	7.12068
2018-07-29 08:24:00	6.277
2018-07-29 08:36:00	7.28942
2018-07-29 08:48:00	5.43332
2018-07-29 09:00:00	3.98218
2018-07-29 09:12:00	4.72462
2018-07-29 09:24:00	3.7122
2018-07-29 09:36:00	2.5648
2018-07-29 09:48:00	4.69088
2018-07-29 10:00:00	0.134989
2018-07-29 10:12:00	1.01242
2018-07-29 10:24:00	3.7122
2018-07-29 10:36:00	0.843683
2018-07-29 10:48:00	5.26458
2018-07-29 11:00:00	4.85961
2018-07-29 11:12:00	3.57721
2018-07-29 11:24:00	0.438715
2018-07-29 11:36:00	6.58072
2018-07-29 11:48:00	2.5648
2018-07-29 12:00:00	3.84719
2018-07-29 12:12:00	3.84719
2018-07-29 12:24:00	2.12608
2018-07-29 12:36:00	1.2824
2018-07-29 12:48:00	4.85961
2018-07-29 13:00:00	3.27349
2018-07-29 13:12:00	3.1385
2018-07-29 13:24:00	3.00351
2018-07-29 13:36:00	3.44223
2018-07-29 13:48:00	2.86852
2018-07-29 14:00:00	6.98569
2018-07-29 14:12:00	2.69978
2018-07-29 14:24:00	0
2018-07-29 14:36:00	6.41199
2018-07-29 14:48:00	3.84719
2018-07-29 15:00:00	0
2018-07-29 15:12:00	5.70329
2018-07-29 15:24:00	3.27349
2018-07-29 15:36:00	2.73353
2018-07-29 15:48:00	3.98218
2018-07-29 16:00:00	2.29482
2018-07-29 16:12:00	3.00351
2018-07-29 16:24:00	1.99109
2018-07-29 16:36:00	0.87743
2018-07-29 16:48:00	2.5648
2018-07-29 17:00:00	1.72111
2018-07-29 17:12:00	1.8561
2018-07-29 17:24:00	3.98218
2018-07-29 17:36:00	2.15983
2018-07-29 17:48:00	0.708693
2018-07-29 18:00:00	0
2018-07-29 18:12:00	0
2018-07-29 18:24:00	1.14741
2018-07-29 18:36:00	1.58612
2018-07-29 18:48:00	3.98218
2018-07-29 19:00:00	3.00351
2018-07-29 19:12:00	0.134989
2018-07-29 19:24:00	0
2018-07-29 19:36:00	0
2018-07-29 19:48:00	0
2018-07-29 20:00:00	0
2018-07-29 20:12:00	0
2018-07-29 20:24:00	0
2018-07-29 20:36:00	5.70329
2018-07-29 20:48:00	5.5683
2018-07-29 21:00:00	6.277
2018-07-29 21:12:00	4.4209
2018-07-29 21:24:00	6.277
2018-07-29 21:36:00	5.12959
2018-07-29 21:48:00	7.99811
2018-07-29 22:00:00	6.41199
2018-07-29 22:12:00	7.12068
2018-07-29 22:24:00	7.12068
2018-07-29 22:36:00	8.84179
2018-07-29 22:48:00	7.69438
2018-07-29 23:00:00	8.1331
2018-07-29 23:12:00	8.7068
2018-07-29 23:24:00	7.86312
2018-07-29 23:36:00	8.84179
2018-07-29 23:48:00	9.28051
2018-07-30	8.26809
2018-07-30 00:12:00	7.5594
2018-07-30 00:24:00	7.99811
2018-07-30 00:36:00	7.42441
2018-07-30 00:48:00	8.40308
2018-07-30 01:00:00	7.69438
2018-07-30 01:12:00	8.40308
2018-07-30 01:24:00	6.8507
2018-07-30 01:36:00	6.8507
2018-07-30 01:48:00	7.5594
2018-07-30 02:00:00	5.70329
2018-07-30 02:12:00	6.277
2018-07-30 02:24:00	6.71571
2018-07-30 02:36:00	7.82937
2018-07-30 02:48:00	7.28942
2018-07-30 03:00:00	6.8507
2018-07-30 03:12:00	7.99811
2018-07-30 03:24:00	7.82937
2018-07-30 03:36:00	7.86312
2018-07-30 03:48:00	8.26809
2018-07-30 04:00:00	8.97678
2018-07-30 04:12:00	8.84179
2018-07-30 04:24:00	8.97678
2018-07-30 04:36:00	8.40308
2018-07-30 04:48:00	6.44573
2018-07-30 05:00:00	6.277
2018-07-30 05:12:00	7.15443
2018-07-30 05:24:00	6.58072
2018-07-30 05:36:00	6.14201
2018-07-30 05:48:00	8.57182
2018-07-30 06:00:00	7.42441
2018-07-30 06:12:00	6.58072
2018-07-30 06:24:00	7.5594
2018-07-30 06:36:00	6.8507
2018-07-30 06:48:00	6.00702
2018-07-30 07:00:00	6.71571
2018-07-30 07:12:00	7.12068
2018-07-30 07:24:00	6.71571
2018-07-30 07:36:00	9.71922
2018-07-30 07:48:00	6.98569
2018-07-30 08:00:00	6.277
2018-07-30 08:12:00	7.28942
2018-07-30 08:24:00	6.98569
2018-07-30 08:36:00	6.41199
2018-07-30 08:48:00	6.71571
2018-07-30 09:00:00	6.58072
2018-07-30 09:12:00	3.98218
2018-07-30 09:24:00	3.84719
2018-07-30 09:36:00	2.42981
2018-07-30 09:48:00	6.00702
2018-07-30 10:00:00	5.12959
2018-07-30 10:12:00	7.69438
2018-07-30 10:24:00	4.15092
2018-07-30 10:36:00	6.98569
2018-07-30 10:48:00	8.57182
2018-07-30 11:00:00	2.69978
2018-07-30 11:12:00	5.5683
2018-07-30 11:24:00	1.99109
2018-07-30 11:36:00	1.41739
2018-07-30 11:48:00	3.84719
2018-07-30 12:00:00	6.71571
2018-07-30 12:12:00	7.69438
2018-07-30 12:24:00	8.26809
2018-07-30 12:36:00	7.42441
2018-07-30 12:48:00	6.277
2018-07-30 13:00:00	8.1331
2018-07-30 13:12:00	4.4209
2018-07-30 13:24:00	5.39957
2018-07-30 13:36:00	6.41199
2018-07-30 13:48:00	1.8561
2018-07-30 14:00:00	5.83828
2018-07-30 14:12:00	2.69978
2018-07-30 14:24:00	2.5648
2018-07-30 14:36:00	2.5648
2018-07-30 14:48:00	2.69978
2018-07-30 15:00:00	2.29482
2018-07-30 15:12:00	1.41739
2018-07-30 15:24:00	5.43332
2018-07-30 15:36:00	0.303726
2018-07-30 15:48:00	3.00351
2018-07-30 16:00:00	3.1385
2018-07-30 16:12:00	1.72111
2018-07-30 16:24:00	4.11717
2018-07-30 16:36:00	2.69978
2018-07-30 16:48:00	2.29482
2018-07-30 17:00:00	1.01242
2018-07-30 17:12:00	1.72111
2018-07-30 17:24:00	2.86852
2018-07-30 17:36:00	2.5648
2018-07-30 17:48:00	0.573704
2018-07-30 18:00:00	1.41739
2018-07-30 18:12:00	4.69088
2018-07-30 18:24:00	6.71571
2018-07-30 18:36:00	5.5683
2018-07-30 18:48:00	4.85961
2018-07-30 19:00:00	3.7122
2018-07-30 19:12:00	4.11717
2018-07-30 19:24:00	2.86852
2018-07-30 19:36:00	5.43332
2018-07-30 19:48:00	3.7122
2018-07-30 20:00:00	1.2824
2018-07-30 20:12:00	1.2824
2018-07-30 20:24:00	0.438715
2018-07-30 20:36:00	2.69978
2018-07-30 20:48:00	3.84719
2018-07-30 21:00:00	5.83828
2018-07-30 21:12:00	7.15443
2018-07-30 21:24:00	6.00702
2018-07-30 21:36:00	6.41199
2018-07-30 21:48:00	7.69438
2018-07-30 22:00:00	6.98569
2018-07-30 22:12:00	5.5683
2018-07-30 22:24:00	7.12068
2018-07-30 22:36:00	6.00702
2018-07-30 22:48:00	6.14201
2018-07-30 23:00:00	6.00702
2018-07-30 23:12:00	6.14201
2018-07-30 23:24:00	6.8507
2018-07-30 23:36:00	6.14201
2018-07-30 23:48:00	6.71571
2018-07-31	5.70329
2018-07-31 00:12:00	6.71571
2018-07-31 00:24:00	6.00702
2018-07-31 00:36:00	6.14201
2018-07-31 00:48:00	5.97327
2018-07-31 01:00:00	7.42441
2018-07-31 01:12:00	7.5594
2018-07-31 01:24:00	7.5594
2018-07-31 01:36:00	6.58072
2018-07-31 01:48:00	8.57182
2018-07-31 02:00:00	6.14201
2018-07-31 02:12:00	6.14201
2018-07-31 02:24:00	7.86312
2018-07-31 02:36:00	8.26809
2018-07-31 02:48:00	9.11177
2018-07-31 03:00:00	9.28051
2018-07-31 03:12:00	8.97678
2018-07-31 03:24:00	10.4279
2018-07-31 03:36:00	9.55049
2018-07-31 03:48:00	8.97678
2018-07-31 04:00:00	9.71922
2018-07-31 04:12:00	9.28051
2018-07-31 04:24:00	8.97678
2018-07-31 04:36:00	8.97678
2018-07-31 04:48:00	7.12068
2018-07-31 05:00:00	9.11177
2018-07-31 05:12:00	8.40308
2018-07-31 05:24:00	7.42441
2018-07-31 05:36:00	6.71571
2018-07-31 05:48:00	8.1331
2018-07-31 06:00:00	8.57182
2018-07-31 06:12:00	7.5594
2018-07-31 06:24:00	6.14201
2018-07-31 06:36:00	7.12068
2018-07-31 06:48:00	6.58072
2018-07-31 07:00:00	7.28942
2018-07-31 07:12:00	7.42441
2018-07-31 07:24:00	6.00702
2018-07-31 07:36:00	5.43332
2018-07-31 07:48:00	6.71571
2018-07-31 08:00:00	7.42441
2018-07-31 08:12:00	6.98569
2018-07-31 08:24:00	8.1331
2018-07-31 08:36:00	6.00702
2018-07-31 08:48:00	5.29833
2018-07-31 09:00:00	5.70329
2018-07-31 09:12:00	3.00351
2018-07-31 09:24:00	4.85961
2018-07-31 09:36:00	2.12608
2018-07-31 09:48:00	2.15983
2018-07-31 10:00:00	2.42981
2018-07-31 10:12:00	3.27349
2018-07-31 10:24:00	0.573704
2018-07-30 10:36:00	6.44573
2018-07-30 10:48:00	6.07451
2018-07-30 11:00:00	8.20059
2018-07-30 11:12:00	5.60205
2018-07-30 11:24:00	5.33207
2018-07-30 11:36:00	2.73353
2018-07-30 11:48:00	3.10475
2018-07-30 12:00:00	5.33207
2018-07-30 12:12:00	7.08693
2018-07-30 12:24:00	6.81696
2018-07-30 12:36:00	9.44924
2018-07-30 12:48:00	5.97327
2018-07-30 13:00:00	7.69438
2018-07-30 13:12:00	5.83828
2018-07-30 13:24:00	5.83828
2018-07-30 13:36:00	5.23083
2018-07-30 13:48:00	4.58963
2018-07-30 14:00:00	5.46706
2018-07-30 14:12:00	5.46706
2018-07-30 14:24:00	5.23083
2018-07-30 14:36:00	3.84719
2018-07-30 14:48:00	3.61096
2018-07-30 15:00:00	2.86852
2018-07-30 15:12:00	5.46706
2018-07-30 15:24:00	3.23974
2018-07-30 15:36:00	3.23974
2018-07-30 15:48:00	3.34098
2018-07-30 16:00:00	2.73353
2018-07-30 16:12:00	3.47597
2018-07-30 16:24:00	6.07451
2018-07-30 16:36:00	3.47597
2018-07-30 16:48:00	3.7122
2018-07-30 17:00:00	3.7122
2018-07-30 17:12:00	3.61096
2018-07-30 17:24:00	2.22732
2018-07-30 17:36:00	2.4973
2018-07-30 17:48:00	3.98218
2018-07-30 18:00:00	0.236231
2018-07-30 18:12:00	4.72462
2018-07-30 18:24:00	6.81696
2018-07-30 18:36:00	6.34449
2018-07-30 18:48:00	6.2095
2018-07-30 19:00:00	3.84719
2018-07-30 19:12:00	3.7122
2018-07-30 19:24:00	4.3534
2018-07-30 19:36:00	5.83828
2018-07-30 19:48:00	4.3534
2018-07-30 20:00:00	1.8561
2018-07-30 20:12:00	1.48488
2018-07-30 20:24:00	3.34098
2018-07-30 20:36:00	3.10475
2018-07-30 20:48:00	3.98218
2018-07-30 21:00:00	9.17927
2018-07-30 21:12:00	7.82937
2018-07-30 21:24:00	7.5594
2018-07-30 21:36:00	6.58072
2018-07-30 21:48:00	8.67306
2018-07-30 22:00:00	8.7068
2018-07-30 22:12:00	5.83828
2018-07-30 22:24:00	7.69438
2018-07-30 22:36:00	5.60205
2018-07-30 22:48:00	6.81696
2018-07-30 23:00:00	6.34449
2018-07-30 23:12:00	6.71571
2018-07-30 23:24:00	6.44573
2018-07-30 23:36:00	6.44573
2018-07-30 23:48:00	7.59314
2018-07-31	6.2095
2018-07-31 00:12:00	6.58072
2018-07-31 00:24:00	5.97327
2018-07-31 00:36:00	6.44573
2018-07-31 00:48:00	5.83828
2018-07-31 01:00:00	7.82937
2018-07-31 01:12:00	8.94303
2018-07-31 01:24:00	8.43683
2018-07-31 01:36:00	7.82937
2018-07-31 01:48:00	8.0656
2018-07-31 02:00:00	7.32316
2018-07-31 02:12:00	6.81696
2018-07-31 02:24:00	7.45815
2018-07-31 02:36:00	8.80804
2018-07-31 02:48:00	7.69438
2018-07-31 03:00:00	9.07802
2018-07-31 03:12:00	10.6641
2018-07-31 03:24:00	10.2929
2018-07-31 03:36:00	9.92171
2018-07-31 03:48:00	10.7991
2018-07-31 04:00:00	9.55049
2018-07-31 04:12:00	10.4279
2018-07-31 04:24:00	9.07802
2018-07-31 04:36:00	8.57182
2018-07-31 04:48:00	6.2095
2018-07-31 05:00:00	8.94303
2018-07-31 05:12:00	10.6641
2018-07-31 05:24:00	7.45815
2018-07-31 05:36:00	7.08693
2018-07-31 05:48:00	8.33558
2018-07-31 06:00:00	8.94303
2018-07-31 06:12:00	7.45815
2018-07-31 06:24:00	6.58072
2018-07-31 06:36:00	8.0656
2018-07-31 06:48:00	7.08693
2018-07-31 07:00:00	8.7068
2018-07-31 07:12:00	7.96436
2018-07-31 07:24:00	5.70329
2018-07-31 07:36:00	5.46706
2018-07-31 07:48:00	7.18818
2018-07-31 08:00:00	5.83828
2018-07-31 08:12:00	6.58072
2018-07-31 08:24:00	6.2095
2018-07-31 08:36:00	7.08693
2018-07-31 08:48:00	6.34449
2018-07-31 09:00:00	5.33207
2018-07-31 09:12:00	4.58963
2018-07-31 09:24:00	4.48839
2018-07-31 09:36:00	2.59854
2018-07-31 09:48:00	4.11717
2018-07-31 10:00:00	2.22732
2018-07-31 10:12:00	3.23974
2018-07-31 10:24:00	1.48488
