# Supplementary material for: Determination of the Surface Roughness Parameter and Wind Shear Exponent of Kisii Region from the On-Site Measurement of Wind Profiles
Source: Hindawi journal article supplement (doi:10.1155/2019/8264061), 2019-07-01
Supplement: f1 [file 8264061.f1.zip › 8264061.f1/Nyamecheo A .xlsx]

## Sheet: Sheet1
2018-07-30	2.69978
2018-07-30 00:12:00	0		0	0.796436
2018-07-30 00:24:00	1.2824		1	0.654698
2018-07-30 00:36:00	0		2	0.283477
2018-07-30 00:48:00	0		3	0.971922
2018-07-30 01:00:00	2.12608		4	0
2018-07-30 01:12:00	0		5	0
2018-07-30 01:24:00	0.438715		6	0
2018-07-30 01:36:00	0.708693		7	0
2018-07-30 01:48:00	0		8	0
2018-07-30 02:00:00	0		9	2.93602
2018-07-30 02:12:00	0		10	3.51647
2018-07-30 02:24:00	0		11	4.91361
2018-07-30 02:36:00	1.41739		12	3.40173
2018-07-30 02:48:00	0		13	4.10367
2018-07-30 03:00:00	0.134989		14	3.82019
2018-07-30 03:12:00	2.29482		15	4.22516
2018-07-30 03:24:00	2.12608		16	5.13634
2018-07-30 03:36:00	0.303726		17	4.3669
2018-07-30 03:48:00	0		18	1.62662
2018-07-30 04:00:00	0		19	1.99109
2018-07-30 04:12:00	0		20	#DIV/0!
2018-07-30 04:24:00	0		21	#DIV/0!
2018-07-30 04:36:00	0		22	#DIV/0!
2018-07-30 04:48:00	0		23	#DIV/0!
2018-07-30 05:00:00	0
2018-07-30 05:12:00	0
2018-07-30 05:24:00	0
2018-07-30 05:36:00	0
2018-07-30 05:48:00	0
2018-07-30 06:00:00	0
2018-07-30 06:12:00	0
2018-07-30 06:24:00	0
2018-07-30 06:36:00	0
2018-07-30 06:48:00	0
2018-07-30 07:00:00	0
2018-07-30 07:12:00	0
2018-07-30 07:24:00	0
2018-07-30 07:36:00	0
2018-07-30 07:48:00	0
2018-07-30 08:00:00	0
2018-07-30 08:12:00	0
2018-07-30 08:24:00	0
2018-07-30 08:36:00	0
2018-07-30 08:48:00	0
2018-07-30 09:00:00	1.8561
2018-07-30 09:12:00	4.15092
2018-07-30 09:24:00	3.84719
2018-07-30 09:36:00	3.40848
2018-07-30 09:48:00	1.41739
2018-07-30 10:00:00	2.86852
2018-07-30 10:12:00	3.7122
2018-07-30 10:24:00	3.57721
2018-07-30 10:36:00	2.29482
2018-07-30 10:48:00	5.12959
2018-07-30 11:00:00	5.43332
2018-07-30 11:12:00	2.86852
2018-07-30 11:24:00	4.15092
2018-07-30 11:36:00	6.14201
2018-07-30 11:48:00	5.97327
2018-07-30 12:00:00	4.72462
2018-07-30 12:12:00	2.42981
2018-07-30 12:24:00	2.42981
2018-07-30 12:36:00	3.98218
2018-07-30 12:48:00	3.44223
2018-07-30 13:00:00	3.00351
2018-07-30 13:12:00	5.26458
2018-07-30 13:24:00	3.44223
2018-07-30 13:36:00	4.69088
2018-07-30 13:48:00	4.11717
2018-07-30 14:00:00	6.00702
2018-07-30 14:12:00	3.40848
2018-07-30 14:24:00	1.99109
2018-07-30 14:36:00	4.4209
2018-07-30 14:48:00	3.27349
2018-07-30 15:00:00	3.84719
2018-07-30 15:12:00	6.71571
2018-07-30 15:24:00	1.55238
2018-07-30 15:36:00	5.29833
2018-07-30 15:48:00	3.7122
2018-07-30 16:00:00	7.28942
2018-07-30 16:12:00	5.12959
2018-07-30 16:24:00	4.28591
2018-07-30 16:36:00	4.28591
2018-07-30 16:48:00	4.69088
2018-07-30 17:00:00	3.57721
2018-07-30 17:12:00	4.9946
2018-07-30 17:24:00	4.69088
2018-07-30 17:36:00	5.5683
2018-07-30 17:48:00	3.00351
2018-07-30 18:00:00	1.99109
2018-07-30 18:12:00	1.8561
2018-07-30 18:24:00	3.27349
2018-07-30 18:36:00	0.134989
2018-07-30 18:48:00	0.87743
2018-07-30 19:00:00	1.99109
2018-07-03	1.14741
2018-07-03 00:12:00	0.843683
2018-07-03 00:24:00	2.69978
2018-07-03 00:36:00	1.99109
2018-07-03 00:48:00	3.1385
2018-07-03 01:00:00	2.29482
2018-07-03 01:12:00	0
2018-07-03 01:24:00	1.2824
2018-07-03 01:36:00	0.438715
2018-07-03 01:48:00	0.573704
2018-07-03 02:00:00	0
2018-07-03 02:12:00	1.8561
2018-07-03 02:24:00	1.14741
2018-07-03 02:36:00	0
2018-07-03 02:48:00	2.29482
2018-07-03 03:00:00	2.29482
2018-07-03 03:12:00	1.41739
2018-07-03 03:24:00	0.303726
2018-07-03 03:36:00	0.573704
2018-07-03 03:48:00	0.269978
2018-07-03 04:00:00	0
2018-07-03 04:12:00	0.708693
2018-07-03 04:24:00	0
2018-07-03 04:36:00	0.303726
2018-07-03 04:48:00	0
2018-07-03 05:00:00	0.708693
2018-07-03 05:12:00	0
2018-07-03 05:24:00	0
2018-07-03 05:36:00	1.58612
2018-07-03 05:48:00	3.57721
2018-07-03 06:00:00	4.11717
2018-07-03 06:12:00	3.7122
2018-07-03 06:24:00	4.15092
2018-07-03 06:36:00	3.98218
2018-07-03 06:48:00	2.69978
2018-07-03 07:00:00	3.7122
2018-07-03 07:12:00	3.7122
2018-07-03 07:24:00	3.1385
2018-07-03 07:36:00	3.84719
2018-07-03 07:48:00	3.27349
2018-07-03 08:00:00	6.14201
2018-07-03 08:12:00	4.69088
2018-07-03 08:24:00	2.12608
2018-07-03 08:36:00	3.1385
2018-07-03 08:48:00	3.00351
2018-07-03 09:00:00	3.84719
2018-07-03 09:12:00	3.57721
2018-07-03 09:24:00	3.00351
2018-07-03 09:36:00	4.9946
2018-07-03 09:48:00	5.29833
2018-07-03 10:00:00	4.9946
2018-07-03 10:12:00	4.9946
2018-07-03 10:24:00	3.98218
2018-07-03 10:36:00	3.00351
2018-07-03 10:48:00	3.98218
2018-07-03 11:00:00	3.54347
2018-07-03 11:12:00	3.27349
2018-07-03 11:24:00	3.27349
2018-07-03 11:36:00	3.1385
2018-07-03 11:48:00	2.69978
2018-07-03 12:00:00	0.708693
2018-07-03 12:12:00	0
2018-07-03 12:24:00	0
2018-07-03 12:36:00	1.72111
2018-07-03 12:48:00	3.1385
2018-07-03 13:00:00	3.98218
2018-07-03 13:12:00	1.72111
2018-07-03 13:24:00	3.84719
2018-07-03 13:36:00	4.11717
2018-07-03 13:48:00	1.72111
2018-07-03 14:00:00	2.12608
2018-07-03 14:12:00	1.8561
2018-07-03 14:24:00	8.1331
2018-07-03 14:36:00	1.41739
2018-07-03 14:48:00	0
2018-07-03 15:00:00	1.58612
2018-07-03 15:12:00	1.2824
2018-07-03 15:24:00	2.29482
2018-07-03 15:36:00	0
2018-07-03 15:48:00	2.12608
2018-07-03 16:00:00	0.134989
2018-07-03 16:12:00	2.12608
2018-07-03 16:24:00	1.58612
2018-07-03 16:36:00	0
2018-07-03 16:48:00	0
2018-07-03 17:00:00	0.134989
2018-07-03 17:12:00	1.58612
2018-07-03 17:24:00	3.27349
2018-07-03 17:36:00	5.26458
2018-07-03 17:48:00	8.97678
2018-07-03 18:00:00	7.42441
2018-07-03 18:12:00	6.00702
2018-07-03 18:24:00	2.69978
2018-07-03 18:36:00	4.28591
2018-07-03 18:48:00	3.00351
2018-07-03 19:00:00	2.69978
2018-07-03 19:12:00	3.57721
2018-07-03 19:24:00	1.58612
2018-07-03 19:36:00	3.57721
2018-07-03 19:48:00	1.99109
2018-07-03 20:00:00	3.7122
2018-07-03 20:12:00	2.29482
2018-07-03 20:24:00	3.7122
2018-07-03 20:36:00	2.86852
2018-07-03 20:48:00	4.9946
2018-07-03 21:00:00	7.42441
2018-07-03 21:12:00	4.4209
2018-07-03 21:24:00	2.12608
2018-07-03 21:36:00	1.99109
2018-07-03 21:48:00	0.573704
2018-07-03 22:00:00	4.85961
2018-07-03 22:12:00	4.9946
2018-07-03 22:24:00	5.70329
2018-07-03 22:36:00	4.69088
2018-07-03 22:48:00	3.27349
2018-07-03 23:00:00	2.69978
2018-07-03 23:12:00	2.69978
2018-07-03 23:24:00	2.42981
2018-07-03 23:36:00	2.5648
2018-07-03 23:48:00	0.87743
2018-07-04	1.58612
2018-07-04 00:12:00	2.86852
2018-07-04 00:24:00	4.15092
2018-07-04 00:36:00	6.71571
2018-07-04 00:48:00	4.11717
2018-07-04 01:00:00	5.43332
2018-07-04 01:12:00	4.28591
2018-07-04 01:24:00	5.87203
2018-07-04 01:36:00	5.5683
2018-07-04 01:48:00	3.40848
2018-07-04 02:00:00	3.40848
2018-07-04 02:12:00	3.84719
2018-07-04 02:24:00	4.15092
2018-07-04 02:36:00	3.54347
2018-07-04 02:48:00	3.7122
2018-07-04 03:00:00	2.69978
2018-07-04 03:12:00	1.2824
2018-07-04 03:24:00	1.99109
2018-07-04 03:36:00	3.84719
2018-07-04 03:48:00	3.27349
2018-07-04 04:00:00	1.58612
2018-07-04 04:12:00	2.86852
2018-07-04 04:24:00	2.83477
2018-07-04 04:36:00	3.27349
2018-07-04 04:48:00	1.72111
2018-07-04 05:00:00	3.1385
2018-07-04 05:12:00	3.27349
2018-07-04 05:24:00	0
2018-07-04 05:36:00	0.438715
2018-07-04 05:48:00	2.15983
2018-07-04 06:00:00	1.99109
2018-07-04 06:12:00	1.8561
2018-07-04 06:24:00	3.7122
2018-07-04 06:36:00	2.29482
2018-07-04 06:48:00	1.8561
2018-07-04 07:00:00	5.29833
2018-07-04 07:12:00	2.69978
2018-07-04 07:24:00	2.29482
2018-07-04 07:36:00	3.44223
2018-07-04 07:48:00	2.86852
2018-07-04 08:00:00	2.69978
2018-07-04 08:12:00	3.98218
2018-07-04 08:24:00	2.86852
2018-07-04 08:36:00	6.14201
2018-07-04 08:48:00	3.00351
2018-07-04 09:00:00	5.43332
2018-07-04 09:12:00	3.00351
2018-07-04 09:24:00	4.72462
2018-07-04 09:36:00	4.28591
2018-07-04 09:48:00	4.4209
2018-07-04 10:00:00	2.29482
2018-07-04 10:12:00	2.69978
2018-07-04 10:24:00	4.4209
2018-07-04 10:36:00	6.98569
2018-07-04 10:48:00	3.98218
2018-07-04 11:00:00	5.70329
2018-07-04 11:12:00	6.14201
2018-07-04 11:24:00	7.12068
2018-07-04 11:36:00	5.5683
2018-07-04 11:48:00	6.14201
2018-07-04 12:00:00	5.12959
2018-07-04 12:12:00	5.43332
2018-07-04 12:24:00	5.26458
2018-07-04 12:36:00	7.42441
2018-07-04 12:48:00	4.72462
2018-07-04 13:00:00	5.29833
2018-07-04 13:12:00	4.69088
2018-07-04 13:24:00	5.29833
2018-07-04 13:36:00	4.85961
2018-07-04 13:48:00	3.57721
2018-07-04 14:00:00	4.72462
2018-07-04 14:12:00	3.00351
2018-07-04 14:24:00	1.55238
2018-07-04 14:36:00	4.4209
2018-07-04 14:48:00	4.4209
2018-07-04 15:00:00	6.54698
2018-07-04 15:12:00	3.57721
2018-07-04 15:24:00	2.29482
2018-07-04 15:36:00	4.15092
2018-07-04 15:48:00	4.69088
2018-07-04 16:00:00	4.72462
2018-07-04 16:12:00	4.9946
2018-07-04 16:24:00	3.57721
2018-07-04 16:36:00	2.5648
2018-07-04 16:48:00	5.26458
2018-07-04 17:00:00	5.5683
2018-07-04 17:12:00	5.29833
2018-07-04 17:24:00	7.12068
2018-07-04 17:36:00	6.8507
2018-07-04 17:48:00	4.85961
2018-07-04 18:00:00	3.27349
2018-07-04 18:12:00	6.14201
2018-07-04 18:24:00	6.41199
2018-07-04 18:36:00	4.72462
2018-07-04 18:48:00	7.42441
2018-07-04 19:00:00	5.12959
2018-07-04 19:12:00	5.43332
2018-07-04 19:24:00	5.70329
2018-07-04 19:36:00	4.9946
2018-07-04 19:48:00	5.43332
2018-07-04 20:00:00	6.8507
2018-07-04 20:12:00	3.7122
2018-07-04 20:24:00	4.55588
2018-07-04 20:36:00	6.98569
2018-07-04 20:48:00	9.55049
2018-07-04 21:00:00	7.12068
2018-07-04 21:12:00	8.43683
2018-07-04 21:24:00	8.97678
2018-07-04 21:36:00	6.58072
2018-07-04 21:48:00	6.98569
2018-07-04 22:00:00	6.58072
2018-07-04 22:12:00	6.71571
2018-07-04 22:24:00	6.71571
2018-07-04 22:36:00	9.85421
2018-07-04 22:48:00	8.26809
2018-07-04 23:00:00	7.12068
2018-07-04 23:12:00	8.57182
2018-07-04 23:24:00	8.26809
2018-07-04 23:36:00	7.82937
2018-07-04 23:48:00	7.12068
2018-07-05	8.84179
2018-07-05 00:12:00	6.8507
2018-07-05 00:24:00	8.1331
2018-07-05 00:36:00	5.87203
2018-07-05 00:48:00	3.40848
2018-07-05 01:00:00	4.9946
2018-07-05 01:12:00	4.28591
2018-07-05 01:24:00	6.14201
2018-07-05 01:36:00	6.98569
2018-07-05 01:48:00	5.26458
2018-07-05 02:00:00	6.14201
2018-07-05 02:12:00	4.4209
2018-07-05 02:24:00	6.14201
2018-07-05 02:36:00	2.42981
2018-07-05 02:48:00	3.7122
2018-07-05 03:00:00	3.98218
2018-07-05 03:12:00	1.8561
2018-07-05 03:24:00	4.4209
2018-07-05 03:36:00	5.12959
2018-07-05 03:48:00	5.12959
2018-07-05 04:00:00	8.57182
2018-07-05 04:12:00	7.42441
2018-07-05 04:24:00	8.40308
2018-07-05 04:36:00	7.12068
2018-07-05 04:48:00	7.42441
2018-07-05 05:00:00	6.277
2018-07-05 05:12:00	6.54698
2018-07-05 05:24:00	6.58072
2018-07-05 05:36:00	6.58072
2018-07-05 05:48:00	6.71571
2018-07-05 06:00:00	5.83828
2018-07-05 06:12:00	4.28591
2018-07-05 06:24:00	5.43332
2018-07-05 06:36:00	5.43332
2018-07-05 06:48:00	6.277
2018-07-05 07:00:00	3.98218
2018-07-05 07:12:00	5.43332
2018-07-05 07:24:00	4.55588
2018-07-05 07:36:00	4.55588
2018-07-05 07:48:00	5.83828
2018-07-05 08:00:00	4.55588
2018-07-05 08:12:00	3.27349
2018-07-05 08:24:00	5.70329
2018-07-05 08:36:00	7.15443
2018-07-05 08:48:00	4.69088
2018-07-05 09:00:00	4.11717
2018-07-05 09:12:00	5.83828
2018-07-05 09:24:00	3.7122
2018-07-05 09:36:00	4.85961
2018-07-05 09:48:00	5.43332
2018-07-05 10:00:00	6.41199
2018-07-05 10:12:00	4.69088
2018-07-05 10:24:00	5.12959
2018-07-05 10:36:00	4.55588
2018-07-05 10:48:00	6.41199
2018-07-05 11:00:00	4.9946
2018-07-05 11:12:00	4.69088
2018-07-05 11:24:00	5.5683
2018-07-05 11:36:00	5.83828
2018-07-05 11:48:00	2.5648
2018-07-05 12:00:00	5.29833
2018-07-05 12:12:00	5.5683
2018-07-05 12:24:00	5.12959
2018-07-05 12:36:00	3.7122
2018-07-05 12:48:00	3.7122
2018-07-05 13:00:00	3.84719
2018-07-05 13:12:00	3.27349
2018-07-05 13:24:00	4.28591
2018-07-05 13:36:00	3.1385
2018-07-05 13:48:00	1.01242
2018-07-05 14:00:00	3.7122
2018-07-05 14:12:00	2.86852
2018-07-05 14:24:00	4.15092
2018-07-05 14:36:00	1.99109
2018-07-05 14:48:00	2.69978
2018-07-05 15:00:00	2.12608
2018-07-05 15:12:00	1.2824
2018-07-05 15:24:00	0.303726
2018-07-05 15:36:00	2.29482
2018-07-05 15:48:00	3.1385
2018-07-05 16:00:00	2.12608
2018-07-05 16:12:00	4.11717
2018-07-05 16:24:00	1.72111
2018-07-05 16:36:00	1.99109
2018-07-05 16:48:00	3.00351
2018-07-05 17:00:00	2.12608
2018-07-05 17:12:00	3.00351
2018-07-05 17:24:00	1.8561
2018-07-05 17:36:00	3.44223
2018-07-05 17:48:00	1.99109
2018-07-05 18:00:00	1.8561
2018-07-05 18:12:00	1.72111
2018-07-05 18:24:00	0
2018-07-05 18:36:00	1.99109
2018-07-05 18:48:00	0
2018-07-05 19:00:00	0
2018-07-05 19:12:00	3.84719
2018-07-05 19:24:00	0
2018-07-05 19:36:00	3.00351
2018-07-05 19:48:00	0
2018-07-05 20:00:00	0.438715
2018-07-05 20:12:00	1.41739
2018-07-05 20:24:00	3.84719
2018-07-05 20:36:00	5.5683
2018-07-05 20:48:00	3.7122
2018-07-05 21:00:00	0.843683
2018-07-05 21:12:00	0
2018-07-05 21:24:00	2.69978
2018-07-05 21:36:00	0
2018-07-05 21:48:00	1.8561
2018-07-05 22:00:00	0
2018-07-05 22:12:00	0
2018-07-05 22:24:00	0.573704
2018-07-05 22:36:00	0
2018-07-05 22:48:00	0
2018-07-05 23:00:00	0
2018-07-05 23:12:00	1.01242
2018-07-05 23:24:00	1.41739
2018-07-05 23:36:00	2.5648
2018-07-05 23:48:00	0
2018-07-06	0
2018-07-06 00:12:00	0
2018-07-06 00:24:00	0
2018-07-06 00:36:00	0
2018-07-06 00:48:00	0
2018-07-06 01:00:00	1.41739
2018-07-06 01:12:00	0
2018-07-06 01:24:00	0
2018-07-06 01:36:00	0
2018-07-06 01:48:00	0
2018-07-06 02:00:00	0
2018-07-06 02:12:00	0
2018-07-06 02:24:00	0
2018-07-06 02:36:00	0
2018-07-06 02:48:00	0
2018-07-06 03:00:00	0
2018-07-06 03:12:00	2.29482
2018-07-06 03:24:00	1.2824
2018-07-06 03:36:00	1.14741
2018-07-06 03:48:00	3.40848
2018-07-06 04:00:00	1.01242
2018-07-06 04:12:00	1.8561
2018-07-06 04:24:00	1.72111
2018-07-06 04:36:00	1.01242
2018-07-06 04:48:00	1.72111
2018-07-06 05:00:00	0
2018-07-06 05:12:00	0.303726
2018-07-06 05:24:00	1.14741
2018-07-06 05:36:00	0.87743
2018-07-06 05:48:00	1.01242
2018-07-06 06:00:00	0
2018-07-06 06:12:00	0.134989
2018-07-06 06:24:00	0.438715
2018-07-06 06:36:00	1.41739
2018-07-06 06:48:00	1.2824
2018-07-06 07:00:00	3.00351
2018-07-06 07:12:00	2.29482
2018-07-06 07:24:00	2.69978
2018-07-06 07:36:00	0
2018-07-06 07:48:00	4.28591
2018-07-06 08:00:00	4.4209
2018-07-06 08:12:00	3.44223
2018-07-06 08:24:00	6.41199
2018-07-06 08:36:00	6.58072
2018-07-06 08:48:00	7.12068
2018-07-06 09:00:00	6.00702
2018-07-06 09:12:00	4.85961
2018-07-06 09:24:00	5.29833
2018-07-06 09:36:00	7.28942
2018-07-06 09:48:00	7.86312
2018-07-06 10:00:00	7.86312
2018-07-06 10:12:00	6.277
2018-07-06 10:24:00	5.97327
2018-07-06 10:36:00	5.70329
2018-07-06 10:48:00	6.14201
2018-07-06 11:00:00	7.99811
2018-07-06 11:12:00	7.42441
2018-07-06 11:24:00	6.14201
2018-07-06 11:36:00	7.28942
2018-07-06 11:48:00	7.28942
2018-07-06 12:00:00	5.43332
2018-07-06 12:12:00	7.12068
2018-07-06 12:24:00	5.70329
2018-07-06 12:36:00	3.00351
2018-07-06 12:48:00	4.69088
2018-07-06 13:00:00	5.12959
2018-07-06 13:12:00	4.4209
2018-07-06 13:24:00	3.00351
2018-07-06 13:36:00	2.42981
2018-07-06 13:48:00	0.708693
2018-07-06 14:00:00	4.85961
2018-07-06 14:12:00	4.55588
2018-07-06 14:24:00	5.12959
2018-07-06 14:36:00	3.57721
2018-07-06 14:48:00	3.00351
2018-07-06 15:00:00	2.5648
2018-07-06 15:12:00	0.708693
2018-07-06 15:24:00	1.2824
2018-07-06 15:36:00	0
2018-07-06 15:48:00	4.4209
2018-07-06 16:00:00	3.7122
2018-07-06 16:12:00	2.29482
2018-07-06 16:24:00	2.42981
2018-07-06 16:36:00	1.2824
2018-07-06 16:48:00	3.1385
2018-07-06 17:00:00	3.84719
2018-07-06 17:12:00	3.1385
2018-07-06 17:24:00	1.14741
2018-07-06 17:36:00	1.72111
2018-07-06 17:48:00	0
2018-07-06 18:00:00	1.2824
2018-07-06 18:12:00	0
2018-07-06 18:24:00	0
2018-07-06 18:36:00	0
2018-07-06 18:48:00	0
2018-07-06 19:00:00	0
2018-07-06 19:12:00	0
2018-07-06 19:24:00	0
2018-07-06 19:36:00	0
2018-07-06 19:48:00	0
2018-07-06 20:00:00	1.41739
2018-07-06 20:12:00	2.42981
2018-07-06 20:24:00	2.5648
2018-07-06 20:36:00	1.8561
2018-07-06 20:48:00	2.69978
2018-07-06 21:00:00	2.69978
2018-07-06 21:12:00	0
2018-07-06 21:24:00	0.843683
2018-07-06 21:36:00	0
2018-07-06 21:48:00	1.99109
2018-07-06 22:00:00	3.40848
2018-07-06 22:12:00	3.27349
2018-07-06 22:24:00	2.5648
2018-07-06 22:36:00	2.29482
2018-07-06 22:48:00	0
2018-07-06 23:00:00	1.99109
2018-07-06 23:12:00	0
2018-07-06 23:24:00	0
2018-07-06 23:36:00	0
2018-07-06 23:48:00	0
2018-07-07	0.134989
2018-07-07 00:12:00	1.41739
2018-07-07 00:24:00	1.14741
2018-07-07 00:36:00	0
2018-07-07 00:48:00	0
2018-07-07 01:00:00	2.86852
2018-07-07 01:12:00	0
2018-07-07 01:24:00	0
2018-07-07 01:36:00	0
2018-07-07 01:48:00	1.01242
2018-07-07 02:00:00	4.15092
2018-07-07 02:12:00	5.12959
2018-07-07 02:24:00	6.277
2018-07-07 02:36:00	4.28591
2018-07-07 02:48:00	5.12959
2018-07-07 03:00:00	6.58072
2018-07-07 03:12:00	6.277
2018-07-07 03:24:00	5.43332
2018-07-07 03:36:00	5.70329
2018-07-07 03:48:00	6.14201
2018-07-07 04:00:00	6.14201
2018-07-07 04:12:00	6.14201
2018-07-07 04:24:00	3.7122
2018-07-07 04:36:00	3.57721
2018-07-07 04:48:00	0.843683
2018-07-07 05:00:00	2.42981
2018-07-07 05:12:00	0.134989
2018-07-07 05:24:00	0
2018-07-07 05:36:00	1.14741
2018-07-07 05:48:00	1.41739
2018-07-07 06:00:00	4.15092
2018-07-07 06:12:00	2.42981
2018-07-07 06:24:00	1.8561
2018-07-07 06:36:00	1.58612
2018-07-07 06:48:00	0.708693
2018-07-07 07:00:00	4.9946
2018-07-07 07:12:00	2.83477
2018-07-07 07:24:00	3.40848
2018-07-07 07:36:00	3.7122
2018-07-07 07:48:00	0.843683
2018-07-07 08:00:00	0.87743
2018-07-07 08:12:00	6.71571
2018-07-07 08:24:00	5.70329
2018-07-07 08:36:00	6.00702
2018-07-07 08:48:00	7.99811
2018-07-07 09:00:00	7.86312
2018-07-07 09:12:00	8.26809
2018-07-07 09:24:00	9.01053
2018-07-07 09:36:00	5.5683
2018-07-07 09:48:00	7.86312
2018-07-07 10:00:00	10.1242
2018-07-07 10:12:00	12.689
2018-07-07 10:24:00	8.97678
2018-07-07 10:36:00	7.69438
2018-07-07 10:48:00	6.98569
2018-07-07 11:00:00	12.149
2018-07-07 11:12:00	9.55049
2018-07-07 11:24:00	8.26809
2018-07-07 11:36:00	8.1331
2018-07-07 11:48:00	7.15443
2018-07-07 12:00:00	8.1331
2018-07-07 12:12:00	9.55049
2018-07-07 12:24:00	6.41199
2018-07-07 12:36:00	5.5683
2018-07-07 12:48:00	4.9946
2018-07-07 13:00:00	6.00702
2018-07-07 13:12:00	7.42441
2018-07-07 13:24:00	6.58072
2018-07-07 13:36:00	4.9946
2018-07-07 13:48:00	4.01593
2018-07-07 14:00:00	3.40848
2018-07-07 14:12:00	4.85961
2018-07-07 14:24:00	4.11717
2018-07-07 14:36:00	0.134989
2018-07-07 14:48:00	4.11717
2018-07-07 15:00:00	3.00351
2018-07-07 15:12:00	2.42981
2018-07-07 15:24:00	0.573704
2018-07-07 15:36:00	4.28591
2018-07-07 15:48:00	0
2018-07-07 16:00:00	4.85961
2018-07-07 16:12:00	3.57721
2018-07-07 16:24:00	3.57721
2018-07-07 16:36:00	4.85961
2018-07-07 16:48:00	4.28591
2018-07-07 17:00:00	4.15092
2018-07-07 17:12:00	2.15983
2018-07-07 17:24:00	0
2018-07-07 17:36:00	3.40848
2018-07-07 17:48:00	2.69978
2018-07-07 18:00:00	2.86852
2018-07-07 18:12:00	1.99109
2018-07-07 18:24:00	0.573704
2018-07-07 18:36:00	2.29482
2018-07-07 18:48:00	1.01242
2018-07-07 19:00:00	2.5648
2018-07-07 19:12:00	2.69978
2018-07-07 19:24:00	3.1385
2018-07-07 19:36:00	4.4209
2018-07-07 19:48:00	2.12608
2018-07-07 20:00:00	3.44223
2018-07-07 20:12:00	5.43332
2018-07-07 20:24:00	4.11717
2018-07-07 20:36:00	4.4209
2018-07-07 20:48:00	5.83828
2018-07-07 21:00:00	4.28591
2018-07-07 21:12:00	2.29482
2018-07-07 21:24:00	2.29482
2018-07-07 21:36:00	2.12608
2018-07-07 21:48:00	0
2018-07-07 22:00:00	0.269978
2018-07-07 22:12:00	0.134989
2018-07-07 22:24:00	1.41739
2018-07-07 22:36:00	0
2018-07-07 22:48:00	0
2018-07-07 23:00:00	0
2018-07-07 23:12:00	0
2018-07-07 23:24:00	0
2018-07-07 23:36:00	0
2018-07-07 23:48:00	2.29482
2018-07-08	1.58612
2018-07-08 00:12:00	0
2018-07-08 00:24:00	3.00351
2018-07-08 00:36:00	4.9946
2018-07-08 00:48:00	3.1385
2018-07-08 01:00:00	4.15092
2018-07-08 01:12:00	6.41199
2018-07-08 01:24:00	6.14201
2018-07-08 01:36:00	4.85961
2018-07-08 01:48:00	4.55588
2018-07-08 02:00:00	6.54698
2018-07-08 02:12:00	5.26458
2018-07-08 02:24:00	7.69438
2018-07-08 02:36:00	5.70329
2018-07-08 02:48:00	6.71571
2018-07-08 03:00:00	6.58072
2018-07-08 03:12:00	7.69438
2018-07-08 03:24:00	8.84179
2018-07-08 03:36:00	5.5683
2018-07-08 03:48:00	5.26458
2018-07-08 04:00:00	6.14201
2018-07-08 04:12:00	4.9946
2018-07-08 04:24:00	5.43332
2018-07-08 04:36:00	6.98569
2018-07-08 04:48:00	7.25567
2018-07-08 05:00:00	5.70329
2018-07-08 05:12:00	4.9946
2018-07-08 05:24:00	4.55588
2018-07-08 05:36:00	1.72111
2018-07-08 05:48:00	3.57721
2018-07-08 06:00:00	3.1385
2018-07-08 06:12:00	2.69978
2018-07-08 06:24:00	0
2018-07-08 06:36:00	3.00351
2018-07-08 06:48:00	2.29482
2018-07-08 07:00:00	1.2824
2018-07-08 07:12:00	2.5648
2018-07-08 07:24:00	3.7122
2018-07-08 07:36:00	4.9946
2018-07-08 07:48:00	4.55588
2018-07-08 08:00:00	6.8507
2018-07-08 08:12:00	4.4209
2018-07-08 08:24:00	1.72111
2018-07-08 08:36:00	4.72462
2018-07-08 08:48:00	4.9946
2018-07-08 09:00:00	5.5683
2018-07-08 09:12:00	5.70329
2018-07-08 09:24:00	4.55588
2018-07-08 09:36:00	3.00351
2018-07-08 09:48:00	6.14201
2018-07-08 10:00:00	5.5683
2018-07-08 10:12:00	5.43332
2018-07-08 10:24:00	6.277
2018-07-08 10:36:00	6.71571
2018-07-08 10:48:00	4.9946
2018-07-08 11:00:00	6.41199
2018-07-08 11:12:00	5.12959
2018-07-08 11:24:00	6.8507
2018-07-08 11:36:00	5.12959
2018-07-08 11:48:00	5.29833
2018-07-08 12:00:00	4.28591
2018-07-08 12:12:00	4.69088
2018-07-08 12:24:00	3.27349
2018-07-08 12:36:00	3.7122
2018-07-08 12:48:00	0.843683
2018-07-08 13:00:00	3.1385
2018-07-08 13:12:00	3.40848
2018-07-08 13:24:00	3.57721
2018-07-08 13:36:00	1.2824
2018-07-08 13:48:00	1.41739
2018-07-08 14:00:00	0
2018-07-08 14:12:00	1.41739
2018-07-08 14:24:00	2.69978
2018-07-08 14:36:00	2.69978
2018-07-08 14:48:00	3.27349
2018-07-08 15:00:00	0
2018-07-08 15:12:00	0
2018-07-08 15:24:00	0
2018-07-08 15:36:00	2.29482
2018-07-08 15:48:00	1.01242
2018-07-08 16:00:00	1.99109
2018-07-08 16:12:00	2.5648
2018-07-08 16:24:00	1.2824
2018-07-08 16:36:00	0
2018-07-08 16:48:00	0
2018-07-08 17:00:00	0
2018-07-08 17:12:00	0
2018-07-08 17:24:00	0
2018-07-08 17:36:00	0
2018-07-08 17:48:00	0
2018-07-08 18:00:00	0
2018-07-08 18:12:00	0
2018-07-08 18:24:00	3.98218
2018-07-08 18:36:00	7.42441
2018-07-08 18:48:00	5.70329
2018-07-08 19:00:00	2.5648
2018-07-08 19:12:00	0.708693
2018-07-08 19:24:00	0
2018-07-08 19:36:00	0
2018-07-08 19:48:00	3.7122
2018-07-08 20:00:00	0.134989
2018-07-08 20:12:00	2.69978
2018-07-08 20:24:00	1.01242
2018-07-08 20:36:00	2.12608
2018-07-08 20:48:00	0
2018-07-08 21:00:00	0
2018-07-08 21:12:00	0
2018-07-08 21:24:00	0
2018-07-08 21:36:00	0
2018-07-08 21:48:00	0
2018-07-08 22:00:00	0
2018-07-08 22:12:00	0
2018-07-08 22:24:00	0
2018-07-08 22:36:00	1.99109
2018-07-08 22:48:00	0.843683
2018-07-08 23:00:00	1.01242
2018-07-08 23:12:00	0
2018-07-08 23:24:00	0
2018-07-08 23:36:00	0
2018-07-08 23:48:00	0
2018-07-09	0
2018-07-09 00:12:00	0
2018-07-09 00:24:00	0
2018-07-09 00:36:00	0
2018-07-09 00:48:00	2.42981
2018-07-09 01:00:00	3.1385
2018-07-09 01:12:00	0.708693
2018-07-09 01:24:00	1.99109
2018-07-09 01:36:00	2.29482
2018-07-09 01:48:00	2.86852
2018-07-09 02:00:00	2.12608
2018-07-09 02:12:00	2.29482
2018-07-09 02:24:00	0
2018-07-09 02:36:00	0.708693
2018-07-09 02:48:00	0
2018-07-09 03:00:00	0
2018-07-09 03:12:00	0
2018-07-09 03:24:00	3.27349
2018-07-09 03:36:00	0
2018-07-09 03:48:00	2.86852
2018-07-09 04:00:00	2.42981
2018-07-09 04:12:00	1.99109
2018-07-09 04:24:00	2.69978
2018-07-09 04:36:00	2.69978
2018-07-09 04:48:00	2.42981
2018-07-09 05:00:00	0.843683
2018-07-09 05:12:00	0
2018-07-09 05:24:00	1.01242
2018-07-09 05:36:00	1.8561
2018-07-09 05:48:00	2.42981
2018-07-09 06:00:00	1.01242
2018-07-09 06:12:00	4.55588
2018-07-09 06:24:00	5.29833
2018-07-09 06:36:00	4.4209
2018-07-09 06:48:00	3.7122
2018-07-09 07:00:00	3.44223
2018-07-09 07:12:00	0
2018-07-09 07:24:00	1.45113
2018-07-09 07:36:00	3.57721
2018-07-09 07:48:00	2.69978
2018-07-09 08:00:00	4.11717
2018-07-09 08:12:00	0.843683
2018-07-09 08:24:00	5.29833
2018-07-09 08:36:00	4.9946
2018-07-09 08:48:00	2.12608
2018-07-09 09:00:00	2.5648
2018-07-09 09:12:00	4.55588
2018-07-09 09:24:00	4.85961
2018-07-09 09:36:00	4.15092
2018-07-09 09:48:00	4.15092
2018-07-09 10:00:00	6.14201
2018-07-09 10:12:00	4.11717
2018-07-09 10:24:00	4.15092
2018-07-09 10:36:00	4.4209
2018-07-09 10:48:00	3.98218
2018-07-09 11:00:00	4.28591
2018-07-09 11:12:00	4.15092
2018-07-09 11:24:00	4.85961
2018-07-09 11:36:00	4.28591
2018-07-09 11:48:00	4.9946
2018-07-09 12:00:00	4.55588
2018-07-09 12:12:00	4.9946
2018-07-09 12:24:00	3.7122
2018-07-09 12:36:00	4.72462
2018-07-09 12:48:00	3.1385
2018-07-09 13:00:00	3.40848
2018-07-09 13:12:00	3.1385
2018-07-09 13:24:00	2.69978
2018-07-09 13:36:00	5.83828
2018-07-09 13:48:00	4.28591
2018-07-09 14:00:00	4.15092
2018-07-09 14:12:00	3.84719
2018-07-09 14:24:00	2.42981
2018-07-09 14:36:00	3.84719
2018-07-09 14:48:00	4.28591
2018-07-09 15:00:00	3.40848
2018-07-09 15:12:00	2.12608
2018-07-09 15:24:00	1.8561
2018-07-09 15:36:00	2.5648
2018-07-09 15:48:00	1.72111
2018-07-09 16:00:00	3.1385
2018-07-09 16:12:00	2.5648
2018-07-09 16:24:00	3.98218
2018-07-09 16:36:00	2.86852
2018-07-09 16:48:00	4.4209
2018-07-09 17:00:00	3.1385
2018-07-09 17:12:00	0
2018-07-09 17:24:00	0.303726
2018-07-09 17:36:00	0.303726
2018-07-09 17:48:00	0
2018-07-09 18:00:00	1.01242
2018-07-09 18:12:00	0
2018-07-09 18:24:00	7.42441
2018-07-09 18:36:00	7.99811
2018-07-09 18:48:00	8.1331
2018-07-09 19:00:00	5.70329
2018-07-09 19:12:00	4.55588
2018-07-09 19:24:00	0
2018-07-09 19:36:00	0.438715
2018-07-09 19:48:00	0.843683
2018-07-09 20:00:00	0
2018-07-09 20:12:00	0
2018-07-09 20:24:00	0.134989
2018-07-09 20:36:00	1.2824
2018-07-09 20:48:00	0
2018-07-09 21:00:00	0.134989
2018-07-09 21:12:00	0
2018-07-09 21:24:00	0.708693
2018-07-09 21:36:00	0
2018-07-09 21:48:00	1.41739
2018-07-09 22:00:00	0
2018-07-09 22:12:00	1.8561
2018-07-09 22:24:00	1.99109
2018-07-09 22:36:00	0
2018-07-09 22:48:00	0
2018-07-09 23:00:00	0
2018-07-09 23:12:00	0
2018-07-09 23:24:00	0
2018-07-09 23:36:00	0
2018-07-09 23:48:00	0
2018-07-10	0
2018-07-10 00:12:00	0
2018-07-10 00:24:00	1.14741
2018-07-10 00:36:00	0
2018-07-10 00:48:00	0
2018-07-10 01:00:00	0
2018-07-10 01:12:00	0.134989
2018-07-10 01:24:00	4.4209
2018-07-10 01:36:00	3.1385
2018-07-10 01:48:00	3.27349
2018-07-10 02:00:00	0
2018-07-10 02:12:00	0.708693
2018-07-10 02:24:00	0
2018-07-10 02:36:00	3.1385
2018-07-10 02:48:00	4.55588
2018-07-10 03:00:00	4.85961
2018-07-10 03:12:00	4.55588
2018-07-10 03:24:00	4.15092
2018-07-10 03:36:00	3.1385
2018-07-10 03:48:00	2.5648
2018-07-10 04:00:00	3.57721
2018-07-10 04:12:00	4.69088
2018-07-10 04:24:00	2.42981
2018-07-10 04:36:00	4.55588
2018-07-10 04:48:00	2.29482
2018-07-10 05:00:00	3.57721
2018-07-10 05:12:00	1.2824
2018-07-10 05:24:00	1.58612
2018-07-10 05:36:00	0
2018-07-10 05:48:00	2.29482
2018-07-10 06:00:00	2.86852
2018-07-10 06:12:00	0
2018-07-10 06:24:00	1.2824
2018-07-10 06:36:00	0
2018-07-10 06:48:00	2.42981
2018-07-10 07:00:00	2.15983
2018-07-10 07:12:00	2.83477
2018-07-10 07:24:00	2.15983
2018-07-10 07:36:00	2.29482
2018-07-10 07:48:00	2.42981
2018-07-10 08:00:00	2.12608
2018-07-10 08:12:00	3.1385
2018-07-10 08:24:00	4.85961
2018-07-10 08:36:00	2.29482
2018-07-10 08:48:00	4.28591
2018-07-10 09:00:00	4.9946
2018-07-10 09:12:00	3.40848
2018-07-10 09:24:00	4.4209
2018-07-10 09:36:00	3.98218
2018-07-10 09:48:00	4.4209
2018-07-10 10:00:00	3.27349
2018-07-10 10:12:00	3.84719
2018-07-10 10:24:00	6.41199
2018-07-10 10:36:00	5.70329
2018-07-10 10:48:00	4.28591
2018-07-10 11:00:00	4.4209
2018-07-10 11:12:00	5.5683
2018-07-10 11:24:00	4.11717
2018-07-10 11:36:00	4.55588
2018-07-10 11:48:00	4.85961
2018-07-10 12:00:00	2.12608
2018-07-10 12:12:00	4.4209
2018-07-10 12:24:00	2.12608
2018-07-10 12:36:00	4.28591
2018-07-10 12:48:00	2.29482
2018-07-10 13:00:00	4.69088
2018-07-10 13:12:00	2.86852
2018-07-10 13:24:00	4.28591
2018-07-10 13:36:00	4.72462
2018-07-10 13:48:00	2.12608
2018-07-10 14:00:00	3.40848
2018-07-10 14:12:00	2.69978
2018-07-10 14:24:00	3.40848
2018-07-10 14:36:00	3.27349
2018-07-10 14:48:00	3.40848
2018-07-10 15:00:00	3.40848
2018-07-10 15:12:00	1.99109
2018-07-10 15:24:00	2.29482
2018-07-10 15:36:00	2.29482
2018-07-10 15:48:00	1.72111
2018-07-10 16:00:00	1.99109
2018-07-10 16:12:00	0
2018-07-10 16:24:00	6.41199
2018-07-10 16:36:00	3.7122
2018-07-10 16:48:00	0
2018-07-10 17:00:00	0
2018-07-10 17:12:00	0
2018-07-10 17:24:00	0
2018-07-10 17:36:00	3.1385
2018-07-10 17:48:00	2.26107
2018-07-10 18:00:00	4.11717
2018-07-10 18:12:00	4.15092
2018-07-10 18:24:00	2.69978
2018-07-10 18:36:00	1.8561
2018-07-10 18:48:00	0
2018-07-10 19:00:00	0
2018-07-10 19:12:00	1.14741
2018-07-10 19:24:00	2.42981
2018-07-10 19:36:00	2.12608
2018-07-10 19:48:00	0.573704
2018-07-10 20:00:00	3.1385
2018-07-10 20:12:00	0.843683
2018-07-10 20:24:00	2.86852
2018-07-10 20:36:00	2.69978
2018-07-10 20:48:00	0
2018-07-10 21:00:00	0
2018-07-10 21:12:00	3.7122
2018-07-10 21:24:00	1.99109
2018-07-10 21:36:00	2.86852
2018-07-10 21:48:00	0.708693
2018-07-10 22:00:00	4.55588
2018-07-10 22:12:00	3.98218
2018-07-10 22:24:00	3.1385
2018-07-10 22:36:00	0
2018-07-10 22:48:00	0
2018-07-10 23:00:00	0
2018-07-10 23:12:00	2.42981
2018-07-10 23:24:00	1.72111
2018-07-10 23:36:00	1.41739
2018-07-10 23:48:00	3.84719
2018-07-11	1.72111
2018-07-11 00:12:00	2.86852
2018-07-11 00:24:00	0
2018-07-11 00:36:00	3.27349
2018-07-11 00:48:00	3.40848
2018-07-11 01:00:00	3.1385
2018-07-11 01:12:00	1.2824
2018-07-11 01:24:00	0
2018-07-11 01:36:00	1.01242
2018-07-11 01:48:00	0.573704
2018-07-11 02:00:00	1.99109
2018-07-11 02:12:00	2.5648
2018-07-11 02:24:00	3.00351
2018-07-11 02:36:00	3.57721
2018-07-11 02:48:00	3.27349
2018-07-11 03:00:00	3.1385
2018-07-11 03:12:00	3.27349
2018-07-11 03:24:00	4.55588
2018-07-11 03:36:00	2.86852
2018-07-11 03:48:00	0
2018-07-11 04:00:00	1.8561
2018-07-11 04:12:00	3.27349
2018-07-11 04:24:00	4.9946
2018-07-11 04:36:00	3.40848
2018-07-11 04:48:00	3.27349
2018-07-11 05:00:00	4.11717
2018-07-11 05:12:00	4.85961
2018-07-11 05:24:00	3.57721
2018-07-11 05:36:00	2.12608
2018-07-11 05:48:00	1.99109
2018-07-11 06:00:00	3.1385
2018-07-11 06:12:00	4.85961
2018-07-11 06:24:00	1.2824
2018-07-11 06:36:00	5.70329
2018-07-11 06:48:00	5.26458
2018-07-11 07:00:00	2.86852
2018-07-11 07:12:00	2.12608
2018-07-11 07:24:00	3.40848
2018-07-11 07:36:00	1.2824
2018-07-11 07:48:00	0.708693
2018-07-11 08:00:00	3.98218
2018-07-11 08:12:00	2.86852
2018-07-11 08:24:00	5.29833
2018-07-11 08:36:00	4.15092
2018-07-11 08:48:00	4.28591
2018-07-11 09:00:00	5.26458
2018-07-11 09:12:00	3.84719
2018-07-11 09:24:00	6.98569
2018-07-11 09:36:00	4.55588
2018-07-11 09:48:00	6.98569
2018-07-11 10:00:00	4.28591
2018-07-11 10:12:00	4.4209
2018-07-11 10:24:00	5.5683
2018-07-11 10:36:00	5.83828
2018-07-11 10:48:00	6.41199
2018-07-11 11:00:00	6.277
2018-07-11 11:12:00	4.4209
2018-07-11 11:24:00	4.9946
2018-07-11 11:36:00	5.83828
2018-07-11 11:48:00	6.8507
2018-07-11 12:00:00	4.15092
2018-07-11 12:12:00	6.00702
2018-07-11 12:24:00	2.29482
2018-07-11 12:36:00	4.4209
2018-07-11 12:48:00	4.4209
2018-07-11 13:00:00	7.42441
2018-07-11 13:12:00	6.98569
2018-07-11 13:24:00	4.15092
2018-07-11 13:36:00	3.57721
2018-07-11 13:48:00	5.5683
2018-07-11 14:00:00	5.87203
2018-07-11 14:12:00	6.277
2018-07-11 14:24:00	6.98569
2018-07-11 14:36:00	4.4209
2018-07-11 14:48:00	3.40848
2018-07-11 15:00:00	6.277
2018-07-11 15:12:00	3.98218
2018-07-11 15:24:00	4.72462
2018-07-11 15:36:00	3.7122
2018-07-11 15:48:00	3.1385
2018-07-11 16:00:00	3.27349
2018-07-11 16:12:00	4.69088
2018-07-11 16:24:00	4.28591
2018-07-11 16:36:00	3.84719
2018-07-11 16:48:00	2.12608
2018-07-11 17:00:00	1.41739
2018-07-11 17:12:00	1.2824
2018-07-11 17:24:00	2.69978
2018-07-11 17:36:00	2.5648
2018-07-11 17:48:00	3.54347
2018-07-11 18:00:00	2.42981
2018-07-11 18:12:00	1.2824
2018-07-11 18:24:00	1.99109
2018-07-11 18:36:00	0
2018-07-11 18:48:00	2.29482
2018-07-11 19:00:00	0
2018-07-11 19:12:00	2.29482
2018-07-11 19:24:00	0.708693
2018-07-11 19:36:00	0
2018-07-11 19:48:00	2.42981
2018-07-11 20:00:00	0
2018-07-11 20:12:00	0
2018-07-11 20:24:00	2.12608
2018-07-11 20:36:00	2.42981
2018-07-11 20:48:00	0
2018-07-11 21:00:00	3.1385
2018-07-11 21:12:00	2.42981
2018-07-11 21:24:00	4.15092
2018-07-11 21:36:00	3.84719
2018-07-11 21:48:00	3.7122
2018-07-11 22:00:00	3.84719
2018-07-11 22:12:00	2.5648
2018-07-11 22:24:00	0
2018-07-11 22:36:00	0
2018-07-11 22:48:00	0
2018-07-11 23:00:00	0
2018-07-11 23:12:00	3.27349
2018-07-11 23:24:00	3.40848
2018-07-11 23:36:00	1.8561
2018-07-11 23:48:00	4.55588
2018-07-12	2.29482
2018-07-12 00:12:00	3.1385
2018-07-12 00:24:00	1.8561
2018-07-12 00:36:00	4.28591
2018-07-12 00:48:00	3.98218
2018-07-12 01:00:00	4.28591
2018-07-12 01:12:00	0.438715
2018-07-12 01:24:00	0
2018-07-12 01:36:00	0
2018-07-12 01:48:00	0
2018-07-12 02:00:00	0.573704
2018-07-12 02:12:00	1.8561
2018-07-12 02:24:00	0
2018-07-12 02:36:00	0
2018-07-12 02:48:00	0.573704
2018-07-12 03:00:00	3.98218
2018-07-12 03:12:00	0
2018-07-12 03:24:00	1.01242
2018-07-12 03:36:00	0.134989
2018-07-12 03:48:00	0
2018-07-12 04:00:00	0
2018-07-12 04:12:00	0
2018-07-12 04:24:00	0.134989
2018-07-12 04:36:00	0
2018-07-12 04:48:00	2.29482
2018-07-12 05:00:00	1.41739
2018-07-12 05:12:00	5.12959
2018-07-12 05:24:00	3.98218
2018-07-12 05:36:00	3.7122
2018-07-12 05:48:00	4.72462
2018-07-12 06:00:00	3.7122
2018-07-12 06:12:00	1.58612
2018-07-12 06:24:00	1.41739
2018-07-12 06:36:00	2.12608
2018-07-12 06:48:00	2.29482
2018-07-12 07:00:00	3.1385
2018-07-12 07:12:00	4.85961
2018-07-12 07:24:00	3.84719
2018-07-12 07:36:00	0
2018-07-12 07:48:00	0
2018-07-12 08:00:00	3.40848
2018-07-12 08:12:00	2.42981
2018-07-12 08:24:00	3.00351
2018-07-12 08:36:00	0.303726
2018-07-12 08:48:00	3.54347
2018-07-12 09:00:00	3.7122
2018-07-12 09:12:00	3.1385
2018-07-12 09:24:00	4.15092
2018-07-12 09:36:00	3.84719
2018-07-12 09:48:00	2.83477
2018-07-12 10:00:00	3.1385
2018-07-12 10:12:00	4.4209
2018-07-12 10:24:00	4.28591
2018-07-12 10:36:00	5.26458
2018-07-12 10:48:00	6.41199
2018-07-12 11:00:00	4.85961
2018-07-12 11:12:00	7.42441
2018-07-12 11:24:00	4.55588
2018-07-12 11:36:00	6.98569
2018-07-12 11:48:00	7.69438
2018-07-12 12:00:00	5.29833
2018-07-12 12:12:00	5.12959
2018-07-12 12:24:00	4.9946
2018-07-12 12:36:00	3.27349
2018-07-12 12:48:00	4.85961
2018-07-12 13:00:00	4.72462
2018-07-12 13:12:00	4.15092
2018-07-12 13:24:00	3.98218
2018-07-12 13:36:00	3.57721
2018-07-12 13:48:00	2.5648
2018-07-12 14:00:00	3.1385
2018-07-12 14:12:00	3.84719
2018-07-12 14:24:00	3.27349
2018-07-12 14:36:00	1.8561
2018-07-12 14:48:00	3.27349
2018-07-12 15:00:00	3.40848
2018-07-12 15:12:00	1.58612
2018-07-12 15:24:00	3.84719
2018-07-12 15:36:00	0
2018-07-12 15:48:00	1.72111
2018-07-12 16:00:00	3.27349
2018-07-12 16:12:00	4.72462
2018-07-12 16:24:00	3.00351
2018-07-12 16:36:00	3.00351
2018-07-12 16:48:00	3.40848
2018-07-12 17:00:00	2.42981
2018-07-12 17:12:00	1.72111
2018-07-12 17:24:00	2.29482
2018-07-12 17:36:00	2.29482
2018-07-12 17:48:00	0
2018-07-12 18:00:00	0
2018-07-12 18:12:00	0
2018-07-12 18:24:00	0
2018-07-12 18:36:00	0
2018-07-12 18:48:00	0
2018-07-12 19:00:00	0
2018-07-12 19:12:00	0
2018-07-12 19:24:00	0
2018-07-12 19:36:00	0
2018-07-12 19:48:00	0
2018-07-12 20:00:00	0
2018-07-12 20:12:00	0
2018-07-12 20:24:00	2.12608
2018-07-12 20:36:00	1.14741
2018-07-12 20:48:00	3.57721
2018-07-12 21:00:00	3.40848
2018-07-12 21:12:00	3.00351
2018-07-12 21:24:00	3.1385
2018-07-12 21:36:00	0
2018-07-12 21:48:00	1.8561
2018-07-12 22:00:00	2.12608
2018-07-12 22:12:00	3.00351
2018-07-12 22:24:00	4.11717
2018-07-12 22:36:00	4.9946
2018-07-12 22:48:00	4.28591
2018-07-12 23:00:00	3.00351
2018-07-12 23:12:00	0.438715
2018-07-12 23:24:00	3.1385
2018-07-12 23:36:00	2.86852
2018-07-12 23:48:00	2.12608
2018-07-13	2.29482
2018-07-13 00:12:00	1.72111
2018-07-13 00:24:00	0
2018-07-13 00:36:00	0
2018-07-13 00:48:00	0
2018-07-13 01:00:00	0
2018-07-13 01:12:00	0
2018-07-13 01:24:00	0.708693
2018-07-13 01:36:00	0
2018-07-13 01:48:00	0
2018-07-13 02:00:00	0
2018-07-13 02:12:00	0
2018-07-13 02:24:00	0
2018-07-13 02:36:00	0
2018-07-13 02:48:00	0.269978
2018-07-13 03:00:00	1.41739
2018-07-13 03:12:00	1.01242
2018-07-13 03:24:00	0.708693
2018-07-13 03:36:00	0
2018-07-13 03:48:00	0
2018-07-13 04:00:00	0
2018-07-13 04:12:00	0
2018-07-13 04:24:00	0
2018-07-13 04:36:00	1.72111
2018-07-13 04:48:00	2.12608
2018-07-13 05:00:00	0
2018-07-13 05:12:00	0
2018-07-13 05:24:00	0
2018-07-13 05:36:00	0
2018-07-13 05:48:00	0.134989
2018-07-13 06:00:00	0
2018-07-13 06:12:00	0.438715
2018-07-13 06:24:00	0
2018-07-13 06:36:00	0
2018-07-13 06:48:00	0
2018-07-13 07:00:00	0
2018-07-13 07:12:00	0
2018-07-13 07:24:00	0
2018-07-13 07:36:00	0
2018-07-13 07:48:00	0
2018-07-13 08:00:00	1.72111
2018-07-13 08:12:00	0.303726
2018-07-13 08:24:00	1.99109
2018-07-13 08:36:00	2.42981
2018-07-13 08:48:00	3.00351
2018-07-13 09:00:00	3.40848
2018-07-13 09:12:00	2.69978
2018-07-13 09:24:00	3.57721
2018-07-13 09:36:00	3.57721
2018-07-13 09:48:00	3.98218
2018-07-13 10:00:00	4.11717
2018-07-13 10:12:00	4.4209
2018-07-13 10:24:00	4.28591
2018-07-13 10:36:00	4.85961
2018-07-13 10:48:00	4.85961
2018-07-13 11:00:00	3.57721
2018-07-13 11:12:00	3.98218
2018-07-13 11:24:00	2.5648
2018-07-13 11:36:00	2.12608
2018-07-13 11:48:00	0.708693
2018-07-13 12:00:00	1.8561
2018-07-13 12:12:00	3.00351
2018-07-13 12:24:00	4.11717
2018-07-13 12:36:00	3.7122
2018-07-13 12:48:00	1.55238
2018-07-13 13:00:00	2.69978
2018-07-13 13:12:00	1.2824
2018-07-13 13:24:00	4.85961
2018-07-13 13:36:00	2.29482
2018-07-13 13:48:00	0.843683
2018-07-13 14:00:00	2.42981
2018-07-13 14:12:00	3.7122
2018-07-13 14:24:00	1.8561
2018-07-13 14:36:00	3.40848
2018-07-13 14:48:00	1.41739
2018-07-13 15:00:00	0.438715
2018-07-13 15:12:00	1.58612
2018-07-13 15:24:00	3.44223
2018-07-13 15:36:00	4.15092
2018-07-13 15:48:00	2.42981
2018-07-13 16:00:00	2.5648
2018-07-13 16:12:00	1.72111
2018-07-13 16:24:00	0
2018-07-13 16:36:00	0
2018-07-13 16:48:00	0
2018-07-13 17:00:00	0
2018-07-13 17:12:00	2.29482
2018-07-13 17:24:00	0
2018-07-13 17:36:00	0.134989
2018-07-13 17:48:00	1.55238
2018-07-13 18:00:00	0
2018-07-13 18:12:00	0
2018-07-13 18:24:00	0
2018-07-13 18:36:00	0
2018-07-13 18:48:00	0
2018-07-13 19:00:00	0
2018-07-13 19:12:00	0
2018-07-13 19:24:00	0
2018-07-13 19:36:00	6.00702
2018-07-13 19:48:00	6.00702
2018-07-13 20:00:00	2.69978
2018-07-13 20:12:00	3.84719
2018-07-13 20:24:00	4.28591
2018-07-13 20:36:00	3.7122
2018-07-13 20:48:00	1.2824
2018-07-13 21:00:00	1.41739
2018-07-13 21:12:00	0
2018-07-13 21:24:00	3.27349
2018-07-13 21:36:00	2.42981
2018-07-13 21:48:00	0
2018-07-13 22:00:00	0.269978
2018-07-13 22:12:00	0
2018-07-13 22:24:00	3.1385
2018-07-13 22:36:00	2.5648
2018-07-13 22:48:00	3.27349
2018-07-13 23:00:00	3.00351
2018-07-13 23:12:00	2.29482
2018-07-13 23:24:00	1.58612
2018-07-13 23:36:00	2.12608
2018-07-13 23:48:00	1.01242
2018-07-14	0
2018-07-14 00:12:00	0
2018-07-14 00:24:00	0
2018-07-14 00:36:00	0.303726
2018-07-14 00:48:00	3.00351
2018-07-14 01:00:00	1.14741
2018-07-14 01:12:00	0
2018-07-14 01:24:00	0.708693
2018-07-14 01:36:00	0
2018-07-14 01:48:00	0
2018-07-14 02:00:00	0
2018-07-14 02:12:00	1.01242
2018-07-14 02:24:00	3.40848
2018-07-14 02:36:00	2.69978
2018-07-14 02:48:00	3.27349
2018-07-14 03:00:00	0
2018-07-14 03:12:00	0
2018-07-14 03:24:00	2.86852
2018-07-14 03:36:00	0.134989
2018-07-14 03:48:00	0
2018-07-14 04:00:00	2.42981
2018-07-14 04:12:00	0
2018-07-14 04:24:00	3.7122
2018-07-14 04:36:00	1.01242
2018-07-14 04:48:00	0
2018-07-14 05:00:00	1.01242
2018-07-14 05:12:00	0
2018-07-14 05:24:00	0
2018-07-14 05:36:00	1.72111
2018-07-14 05:48:00	1.8561
2018-07-14 06:00:00	3.00351
2018-07-14 06:12:00	4.11717
2018-07-14 06:24:00	3.00351
2018-07-14 06:36:00	1.72111
2018-07-14 06:48:00	3.27349
2018-07-14 07:00:00	3.1385
2018-07-14 07:12:00	2.12608
2018-07-14 07:24:00	1.8561
2018-07-14 07:36:00	2.29482
2018-07-14 07:48:00	1.72111
2018-07-14 08:00:00	2.12608
2018-07-14 08:12:00	3.40848
2018-07-14 08:24:00	4.55588
2018-07-14 08:36:00	3.98218
2018-07-14 08:48:00	2.86852
2018-07-14 09:00:00	4.72462
2018-07-14 09:12:00	4.85961
2018-07-14 09:24:00	6.00702
2018-07-14 09:36:00	6.58072
2018-07-14 09:48:00	5.26458
2018-07-14 10:00:00	6.277
2018-07-14 10:12:00	6.41199
2018-07-14 10:24:00	4.4209
2018-07-14 10:36:00	3.40848
2018-07-14 10:48:00	7.12068
2018-07-14 11:00:00	8.26809
2018-07-14 11:12:00	6.00702
2018-07-14 11:24:00	5.5683
2018-07-14 11:36:00	4.55588
2018-07-14 11:48:00	5.12959
2018-07-14 12:00:00	3.1385
2018-07-14 12:12:00	4.9946
2018-07-14 12:24:00	3.57721
2018-07-14 12:36:00	3.7122
2018-07-14 12:48:00	4.85961
2018-07-14 13:00:00	4.85961
2018-07-14 13:12:00	3.7122
2018-07-14 13:24:00	4.28591
2018-07-14 13:36:00	5.12959
2018-07-14 13:48:00	3.1385
2018-07-14 14:00:00	3.40848
2018-07-14 14:12:00	3.7122
2018-07-14 14:24:00	4.4209
2018-07-14 14:36:00	6.14201
2018-07-14 14:48:00	4.85961
2018-07-14 15:00:00	4.55588
2018-07-14 15:12:00	4.55588
2018-07-14 15:24:00	4.4209
2018-07-14 15:36:00	3.7122
2018-07-14 15:48:00	6.98569
2018-07-14 16:00:00	5.83828
2018-07-14 16:12:00	5.12959
2018-07-14 16:24:00	4.85961
2018-07-14 16:36:00	3.57721
2018-07-14 16:48:00	4.9946
2018-07-14 17:00:00	4.28591
2018-07-14 17:12:00	5.43332
2018-07-14 17:24:00	4.28591
2018-07-14 17:36:00	3.1385
2018-07-14 17:48:00	0
2018-07-14 18:00:00	1.99109
2018-07-14 18:12:00	4.11717
2018-07-14 18:24:00	3.00351
2018-07-14 18:36:00	4.15092
2018-07-14 18:48:00	1.14741
2018-07-14 19:00:00	0.438715
2018-07-14 19:12:00	2.42981
2018-07-14 19:24:00	2.5648
2018-07-14 19:36:00	3.7122
2018-07-14 19:48:00	2.86852
2018-07-14 20:00:00	0
2018-07-14 20:12:00	0.303726
2018-07-14 20:24:00	0
2018-07-14 20:36:00	0
2018-07-14 20:48:00	0.438715
2018-07-14 21:00:00	1.55238
2018-07-14 21:12:00	2.83477
2018-07-14 21:24:00	3.27349
2018-07-14 21:36:00	3.98218
2018-07-14 21:48:00	3.57721
2018-07-14 22:00:00	5.43332
2018-07-14 22:12:00	4.85961
2018-07-14 22:24:00	4.9946
2018-07-14 22:36:00	2.5648
2018-07-14 22:48:00	2.83477
2018-07-14 23:00:00	2.69978
2018-07-14 23:12:00	3.27349
2018-07-14 23:24:00	0
2018-07-14 23:36:00	0
2018-07-14 23:48:00	0
2018-07-15	0
2018-07-15 00:12:00	1.01242
2018-07-15 00:24:00	1.2824
2018-07-15 00:36:00	0
2018-07-15 00:48:00	0
2018-07-15 01:00:00	0
2018-07-15 01:12:00	0
2018-07-15 01:24:00	0
2018-07-15 01:36:00	0
2018-07-15 01:48:00	0
2018-07-15 02:00:00	0
2018-07-15 02:12:00	0
2018-07-15 02:24:00	0
2018-07-15 02:36:00	0
2018-07-15 02:48:00	0
2018-07-15 03:00:00	0
2018-07-15 03:12:00	0
2018-07-15 03:24:00	1.99109
2018-07-15 03:36:00	0
2018-07-15 03:48:00	0
2018-07-15 04:00:00	0
2018-07-15 04:12:00	0
2018-07-15 04:24:00	3.84719
2018-07-15 04:36:00	3.00351
2018-07-15 04:48:00	3.40848
2018-07-15 05:00:00	3.40848
2018-07-15 05:12:00	3.00351
2018-07-15 05:24:00	1.01242
2018-07-15 05:36:00	4.55588
2018-07-15 05:48:00	1.55238
2018-07-15 06:00:00	1.72111
2018-07-15 06:12:00	0
2018-07-15 06:24:00	0
2018-07-15 06:36:00	0
2018-07-15 06:48:00	0
2018-07-15 07:00:00	0
2018-07-15 07:12:00	1.01242
2018-07-15 07:24:00	0
2018-07-15 07:36:00	0
2018-07-15 07:48:00	3.27349
2018-07-15 08:00:00	3.1385
2018-07-15 08:12:00	3.84719
2018-07-15 08:24:00	4.4209
2018-07-15 08:36:00	4.72462
2018-07-15 08:48:00	5.43332
2018-07-15 09:00:00	3.7122
2018-07-15 09:12:00	4.55588
2018-07-15 09:24:00	5.12959
2018-07-15 09:36:00	5.43332
2018-07-15 09:48:00	6.00702
2018-07-15 10:00:00	7.12068
2018-07-15 10:12:00	4.15092
2018-07-15 10:24:00	5.5683
2018-07-15 10:36:00	4.4209
2018-07-15 10:48:00	4.85961
2018-07-15 11:00:00	6.71571
2018-07-15 11:12:00	6.00702
2018-07-15 11:24:00	4.28591
2018-07-15 11:36:00	5.83828
2018-07-15 11:48:00	3.84719
2018-07-15 12:00:00	6.41199
2018-07-15 12:12:00	2.69978
2018-07-15 12:24:00	4.9946
2018-07-15 12:36:00	5.83828
2018-07-15 12:48:00	4.55588
2018-07-15 13:00:00	3.54347
2018-07-15 13:12:00	5.5683
2018-07-15 13:24:00	4.69088
2018-07-15 13:36:00	2.15983
2018-07-15 13:48:00	5.5683
2018-07-15 14:00:00	2.69978
2018-07-15 14:12:00	3.98218
2018-07-15 14:24:00	3.40848
2018-07-15 14:36:00	5.43332
2018-07-15 14:48:00	3.98218
2018-07-15 15:00:00	5.12959
2018-07-15 15:12:00	4.28591
2018-07-15 15:24:00	1.8561
2018-07-15 15:36:00	4.28591
2018-07-15 15:48:00	3.98218
2018-07-15 16:00:00	3.40848
2018-07-15 16:12:00	1.58612
2018-07-15 16:24:00	3.27349
2018-07-15 16:36:00	4.55588
2018-07-15 16:48:00	7.25567
2018-07-15 17:00:00	4.55588
2018-07-15 17:12:00	2.69978
2018-07-15 17:24:00	1.41739
2018-07-15 17:36:00	0
2018-07-15 17:48:00	0
2018-07-15 18:00:00	0
2018-07-15 18:12:00	0
2018-07-15 18:24:00	0
2018-07-15 18:36:00	0
2018-07-15 18:48:00	4.15092
2018-07-15 19:00:00	3.84719
2018-07-15 19:12:00	1.99109
2018-07-15 19:24:00	2.5648
2018-07-15 19:36:00	3.98218
2018-07-15 19:48:00	2.83477
2018-07-15 20:00:00	1.58612
2018-07-15 20:12:00	3.00351
2018-07-15 20:24:00	2.83477
2018-07-15 20:36:00	2.12608
2018-07-15 20:48:00	1.14741
2018-07-15 21:00:00	3.40848
2018-07-15 21:12:00	3.44223
2018-07-15 21:24:00	2.83477
2018-07-15 21:36:00	3.00351
2018-07-15 21:48:00	2.5648
2018-07-15 22:00:00	3.40848
2018-07-15 22:12:00	6.277
2018-07-15 22:24:00	5.87203
2018-07-15 22:36:00	4.55588
2018-07-15 22:48:00	3.57721
2018-07-15 23:00:00	1.01242
2018-07-15 23:12:00	0.438715
2018-07-15 23:24:00	0
2018-07-15 23:36:00	1.58612
2018-07-15 23:48:00	2.29482
2018-07-16	1.2824
2018-07-16 00:12:00	2.86852
2018-07-16 00:24:00	4.28591
2018-07-16 00:36:00	4.15092
2018-07-16 00:48:00	3.7122
2018-07-16 01:00:00	6.00702
2018-07-16 01:12:00	5.12959
2018-07-16 01:24:00	4.15092
2018-07-16 01:36:00	1.8561
2018-07-16 01:48:00	2.42981
2018-07-16 02:00:00	1.99109
2018-07-16 02:12:00	3.1385
2018-07-16 02:24:00	1.99109
2018-07-16 02:36:00	3.57721
2018-07-16 02:48:00	0
2018-07-16 03:00:00	2.15983
2018-07-16 03:12:00	2.5648
2018-07-16 03:24:00	0
2018-07-16 03:36:00	0.573704
2018-07-16 03:48:00	1.41739
2018-07-16 04:00:00	2.12608
2018-07-16 04:12:00	0
2018-07-16 04:24:00	1.01242
2018-07-16 04:36:00	0
2018-07-16 04:48:00	0
2018-07-16 05:00:00	0
2018-07-16 05:12:00	2.12608
2018-07-16 05:24:00	0
2018-07-16 05:36:00	0
2018-07-16 05:48:00	0
2018-07-16 06:00:00	0
2018-07-16 06:12:00	1.14741
2018-07-16 06:24:00	1.58612
2018-07-16 06:36:00	0
2018-07-16 06:48:00	0
2018-07-16 07:00:00	1.2824
2018-07-16 07:12:00	1.99109
2018-07-16 07:24:00	2.86852
2018-07-16 07:36:00	0.843683
2018-07-16 07:48:00	3.98218
2018-07-16 08:00:00	3.1385
2018-07-16 08:12:00	1.41739
2018-07-16 08:24:00	4.11717
2018-07-16 08:36:00	7.28942
2018-07-16 08:48:00	6.8507
2018-07-16 09:00:00	7.82937
2018-07-16 09:12:00	6.98569
2018-07-16 09:24:00	8.1331
2018-07-16 09:36:00	5.70329
2018-07-16 09:48:00	4.15092
2018-07-16 10:00:00	6.58072
2018-07-16 10:12:00	8.57182
2018-07-16 10:24:00	5.43332
2018-07-16 10:36:00	5.29833
2018-07-16 10:24:00	8.43683
2018-07-16 10:36:00	7.99811
2018-07-16 10:48:00	7.28942
2018-07-16 11:00:00	7.99811
2018-07-16 11:12:00	8.84179
2018-07-16 11:24:00	8.1331
2018-07-16 11:36:00	8.7068
2018-07-16 11:48:00	7.82937
2018-07-16 12:00:00	6.58072
2018-07-16 12:12:00	5.5683
2018-07-16 12:24:00	5.26458
2018-07-16 12:36:00	6.41199
2018-07-16 12:48:00	4.4209
2018-07-16 13:00:00	4.85961
2018-07-16 13:12:00	5.29833
2018-07-16 13:24:00	4.4209
2018-07-16 13:36:00	3.98218
2018-07-16 13:48:00	3.84719
2018-07-16 14:00:00	2.12608
2018-07-16 14:12:00	4.11717
2018-07-16 14:24:00	1.72111
2018-07-16 14:36:00	4.15092
2018-07-16 14:48:00	1.2824
2018-07-16 15:00:00	4.9946
2018-07-16 15:12:00	3.00351
2018-07-16 15:24:00	1.58612
2018-07-16 15:36:00	3.84719
2018-07-16 15:48:00	3.27349
2018-07-16 16:00:00	2.83477
2018-07-16 16:12:00	2.5648
2018-07-16 16:24:00	4.15092
2018-07-16 16:36:00	4.15092
2018-07-16 16:48:00	3.00351
2018-07-16 17:00:00	4.72462
2018-07-16 17:12:00	3.40848
2018-07-16 17:24:00	4.28591
2018-07-16 17:36:00	2.69978
2018-07-16 17:48:00	2.12608
2018-07-16 18:00:00	0
2018-07-16 18:12:00	1.41739
2018-07-16 18:24:00	0
2018-07-16 18:36:00	0
2018-07-16 18:48:00	0
2018-07-16 19:00:00	3.40848
2018-07-16 19:12:00	3.27349
2018-07-16 19:24:00	3.98218
2018-07-16 19:36:00	3.7122
2018-07-16 19:48:00	4.11717
2018-07-16 20:00:00	4.85961
2018-07-16 20:12:00	4.11717
2018-07-16 20:24:00	4.69088
2018-07-16 20:36:00	4.4209
2018-07-16 20:48:00	3.27349
2018-07-16 21:00:00	1.14741
2018-07-16 21:12:00	0
2018-07-16 21:24:00	0
2018-07-16 21:36:00	0
2018-07-16 21:48:00	0.843683
2018-07-16 22:00:00	0
2018-07-16 22:12:00	0
2018-07-16 22:24:00	1.01242
2018-07-16 22:36:00	2.12608
2018-07-16 22:48:00	0
2018-07-16 23:00:00	1.2824
2018-07-16 23:12:00	1.99109
2018-07-16 23:24:00	0
2018-07-16 23:36:00	0.708693
2018-07-16 23:48:00	2.12608
2018-07-17	0.134989
2018-07-17 00:12:00	0.843683
2018-07-17 00:24:00	2.86852
2018-07-17 00:36:00	1.14741
2018-07-17 00:48:00	2.42981
2018-07-17 01:00:00	3.1385
2018-07-17 01:12:00	1.8561
2018-07-17 01:24:00	0.708693
2018-07-17 01:36:00	2.42981
2018-07-17 01:48:00	0
2018-07-17 02:00:00	0
2018-07-17 02:12:00	0
2018-07-17 02:24:00	0
2018-07-17 02:36:00	0
2018-07-17 02:48:00	0
2018-07-17 03:00:00	0
2018-07-17 03:12:00	0
2018-07-17 03:24:00	0
2018-07-17 03:36:00	0
2018-07-17 03:48:00	0
2018-07-17 04:00:00	0
2018-07-17 04:12:00	0.134989
2018-07-17 04:24:00	0
2018-07-17 04:36:00	0
2018-07-17 04:48:00	0
2018-07-17 05:00:00	0
2018-07-17 05:12:00	0.843683
2018-07-17 05:24:00	0
2018-07-17 05:36:00	0.269978
2018-07-17 05:48:00	0
2018-07-17 06:00:00	0
2018-07-17 06:12:00	0
2018-07-17 06:24:00	0
2018-07-17 06:36:00	0
2018-07-17 06:48:00	0
2018-07-17 07:00:00	0
2018-07-17 07:12:00	0
2018-07-17 07:24:00	0
2018-07-17 07:36:00	0
2018-07-17 07:48:00	0
2018-07-17 08:00:00	1.72111
2018-07-17 08:12:00	2.69978
2018-07-17 08:24:00	4.55588
2018-07-17 08:36:00	3.7122
2018-07-17 08:48:00	4.9946
2018-07-17 09:00:00	4.28591
2018-07-17 09:12:00	4.28591
2018-07-17 09:24:00	3.27349
2018-07-17 09:36:00	3.98218
2018-07-17 09:48:00	4.9946
2018-07-17 10:00:00	2.86852
2018-07-17 10:12:00	4.85961
2018-07-17 10:24:00	4.28591
2018-07-17 10:36:00	3.40848
2018-07-17 10:48:00	1.01242
2018-07-17 11:00:00	2.29482
2018-07-17 11:12:00	3.54347
2018-07-17 11:24:00	3.27349
2018-07-17 11:36:00	3.27349
2018-07-17 11:48:00	4.28591
2018-07-17 12:00:00	2.26107
2018-07-17 12:12:00	1.2824
2018-07-17 12:24:00	3.7122
2018-07-17 12:36:00	3.84719
2018-07-17 12:48:00	5.12959
2018-07-17 13:00:00	2.5648
2018-07-17 13:12:00	2.42981
2018-07-17 13:24:00	1.41739
2018-07-17 13:36:00	4.55588
2018-07-17 13:48:00	0.708693
2018-07-17 14:00:00	2.5648
2018-07-17 14:12:00	2.5648
2018-07-17 14:24:00	2.12608
2018-07-17 14:36:00	4.28591
2018-07-17 14:48:00	4.15092
2018-07-17 15:00:00	3.98218
2018-07-17 15:12:00	1.58612
2018-07-17 15:24:00	5.43332
2018-07-17 15:36:00	5.43332
2018-07-17 15:48:00	3.1385
2018-07-17 16:00:00	4.85961
2018-07-17 16:12:00	3.00351
2018-07-17 16:24:00	2.5648
2018-07-17 16:36:00	3.57721
2018-07-17 16:48:00	3.98218
2018-07-17 17:00:00	4.28591
2018-07-17 17:12:00	2.42981
2018-07-17 17:24:00	2.29482
2018-07-17 17:36:00	2.83477
2018-07-17 17:48:00	1.8561
2018-07-17 18:00:00	3.1385
2018-07-17 18:12:00	1.14741
2018-07-17 18:24:00	1.2824
2018-07-17 18:36:00	0.303726
2018-07-17 18:48:00	0
2018-07-17 19:00:00	0
2018-07-17 19:12:00	0
2018-07-17 19:24:00	0
2018-07-17 19:36:00	0
2018-07-17 19:48:00	0
2018-07-17 20:00:00	0
2018-07-17 20:12:00	0
2018-07-17 20:24:00	0.134989
2018-07-17 20:36:00	0
2018-07-17 20:48:00	0
2018-07-17 21:00:00	0
2018-07-17 21:12:00	1.41739
2018-07-17 21:24:00	0
2018-07-17 21:36:00	0
2018-07-17 21:48:00	0
2018-07-17 22:00:00	0
2018-07-17 22:12:00	0
2018-07-17 22:24:00	1.41739
2018-07-17 22:36:00	1.41739
2018-07-17 22:48:00	3.7122
2018-07-17 23:00:00	0
2018-07-17 23:12:00	0
2018-07-17 23:24:00	2.42981
2018-07-17 23:36:00	0
2018-07-17 23:48:00	0
2018-07-18	0
2018-07-18 00:12:00	0
2018-07-18 00:24:00	0
2018-07-18 00:36:00	0
2018-07-18 00:48:00	0
2018-07-18 01:00:00	0
2018-07-18 01:12:00	0
2018-07-18 01:24:00	0
2018-07-18 01:36:00	0
2018-07-18 01:48:00	0
2018-07-18 02:00:00	0
2018-07-18 02:12:00	0
2018-07-18 02:24:00	1.8561
2018-07-18 02:36:00	0
2018-07-18 02:48:00	0
2018-07-18 03:00:00	0
2018-07-18 03:12:00	0
2018-07-18 03:24:00	0
2018-07-18 03:36:00	0
2018-07-18 03:48:00	0
2018-07-18 04:00:00	0
2018-07-18 04:12:00	0
2018-07-18 04:24:00	0
2018-07-18 04:36:00	0
2018-07-18 04:48:00	0
2018-07-18 05:00:00	0
2018-07-18 05:12:00	0
2018-07-18 05:24:00	0
2018-07-18 05:36:00	0
2018-07-18 05:48:00	0
2018-07-18 06:00:00	0
2018-07-18 06:12:00	0
2018-07-18 06:24:00	0
2018-07-18 06:36:00	0
2018-07-18 06:48:00	0
2018-07-18 07:00:00	0
2018-07-18 07:12:00	0.438715
2018-07-18 07:24:00	0.843683
2018-07-18 07:36:00	0
2018-07-18 07:48:00	0
2018-07-18 08:00:00	1.01242
2018-07-18 08:12:00	0
2018-07-18 08:24:00	3.57721
2018-07-18 08:36:00	3.1385
2018-07-18 08:48:00	2.5648
2018-07-18 09:00:00	4.28591
2018-07-18 09:12:00	2.5648
2018-07-18 09:24:00	2.69978
2018-07-18 09:36:00	1.58612
2018-07-18 09:48:00	3.84719
2018-07-18 10:00:00	3.40848
2018-07-18 10:12:00	2.86852
2018-07-18 10:24:00	4.15092
2018-07-18 10:36:00	3.40848
2018-07-18 10:48:00	3.40848
2018-07-18 11:00:00	4.15092
2018-07-18 11:12:00	2.42981
2018-07-18 11:24:00	2.42981
2018-07-18 11:36:00	1.99109
2018-07-18 11:48:00	2.42981
2018-07-18 12:00:00	0.708693
2018-07-18 12:12:00	2.15983
2018-07-18 12:24:00	4.4209
2018-07-18 12:36:00	2.12608
2018-07-18 12:48:00	2.12608
2018-07-18 13:00:00	2.29482
2018-07-18 13:12:00	0
2018-07-18 13:24:00	4.15092
2018-07-18 13:36:00	3.7122
2018-07-18 13:48:00	0.843683
2018-07-18 14:00:00	2.5648
2018-07-18 14:12:00	4.28591
2018-07-18 14:24:00	2.69978
2018-07-18 14:36:00	0.303726
2018-07-18 14:48:00	1.99109
2018-07-18 15:00:00	3.00351
2018-07-18 15:12:00	2.83477
2018-07-18 15:24:00	3.1385
2018-07-18 15:36:00	1.8561
2018-07-18 15:48:00	0.438715
2018-07-18 16:00:00	2.26107
2018-07-18 16:12:00	4.72462
2018-07-18 16:24:00	3.57721
2018-07-18 16:36:00	4.11717
2018-07-18 16:48:00	2.83477
2018-07-18 17:00:00	0.438715
2018-07-18 17:12:00	0
2018-07-18 17:24:00	1.14741
2018-07-18 17:36:00	1.01242
2018-07-18 17:48:00	0
2018-07-18 18:00:00	0
2018-07-18 18:12:00	0
2018-07-18 18:24:00	0
2018-07-18 18:36:00	0
2018-07-18 18:48:00	0
2018-07-18 19:00:00	0
2018-07-18 19:12:00	0
2018-07-18 19:24:00	0
2018-07-18 19:36:00	0
2018-07-18 19:48:00	0
2018-07-18 20:00:00	0
2018-07-18 20:12:00	0
[truncated: 1,434 more rows]
