# Supplementary material for: Determination of the Surface Roughness Parameter and Wind Shear Exponent of Kisii Region from the On-Site Measurement of Wind Profiles
Source: Hindawi journal article supplement (doi:10.1155/2019/8264061), 2019-07-01
Supplement: f1 [file 8264061.f1.zip › 8264061.f1/NYAMECHEO A ANALYSIS 2.xlsx]

## Sheet: Sheet1
				1	2	3	4	5	6	7	8	9	10	11	12	13	14	15	16	17	18	19	20	21	22	23	24	25	26	27	28	29	30	AVERAGE
			0	0	1.11366	2.65929	0.911177	0											0.283477	0	0.256479	0.114741	0.202484	0	0	0	1.16766	0.37122	0	0	0.141739	7.14093	0.863931	0.761339	0.5144	0.391633
			1	0.404968	0.519708	0.519708	0	0.708693											1.9101	0	0	0	0.99892	0.37122	0	0	0	0.857181	0	0	0	5.33207	2.28132	0.695194		0.357608
			2	0.256479	0.6277	1.82235	0.141739	0.0607451											0.148488	0	0	0	1.16766	0.114741	0	0	0.425216	1.68737	0	0	0	3.94168	3.59071	0.699244		0.359691
			3	0.0539957	1.12041	3.94168	0	1.84935											1.31614	0.0809935	0	0	0.229482	0	0	0	0	2.42306	0	0	0.0269978	3.30724	2.5108	0.843008		0.433643
			4	0	1.97084	4.85286	0	0											2.28132	0.99892	0	0.256479	0	0	0	0	0.398218	2.25432	1.82235	0	0	1.40389	0.681695	0.846045		0.435205
			5	2.76728	1.14066	3.1115	0.708693	1.59287											1.93709	0.0269978	0.485961	0	0	0	0.141739	0	0	1.82235	0.512959	0.317225	3.22624	3.56371	0	1.06776		0.549258
			6	1.56587	2.20032	2.68629	0	3.10475											0.37122	0.458963	0.431965	0.310475	0.796436	0	0	0	0	0.087743	0.087743	0	1.99784	3.28024	0.796436	0.908815		0.467494
			7	2.36231	3.79995	3.84044	2.4838	0.37122											0.398218	1.3094	0.398218	0	0	0	0.6277	0	0.0539957	0.600702	1.66037	0	1.76836	4.33315	1.68062	1.28442		0.660707
			8	2.99001	2.93602	5.22408	4.87986	0.256479											0.229482	0.310475	0	0.168737	1.71436	0.114741	0.114741	0.944924	0.776188	0.830184	1.2554	2.46355	2.27457	7.24892	5.0216	1.98772		1.02248
			9	4.50864	3.94168	5.79104	4.21841	0.884179											1.02592	2.25432	2.22057	2.68629	1.57262	2.79428	0.857182	0.6277	3.22624	3.7932	2.30832	4.56264	5.31183	5.31183	4.79212	3.13445		1.61236
			10	4.70437	5.87878	5.85178	3.25324	0.715443											3.46922	4.21841	4.62338	2.64579	3.50297	5.08234	2.4838	3.02376	2.68629	4.3399	2.03159	4.07667	4.70437	5.25783	6.277	3.94135		2.02743
			11	3.48272	5.48056	4.96085	2.80778	0.830184											4.13742	4.82586	4.53564	2.84152	3.7932	4.17117	3.20599	3.85394	2.96976	2.82127	3.21949	2.59854	5.91253	7.15443	7.39066	4.04968		2.08315
			12	2.55805	5.0216	3.25324	3.7122	2.31506										4.91867	4.56264	4.16442	4.70437	2.78753	3.53672	3.84719	3.99568	3.90794	3.36798	3.60421	3.59746	2.03159	4.73137	5.31182	7.90362	3.99206		2.05352
			13	4.30616	4.14417	2.08558	4.00243	2.85502										3.91469	4.56938	4.44789	5.76404	4.22516	5.12959	4.67738	3.48272	3.99568	3.90794	3.90794	5.53456	3.48272	3.59071	6.44573	8.33558	4.41929		2.27328
			14	4.62338	3.94168	2.31506	2.62554	4.60313										4.74487	4.85961	5.85178	5.60205	3.09125	4.71112	5.0216	3.7122	3.25324	1.70761	4.02943	4.3669	1.59962	3.48272	7.01944	6.78996	4.1882		2.15441
			15	4.27916	3.30724	1.74136	0.485961	5.6763										3.19249	2.5378	4.13742	4.90686	2.00459	5.93277	5.22408	4.15767	2.91577	2.76728	4.45464	1.8561	3.82019	3.79995	3.98893	7.16118	3.73084		1.91915
			16	4.19816	4.40065	1.56587	4.30616	4.73812										3.59746	0.256479	2.80103	3.91469	0.452214	1.51188	4.62338	3.40173	0.317225	1.31614	2.05184	1.37014	3.09125	3.38823	0.742441	6.04752	2.76631		1.42299
			17	5.82478	1.99784	2.34206	2.76728											5.48056	1.2014	1.31614	3.10475	0.425216	0.344222	4.85286	2.51755	0.539957	1.59287	0.539957	2.88202	1.54563	2.16658	0	3.7122	2.25769		1.16136
			18	1.91685	0.708693	1.2284	1.97084											1.65362	1.34314	0	1.2284	0	0	2.16658	1.95059	0.310475	3.06425	0.404968	0	0.6277	1.9371	0.337473	0.944924	1.0897		0.560542
			19	1.33639	2.05184	1.05292	0.742441											3.7122	0.114741	0.202484	0.141739	0.458963	0.141739	0.688445	0	0.141739	2.82802	0.283477	0	0	2.20032	0.0539957	0.600702	0.837608		0.430866
			20	3.01701	4.44789	0	0											0.830184	0	0	0	0.944925	0	0.310475	0.256479	0	3.67171	0.168737	0.823434	0.0809935	2.13283	0.857181	0.796436	0.916914		0.471661
			21	0.600702	3.57046	0.965173	0											0.735691	0	0.344222	0	0.168737	0	0	0	0.884179	3.90794	0	0.425216	0.830184	1.34314	0.398218	3.34098	0.875742		0.450482
			22	0.344222	3.28699	1.03267	0											1.22165	0	1.00567	0.99892	0	0.283477	0	0	0	0.742441	0.202484	0	0	0.087743	1.68737	5.33207	0.811285		0.417325
			23	0.485961	2.20707	0.344222	0											2.16658	0	0.398218	0	0.202484	0.654698	0	0	0.6277	0.114741	0	0.087743	0.283477	2.82127	4.19141	4.47489	0.953024		0.490235
													may
				1	2	3	4	5	6	7	8	9	10	11	12	13	14	15	16	17	18	19	20	21	22	23	24	25	26	27	28	29	30	31	AVERAGE
			0	4.14417	2.74028												0.0269978	2.34206	0	0.857182	0.850432	0.546706	2.17333	1.74136	0.283477	3.59071	3.7122	2.11258	2.20707	1.97084	1.14741	0.742441	0.404968	0.715443	1.61548	0.5144	0.831005
			1	4.04968	3.73245												0.141739	0.742441	1.37014	0.600702	0.512959	0.0607451	0	3.10475	0	1.62662	5.56156	0.971922	1.94384	1.07991	1.37014	1.48488	0.202484	1.68062	1.51188		0.777711
			2	4.58963	2.56479												0.344222	2.45005	1.66037	1.62662	0	1.11366	1.53888	3.05751	1.76836	2.51755	5.50756	2.20032	2.63229	2.08558	0.485961	0.317225	0	0.344223	1.84024		0.94662
			3	1.8831	1.82235												0.141739	1.22165	0.938175	1.2554	0.573704	0.452214	0	1.02592	0.938175	4.10367	4.4209	1.99784	1.68062	1.47813	2.51755	0.263229	0.229482	0.661447	1.38026		0.710008
			4	2.56479	1.53888												0.398218	0.823434	0.398218	0.114741	1.57262	0	0	0.512959	1.68062	2.28132	2.63229	1.84935	0.917926	0.0269978	3.22624	0	0	1.42414	1.09814		0.564882
			5	5.02835	1.56587												0.141739	0	0	1.8561	1.2554	1.45788	0	2.02484	4.05643	6.31749	3.05751	0.404968	1.88985	0.938175	1.3094	0	0	1.74136	1.65227		0.849927
			6	2.59854	1.65362												1.79536	1.10691	1.8291	1.42414	0.256479	0.141739	3.1655	2.11933	2.99676	4.67063	3.52997	0	3.7932	1.57262	0.742441	0.344222	1.19465	3.25324	1.90942		0.982207
			7	2.19357	0.283477												2.5108	4.69762	0.911177	2.22732	0.715443	0.512959	1.99784	3.1655	2.59179	3.96868	1.82235	0.317225	3.98218	0.512959	2.28132	0.317225	0.681696	3.64471	1.96679		1.01172
			8	3.03051	1.96409												5.6763	5.0216	0.971922	4.44789	0.654698	0	3.73245	3.22624	2.57154	2.5378	1.8831	2.62554	5.78429	3.88094	3.79995	2.82127	0.519708	3.42198	2.92859		1.50647
			9	4.85286													1.53888	2.99001	1.99784	6.25	3.36798	0.0269978	4.91361	4.76512	3.53672	5.87878	2.74028	3.87419	6.21625	5.36582	5.79779	4.87986	2.16658	3.93494	3.95234		2.03308
			10	5.42657													3.01701	4.4209	2.90902	4.3399	3.98893	0.512959	4.67738	6.02727	3.61771	5.89903	2.74028	0.769438	4.75837	6.84395	5.93952	3.44897	2.33531	5.84503	4.07987		2.09869
			11	5.68305													3.22624	4.04968	3.65146	4.13742	2.79428	2.79428	4.33315	6.53348	2.61879	6.05427	2.5108	1.77511	3.71895	5.45356	5.56156	3.62446	2.76053	3.93494	3.95874		2.03637
			12	6.20275												2.07546	2.00459	4.02268	3.50972	3.57046	2.65254	3.62446	3.88094	4.81911	1.57262	5.79779	2.22057	2.13958	3.07775	4.3939	5.96652	2.90902	3.48272	2.24757	3.50854		1.80479
			13	3.61771												3.34098	3.0845	4.33315	3.17225	1.8831	2.15983	3.94168	3.38823	3.90794	1.53888	5.25783	2.63229	3.62446	2.77403	3.62446	5.56156	3.55697	2.27457	2.36906	3.30217		1.69864
			14	3.70545												3.7392	2.79428	3.25999	4.88661	3.07775	2.24757	2.88202	3.30724	1.8831	2.09233	4.82586	2.08558	2.93602	2.38931	3.7392	5.89903	2.4568	4.82586	1.79536	3.24143		1.66739
			15	2.68628												3.79995	1.39714	3.44897	5.30508	4.63013	1.59962	2.4568	4.59638	1.37014	1.37014	4.67738	2.85502	3.40173	3.1115	4.3669	5.89903	3.10475	4.87986	2.11258	3.35347		1.72502
			16	2.67954												2.28132	3.30723	3.19249	3.05076	4.07667	0.944924	1.94384	2.22057	0.911177	0.344222	2.36231	2.59179	0.168737	1.99784	4.65038	5.19033	3.13175	4.50189	1.2824	2.54151		1.30735
			17	3.39498												1.48488	3.42198	2.22732	0	1.8291	2.91577	0.431965	1.14066	1.48488	0.742441	0.992171	1.08666	3.70545	3.85394	5.45356	3.90794	4.79212	2.76728	0.404968	2.3019		1.1841
			18	0.141739												1.8291	2.25432	3.21274	0.141739	0.344222	1.45113	0	1.68062	1.07991	0	1.97084	2.22732	0.661447	3.50972	4.50864	1.8291	2.02484	1.57937	1.2824	1.58646		0.816075
			19	0.708693												0.087743	0.654698	2.19357	0.917927	1.42414	0	0.715443	0	3.92819	1.45788	4.01593	4.38715	0	0.0269978	4.48164	2.59854	0	2.42306	1.2554	1.56385		0.804444
			20	1.14741												2.05859	2.67954	2.94276	2.22732	0.742441	0	1.62662	0.202484	1.48488	3.50972	1.28915	4.16442	0.202484	0.202484	0.708693	1.80211	0.087743	2.65254	1.68062	1.5706		0.807916
			21	0.141739												1.2284	3.21949	0.37122	0	0.573704	0.168737	0.485961	0.317225	0	4.21841	0.539957	2.59179	0	1.05967	2.62554	2.96976	0.485961	0.087743	2.99001	1.20377		0.619217
			22	1.34314												0.803186	0.99892	0.573704	0	0.344222	0.0269978	2.33531	0	0	2.10583	4.25216	1.99784	0.0269978	0.37122	3.56371	3.05076	0	0.519709	2.54455	1.24291		0.639354
			23	2.36906												0.398218	1.40389	0.600702	1.42414	0	0.114741	0.229482	0.398218	0.202484	1.8561	5.17009	1.39714	1.16766	1.8561	0.344222	0.6277	0	0	0.776188	1.01681		0.523045
				JUNE
				1	2	3	4	5	6	7	8	9	10	11	12	13	14	15	16	17	18	19	20	21	22	23	24	25	26	27	28	29	30	AVERAGE
			0	1.8561	0	0.114741	0.37122	0.742441	0	0.884179	4.4209	3.07775	1.54563	2.90902					1.3094	0.37122	1.42414	0.344222	0.573704	0.796436	2.11258	0.141739	0.37122	2.11933	0	4.56264	0.688445	0	0.796436	1.21283	0.5144	0.623878
			1	1.37014	0.431965	0.283477	0.398218	0	0	0.398218	1.33639	4.13742	0.283477	1.53888					0.344222	0	0	0.256479	2.05184	0	2.65929	0	0	2.11258	1.16766	3.59746	0	0.398218	2.39606	0.967769		0.49782
			2	2.42306	0.168737	0.256479	0	0	0	0	0	3.21949	0	0.425216					0.539957	0.141739	0.283477	0	0.546706	0	6.16226	0.37122	0.114741	0	2.22732	0.0607451	0.99892	0.661447	5.90578	0.942588		0.484867
			3	2.43655	0	0.823434	0.485961	0	0.202484	0	1.22165	1.16766	0	0					0.573704	1.3094	1.28915	0.0539957	1.79536	0.404968	9.19276	0	0.485961	0.485961	0	0	0.857181	0	5.5683	1.09056		0.560983
			4	0.485961	0.688445	0	0.256479	0	0	0	3.05076	1.05292	0	0					0	0.742441	1.2014	0	1.16766	0.283477	6.01377	0	0.0269978	0.485961	0.202484	0	0.0269978	0.938175	5.93278	0.867565		0.446276
			5	0	1.39714	0	2.36906	1.70761	0	0.0269978	1.56587	1.07991	1.45113	0					0	1.02592	1.11366	0.0269978	1.97084	1.2824	7.10718	0	0.398218	0.971922	0.978672	0.398218	0	0	6.25	1.19699		0.615732
			6	0	2.76053	0.0269978	0.37122	1.28915	0	1.19465	1.42414	0.317225	0.175486	0					0.566955	0.425216	2.94276	1.11366	0.344222	3.32748	8.93629	0.087743	0	2.84827	2.20032	2.11258	0.141739	0.6277	3.34098	1.40674		0.723629
			7	0	2.24757	0.492711	0.485961	0.0539957	0	0.6277	0.830184	0	1.3094	0					0.971922	2.67954	4.4209	2.30832	2.67954	5.16334	10.5359	1.2554	2.71328	3.59071	3.01701	2.51755	2.20032	0.600702	2.53105	2.04742		1.05319
			8	2.07883	3.53672	1.68737	0.404968	0.715443	1.14741	0.425216	1.42414	0.425216	3.65146	1.08666					1.39714	1.94384	4.13067	1.77511	3.90119	6.73596	9.65173	4.78537	3.7257	3.34098	4.78537	3.99568	1.9101	3.1655	3.57046	2.89993		1.49172
			9	2.84827	4.85286	3.1655	1.62662	3.61771	0.99892	2.42306	4.27916	0.519709	3.15875	0.769438					2.62554	3.82019	3.67846	2.36231	2.31506	6.91145	8.32883	3.09125	2.14633	1.97084	5.52781	3.56371	3.7797	5.05535	5.21733	3.40978		1.75399
			10	4.87986	3.10475	2.42981	3.54347	1.68062	2.11258	2.5243	3.59746	1.74136	3.00351	1.45113				2.69978	3.7932	3.84719	2.57154	2.00459	2.37581	7.12743	6.41874	1.64687	1.46463	2.68629	4.36015	1.80211	3.53672	3.21949	5.96652	3.17		1.63065
			11	5.00135	2.57154	1.65362	3.50972	0.99892	3.19924	2.88202	2.82802	2.22732	2.02484	2.02484				2.5648	2.70653	3.82694	1.97084	3.07775	2.82802	5.68304	6.25	1.39039	2.46355	4.22516	3.10475	4.21841	3.02376	1.68062	5.25108	3.081		1.58487
			12	3.92819	3.03051	2.19357	3.62446	2.84827	2.40281	2.4838	2.5378	1.93709	3.85394	2.82127				1.91685	4.30616	3.38823	2.22732	4.45464	3.82019	6.16226	7.48515	3.28699	2.07883	3.10475	2.82127	3.87419	2.67954	3.25999	4.53564	3.37273		1.73493
			13	3.34098	2.11258	3.05751	4.15767	2.5378	0.776188	2.45005	2.39606	2.90902	2.94277	3.94168				3.19249	2.67954	1.97084	1.8561	4.65038	1.57262	7.84962	6.41874	2.4703	3.05751	0.688445	1.77511	4.93386	1.51188	2.90902	3.28024	3.01626		1.55156
			14	2.70653	1.17441	3.03051	3.68521	1.60637	0.857181	2.5378	1.59962	2.76728	2.57154	3.21949				3.21949	3.30724	3.7392	3.56371	5.19034	3.07775	6.78996	6.68197	1.8561	1.3094	1.02592	1.87635	2.33531	1.45113	2.53105	3.39498	2.85577		1.46901
			15	3.57046	1.02592	2.67954	1.9101	3.42873	2.40281	2.36231	2.11258	4.13067	2.73353	4.13404				4.67738	3.50972	3.14525	3.40173	5.41982	2.22057	7.4784	5.21733	0	0.0607451	3.62446	1.53213	3.07775	2.5108	2.22732	3.73245	3.04913		1.56847
			16	2.68629	0.796436	2.42306	0.485961	3.1385	0.37797	1.19465	4.42765	3.07775	3.36123					0.884179	1.2014	7.87662	3.7392	3.90794	0.404968	5.99352	2.90902	0	0.168737	4.3534	4.79212	2.05184	2.36231	1.02592	3.40173	2.57855		1.32641
			17	1.63337	4.76512	2.28132	0	3.62446	1.61987	1.28915	3.64471	1.39714	2.64579					0.404968	0	2.65929	2.4433	0.539957	0.0607451	2.5648	2.16658	4.56264	0.715443	0.857181	3.38823	0.823434	2.36906	2.05184	3.92819	2.01679		1.03744
			18	0.114741	2.82127	0	0	2.28132	0.344222	0	0.830184	2.25432	5.50756					1.31614	0.742441	4.02268	0.256479	2.65254	0.168737	0.661447	2.40281	2.30832	4.87311	3.44897	0.6277	0.796436	0.944924	2.65254	2.4568	1.71099		0.880132
			19	0.398218	2.5108	0.256479	0.600702	0.087743	0.0269978	1.02592	0.087743	1.56587	0.796436					0.512959	0	1.83585	0.573704	1.94384	0	0.168737	0.742441	1.99784	1.43089	3.7122	0	0	0	3.25999	0.0607451	0.907543		0.46684
			20	0	1.8831	0.0607451	0	0	1.26215	6.10826	2.84827	0.256479	1.07991					2.08558	1.45113	1.8831	0.600702	0.911177	0.141739	1.14741	0.0607451	0.938175	0.938175	2.77403	0	1.8291	1.02592	0.283477	0.256479	1.14715		0.590093
			21	0.0269978	1.34314	0.202484	0.0269978	0	0.256479	3.58396	3.92819	0	4.45464					4.3399	2.08558	2.59854	1.02592	1.68062	0	0.539957	0.256479	0.546706	1.51188	4.36015	0.971922	1.97084	0.857182	0.398218	3.33423	1.55004		0.79734
			22	0.431965	0.884179	0.37122	0.175486	0	0.0607451	3.05076	2.76728	0.823434	2.67954					1.31614	0	1.9371	0.425216	1.9371	0	2.85502	1.03267	1.07991	0.796436	1.99784	0.168737	1.3094	1.3094	0	2.54455	1.15208		0.59263
			23	0.485961	2.10583	1.39714	0	0	0.087743	3.84719	3.24649	1.11366	1.28915					1.80211	0	1.3094	0.830184	1.19465	0.458963	4.13742	0.485961	0.823434	0.512959	0.796436	3.75945	0.661447	1.78186	0.769438	3.45572	1.39818		0.719222
				JULY
				1	2	3	4	5	6	7	8	9	10	11	12	13	14	15	16	17	18	19	20	21	22	23	24	25	26	27	28	29	30	AVERAGE
			0	6.64822	0.229482	1.96409	3.88769	6.62122	0	0.539957	2.54455	0.485961	0.229482	2.25432	3.1115	0.803186	0.661447	0.458963	3.25999	1.48488	0	3.1655	2.79428	0.344222	4.71112	3.74595	9.22651	2.27457	3.99568	2.34206	1.74136	0.769438	0.796436	2.36974	0.5144	1.21899
			1	4.90686	0.263229	0.917926	4.91361	5.53456	0.283477	0.776188	5.22408	2.20032	2.19357	1.2014	0.944924	0.141739	0.37122	0	3.91469	1.62662	0	1.53888	1.9371	0.0539957	3.33423	3.53672	9.07127	3.47597	3.7662	2.71328	1.62662	0	0.654698	2.23745		1.15094
			2	0.256479	1.39714	1.05967	3.73245	4.56938	0	4.9946	6.38499	1.02592	1.68062	2.88202	0.600702	0.0539957	2.07883	0	2.13958	0	0.37122	3.1115	2.5108	0	2.64579	3.7122	7.41766	1.39714	4.58963	3.88094	0.512959	0	0.283477	2.10966		1.08521
			3	0	0.398218	0.971922	2.61879	4.10367	1.62662	6.02727	6.78996	1.2284	3.85394	2.76728	1.02592	0.6277	0.600702	0.398218	1.34314	0	0	4.33315	3.34098	0	0.99892	3.48272	8.30184	0	4.27916	3.28024	1.2284	0	0.971922	2.1533		1.10766
			4	0.688445	0.344222	0.202484	2.4568	7.78888	1.46463	4.08342	6.16226	2.45005	3.50972	3.36123	0.485961	0.769438	1.43089	2.05184	0.6277	0.0269978	0	2.5108	1.71436	0.344222	2.91577	3.36798	7.30292	1.9371	3.67846	3.34098	2.87527	0	0	2.26309		1.16414
			5	1.87635	0.715443	1.17441	1.80211	6.54023	0.668196	1.02592	4.11042	1.2284	1.74811	3.33423	3.7932	0.0269978	0.917927	2.70653	0.425216	0.222732	0	1.16766	2.96301	1.07991	4.79212	2.71328	6.70896	3.7932	3.88094	2.25432	0.857182	0.283477	0	2.09368		1.07699
			6	0.283477	1.07991	3.73245	2.34206	5.45356	0.654698	2.14633	2.22732	3.79995	1.31614	4.04968	2.22732	0.087743	3.02376	0.344222	0.546706	0	0	1.33639	0.938175	0.6277	5.38607	4.82586	5.98677	2.91577	1.08666	3.1655	0.6277	0	0	2.00706		1.03243
			7	0.465713	1.49163	3.53672	3.32073	4.87311	2.4568	3.15875	3.42198	2.23407	2.37581	2.07883	2.36906	0	2.22732	0.857181	2.19357	0	0.256479	2.28807	1.62662	1.14066	5.27808	4.04968	5.79104	2.62554	0.769438	4.3939	3.98893	0	0	2.30899		1.18774
			8	3.88094	2.90902	3.82019	3.7392	5.07559	5.5953	5.46031	4.54239	3.47597	3.34098	4.11717	2.5378	1.88985	3.38823	4.3129	4.56264	3.53672	2.05859	4.02268	4.97435	4.02943	6.33099	5.33882	4.9946	3.57046	3.39498	5.23083	4.9946	0	0	3.83752		1.97402
			9	4.67063	4.19816	4.14417	4.37365	4.79212	6.2635	7.71463	4.9946	4.05643	4.24541	5.52781	3.53672	3.44897	5.48731	4.9676	6.56048	4.16442	2.99676	3.96868	4.02268	5.16334	5.96652	6.60097	4.08342	4.51539	4.4209	5.17009	5.39282	3.05751	2.93602	4.71472		2.42525
			10	5.13634	5.16334	4.19141	4.07667	5.44006	6.39174	9.29401	5.79779	4.56264	4.70437	5.30508	4.70437	4.50864	5.52781	5.22408	7.77538	3.28699	3.44897	4.79212	5.42657	5.50756	5.5683	6.36474	4.85961	4.3939	4.71112	5.70329	4.92711	3.61771	3.51647	5.13094		2.63936
			11	3.64471	5.79104	3.18575	6.13526	4.73137	7.22867	9.05103	5.76404	4.51539	4.70437	5.6763	6.304	2.59179	5.90578	5.33882	8.30184	3.33423	2.68629	4.58963	4.94735	4.01593	4.33315	6.25675	5.45356	3.57046	3.93494	4.58963	2.62554	1.80211	4.91361	4.86411		2.5021
			12	3.82694	4.13742	1.11366	5.5953	4.68413	5.19033	6.9317	3.36123	4.22516	3.05076	4.25891	4.71112	2.84827	4.05643	4.90011	5.6493	3.24649	2.30832	3.0845	3.22624	3.82019	3.67171	4.98785	2.4568	4.21841	3.7122	4.02943	3.42198	3.17225	3.40173	3.90996		2.01128
			13	2.05859	1.59287	3.07775	4.74487	3.1115	3.1385	5.80454	2.56479	3.87419	3.7392	5.54131	3.79995	2.39606	4.22516	4.30616	4.48164	2.33531	2.20032	3.28024	2.16658	4.08342	3.27349	4.22516	1.41739	3.1655	3.1655	3.96868	4.16442	5.31183	4.10367	3.51062		1.80586
			14	2.88202	1.34314	2.70653	3.62446	3.0845	4.22516	3.32748	2.01809	3.7122	3.23974	5.39282	3.07775	2.56479	4.50864	3.90119	2.67954	3.1385	2.36906	2.28132	1.94384	3.90794	2.96976	4.42765	1.45113	2.51755	3.7392	2.94276	2.17333	4.79887	3.82019	3.15897		1.62498
			15	2.84827	2.39606	1.45788	4.25216	1.8291	1.79536	2.05859	0.661447	2.33531	2.34206	4.3669	2.11258	2.40956	4.84611	3.90794	3.34098	3.91469	2.25432	3.27349	2.59854	4.30616	2.80103	4.22516	1.53888	1.3094	5.76404	3.25324	4.33315	4.62338	4.22516	3.04603		1.56688
			16	2.42306	0.202484	0.769438	4.22516	2.59179	2.57154	4.23191	1.16766	3.39498	2.42306	3.64471	3.48272	0.857181	4.87986	4.01593	3.34098	3.59746	3.50297	3.54347	2.5378	4.11717	1.2554	5.05535	0	0.485961	4.81911	2.5648	0.458963	3.7392	5.13634	2.83455		1.45809
			17	2.13958	3.1385	3.84719	5.93952	2.4838	1.97084	2.4838	0	0.74919	1.07991	2.30157	1.74811	0.796436	3.42873	1.73461	3.44897	2.74028	0.519708	1.2554	0	4.71112	1.33639	4.68413	0.688445	0.884179	2.74028	0.803186	3.05076	2.93602	4.3669	2.26692		1.1661
			18	0	3.05076	4.68413	5.5953	1.11366	0.256479	1.74811	3.42198	4.91361	2.5648	1.59962	0	0	2.88202	0.830184	0.283477	1.17441	0	0	0.823434	6.02052	4.59638	4.71787	2.76728	1.61987	0.256479	0.654698	5.58855	3.02376	1.62662	2.1938		1.12849
			19	3.7392	2.05184	2.68629	5.33882	1.37014	0	2.99001	1.39714	2.30832	1.2554	1.08666	0	2.40281	2.40281	3.04401	3.6987	0	0	0.715443	1.53888	7.78213	5.56156	4.75837	2.68629	3.62446	1.05292	1.2014	6.51323	0.37122	1.99109	2.4523		1.26147
			20	1.9101	0.917926	3.51647	6.33099	2.99676	2.19357	4.65038	1.19465	0.283477	1.9101	0.911177	1.37014	3.1655	0.148488	2.13958	4.27241	0.0269978	0.654698	0.938175	0.425216	6.67522	6.44573	5.93278	4.81236	1.91685	0.485961	0.99892	4.3669	2.02484		2.5385		1.3058
			21	1.14741	0.229482	3.30724	7.62014	1.07991	1.10691	2.20032	0	0.452214	1.8561	3.45572	2.28132	1.42414	3.04401	3.05076	0.398218	0.283477	3.05076	1.8831	0.715443	6.18926	6.37149	7.61339	1.97084	3.41523	0.0269978	1.54563	2.30832	5.0486		2.51988		1.29622
			22	0.458963	2.87527	4.70437	7.62689	0.114741	2.30832	0.364471	0.566955	0.769439	2.33531	1.2824	3.70545	1.84935	4.13742	4.73812	0.6277	1.3094	1.02592	0.431965	0.688445	7.32991	8.61231	8.22084	2.56479	2.65254	0.398218	1.37014	1.48488	2.33531		2.65137		1.36387
			23	0	0.742441	2.25432	7.78213	0.99892	0.398218	0.458963	0.202484	0	1.8831	2.61879	2.31506	2.00459	1.19465	1.06641	1.22165	0.485961	2.90902	3.94168	0.911177	5.96652	6.25	8.34233	1.11366	4.93386	1.68062	2.02484	1.02592	2.80103		2.32856		1.19781
