# Supplementary material for: Determination of the Surface Roughness Parameter and Wind Shear Exponent of Kisii Region from the On-Site Measurement of Wind Profiles
Source: Hindawi journal article supplement (doi:10.1155/2019/8264061), 2019-07-01
Supplement: f1 [file 8264061.f1.zip › 8264061.f1/NYAMECHEO B ANALYSIS 2.xlsx]

## Sheet: Sheet1
		APL
		1	2	3	4	5	6	7	8	9	10	11	12	13	14	15	16	17	18	19	20	21	22	23	24	25	26	27	28	29	30	AVERAGE
	0	0.661447	1.97759	2.97651	1.54563	0.566955											0.911177	0	1.94384	0.37122	0.742441	0.803186	0	0.344222	1.34314	0.512959	0	0	0.857181	7.67414	0.290227	1.17609	0.5144	0.604982
	1	0.823434	1.68737	1.43089	1.2554	0.803186											1.68062	0	0.283477	0	1.68736	0.715443	0	0.141739	2.19357	1.91685	0.404968	0	0.573704	6.13526	3.19249	1.24629		0.64109
	2	0.600702	1.31614	2.63229	1.20815	0.607451											0.971922	0	0	0	2.28132	1.17441	0	0	0.944924	1.8291	0.742441	0.431965	0	5.25783	4.36015	1.21794		0.626508
	3	1.91685	1.76836	4.9946	1.14741	2.42306											2.33531	0	0	0	1.00567	0.0607451	0	0	0	3.33423	0.256479	0	0	4.27916	2.77403	1.31479		0.67633
	4	1.39714	2.65254	5.39282	0.0539957	0.830184											2.36906	2.25432	0	0.458963	0.803186	0.681695	0.141739	0	0.6277	3.22624	2.71328	0	0	2.5378	1.77511	1.39579		0.717994
	5	3.89444	1.70761	4.09017	1.68737	1.8561											2.96976	0	0	0	1.28915	0	1.02592	0	1.42414	2.28807	1.14066	1.45113	3.93494	3.40173	0.573704	1.63674		0.841941
	6	2.06533	3.57046	3.54347	0.290227	3.59746											1.42414	0.971922	0	0	1.66037	0.202484	0.6277	0	0.0269978	0	1.09341	0.37122	2.31506	3.36123	2.17333	1.36474		0.702023
	7	3.30049	4.04293	4.79212	3.17225	1.2554											0.202484	2.06533	0	0	1.66037	0.600702	0.6277	0	0	0.425216	2.45005	1.10691	2.16658	4.41415	2.07883	1.71808		0.883778
	8	2.49055	4.01593	5.82478	4.77187	0.600702											0.688445	0.539957	0	0	2.57829	0.175486	0.803186	1.48488	1.17441	1.62662	0.74919	3.70545	2.79428	7.42441	5.51431	2.34814		1.20788
	9	5.73029	4.9946	6.99244	3.96193	0.911177											1.71436	2.41631	2.5378	3.32748	1.8561	3.10475	1.08666	0.688445	3.30724	4.00243	2.61879	5.00135	6.48623	4.65038	5.39957	3.53942		1.82068
	10	4.54239	6.41874	6.277	2.51755	0.978672											3.88094	4.16442	4.25216	2.57154	3.77295	5.90578	2.4568	2.54455	3.34098	5.19033	3.03051	4.54239	5.48056	6.06102	6.50648	4.22179		2.17169
	11	3.28024	6.02052	5.79104	2.96301	0.688445											4.91361	4.47489	4.91361	3.7662	5.13634	4.67738	3.50297	3.50972	3.53672	2.31506	3.90794	2.24757	6.13526	6.67522	7.81587	4.31358		2.21891
	12	2.68629	4.9676	3.44222	3.25999	2.62554										5.88553	5.5683	4.3939	5.39282	3.44897	4.53564	4.30616	5.79779	4.9946	3.50972	5.38607	4.67738	4.22516	4.87986	6.95869	9.24676	4.7709		2.45415
	13	4.67063	3.85394	2.76728	5.73704	3.50972										4.30616	5.6493	6.02052	6.76296	4.53564	5.31183	5.27808	3.84719	4.45464	4.67738	4.73137	6.25	3.37473	4.42765	6.35799	9.55723	5.05149		2.59849
	14	5.93953	4.36015	1.43089	3.65821	5.77754										5.79779	5.27808	7.28267	6.13526	3.82694	4.97435	5.30508	4.27241	4.11042	1.82235	4.3939	5.51431	2.14633	3.30724	7.34341	8.20734	4.80401		2.47118
	15	5.30508	4.08342	2.68629	0.776188	6.44573										3.38823	3.53672	4.87986	5.36582	2.07883	6.45248	5.89903	4.87986	3.44897	3.47597	4.67738	2.36906	3.88094	4.9946	4.38715	8.99028	4.38104		2.25361
	16	4.19141	5.07559	2.16658	4.78537	6.8237										4.16442	1.31614	3.28024	4.61663	0.917927	3.1115	5.58855	4.16442	0.519708	2.13958	2.22057	1.70761	3.15875	3.65146	1.51863	7.24892	3.44608		1.77266
	17	7.39741	2.56479	3.48272	2.88202											5.79104	2.57154	1.65362	3.38823	1.39714	1.2014	4.71112	3.28024	1.19465	2.47705	0.917927	3.30049	2.47705	2.5108	0.715443	4.81911	2.93669		1.51063
	18	2.65254	0.857182	1.8291	2.59854											2.65929	2.86177	0	2.34206	1.2014	0.654698	3.07775	1.65362	0.431965	4.11042	0.600702	0.404968	0.398218	2.71328	0.715443	1.9236	1.68433		0.866418
	19	2.13283	2.80103	1.19465	1.14066											4.58963	0.884179	1.08666	0.661447	0.911177	0.600702	0.944924	0	1.14066	3.19924	0.398218	1.03267	0	2.26107	0.202484	1.28915	1.32357		0.680844
	20	4.05643	5.48056	0.938175	0.0269978											1.9101	0	1.97084	0	2.47705	0.256479	0	1.2284	0.74919	4.53564	0	1.17441	1.54563	3.01701	1.34314	1.71436	1.62122		0.833956
	21	1.68062	3.7932	1.62662	0											1.68737	0.600702	1.97084	0.290227	1.11366	0.742441	1.11366	0.688445	2.03159	3.88094	0.688445	0.857181	1.2284	1.48488	1.91685	3.42198	1.5409		0.79264
	22	1.59962	3.28024	2.36906	0											1.8291	0	1.22165	2.05859	1.53888	1.2014	0.776188	0	0.539957	1.56587	0.803186	0	0.087743	0.431965	2.96301	6.10826	1.41874		0.729798
	23	1.53888	2.79428	0.803186	0.114741											2.27457	0.911177	1.9101	0.911177	0.539957	1.2554	0	0	0	1.14066	0	0	0.087743	3.50972	5.50756	5.45356	1.43764		0.739519
		MAY
		1	2	3	4	5	6	7	8	9	10	11	12	13	14	15	16	17	18	19	20	21	22	23	24	25	26	27	28	29	30	31	AVERAGE
	0	4.50864	3.05076												0	3.02376	0	0.573704	0.654698	1.78861	2.76728	1.82235	0.99892	3.39498	4.38715	2.45005	2.88877	3.24818	1.86285	1.57262	1.05967	2.36906	2.1211	0.5144	1.09109
	1	4.40065	4.40065												0	0.37122	0.458963	0.141739	0.0269978	0.37122	0.175486	3.64471	0	2.82127	5.96652	1.45788	2.30832	2.13958	1.74811	1.71436	0.654698	1.72111	1.72617		0.887944
	2	4.87986	3.31398												0	2.5378	2.13958	0.857181	0	1.27565	1.11366	4.36015	0.600702	2.61879	6.2365	3.28024	2.61879	1.60637	1.49163	0.715443	0.803186	0	2.02248		1.04036
	3	2.90902	2.42306												0	1.05292	0.344222	1.45113	0.283477	1.43089	0.573704	1.80211	2.11258	4.41415	4.07667	2.4838	3.25324	2.39606	2.65929	0.74244	0.087743	0.99892	1.77477		0.912942
	4	2.63229	2.79428												0	0.425216	0	0	1.8291	0.141739	0.0539957	0.256479	1.53888	3.54347	3.65146	2.71328	1.14066	0.141739	3.30724	1.14741	0.0607451	3.25324	1.43156		0.736395
	5	5.30508	1.97084												0	0	0	0.742441	0.708693	2.05184	0.431965	3.1385	5.01485	6.33774	3.28024	0.539957	2.76728	1.41739	1.26215	0.857182	0.99892	2.38931	1.96072		1.00859
	6	3.20599	2.80778												2.02484	0.573704	0.944924	2.62554	1.02592	0.924676	2.88202	3.1115	3.63121	6.22975	4.07667	0.600702	5.08234	2.62554	2.13958	0.688445	1.51188	4.21841	2.54657		1.30996
	7	3.19924	0.708693												3.75945	5.07559	0.830184	1.74136	0.485961	1.42414	3.21949	3.1655	2.67279	3.25324	2.13958	0.566955	4.33315	0.978672	2.59854	0.917926	0.938175	4.08342	2.3046		1.18549
	8	3.05751	1.93203												5.08234	5.84503	0.0269978	3.88769	0.485961	1.2284	3.39498	3.28024	3.67846	3.85394	2.4973	2.76728	5.82478	4.21841	4.11042	3.30724	0.735691	3.82694	3.15208		1.62143
	9	5.53456													3.33423	3.82694	1.14066	5.56156	2.62554	0.600702	5.0216	4.74487	3.38148	5.5683	3.96193	4.13742	6.9047	5.87878	6.28375	5.25108	1.39714	4.76512	4.20633		2.16374
	10	7.07343													2.82127	5.19708	2.85502	4.9811	3.62446	0.37122	5.6493	7.33666	4.25216	5.91253	3.59071	1.48488	6.00027	7.19492	6.31075	4.10367	2.39606	5.47381	4.55944		2.34537
	11	6.56722													2.99676	3.65146	3.31398	4.40065	2.96976	2.03159	4.87986	6.98569	3.07775	6.59422	1.91685	2.88202	3.14525	5.93953	7.67414	3.99568	3.19249	3.1385	4.17649		2.14839
	12	7.39741												2.91914	3.50972	4.64363	3.17225	4.19141	3.33423	3.73245	4.19816	5.33882	1.71436	6.46598	2.20032	2.34206	3.22624	5.6223	7.39066	2.30832	2.96976	3.33423	4.00057		2.0579
	13	4.19141												1.94384	2.85502	5.02835	2.90902	1.63337	2.16658	5.31183	4.33315	4.56264	1.91685	6.56722	2.57154	4.10367	2.96976	3.50972	6.44573	2.96301	2.22732	1.8291	3.50196		1.80141
	14	3.48272												3.85394	3.90119	3.56371	5.06209	3.0845	1.79536	3.17225	3.77295	2.57154	2.22057	5.44681	2.09233	3.19249	2.11933	4.56938	6.79671	2.88202	5.31182	1.66712	3.52794		1.81477
	15	2.79428												5.56156	2.22057	4.68413	5.5683	5.13634	1.2554	3.17225	4.36015	2.47705	1.27565	4.73137	2.5378	4.09017	3.05076	4.59638	5.5953	2.33531	5.46031	2.36231	3.66327		1.88439
	16	3.7662												2.57154	2.81452	3.65146	3.54347	5.33882	1.3094	2.4568	3.48947	2.22732	0.917926	2.68629	2.72003	1.40389	2.5108	5.35907	5.92603	2.74028	4.87311	1.84935	3.10779		1.59865
	17	4.11042												1.49163	5.41982	1.84935	1.07991	2.79428	4.27916	0.830184	1.07991	2.24757	0.884179	1.57262	1.14741	3.53672	4.73812	6.68871	3.87419	4.90686	4.50864	1.57262	2.93062		1.50751
	18	1.8831												1.82235	3.13175	2.34206	0	0.600702	1.53888	0.0269978	2.20032	1.51188	0.425216	2.39606	2.77403	0	2.93602	5.58855	3.02376	2.57154	1.65362	2.34206	1.93844		0.997136
	19	1.76836												1.71436	1.53888	1.37014	1.03267	1.53888	0.168737	0	0.546706	4.44789	1.79536	4.88661	4.62338	0	0.99892	6.05427	2.99676	0.458963	2.22732	1.53888	1.98535		1.02127
	20	1.61987												2.38931	3.1385	4.3399	1.50513	1.37014	0	1.62662	1.37014	2.22057	4.22516	1.2824	4.9406	0	0.37122	1.2284	2.4838	0.337473	3.82019	2.59854	2.0434		1.05112
	21	1.68737												2.18682	2.79428	0	0.425216	1.45113	0.573704	1.62662	0.688445	0.256479	4.84611	1.51863	3.28699	0	2.02484	3.19249	3.82019	1.08666	1.14066	3.70545	1.8156		0.933947
	22	1.08666												0.512959	2.31506	0	0.6277	0	1.18116	2.47705	0.796436	0	3.39498	4.52889	3.34098	0	1.43089	3.93494	3.90794	0.600702	1.59962	2.76728	1.72516		0.887423
	23	3.05076												0	0.593952	0.6277	0.857181	0.0269978	0.485961	1.47813	0.74919	0.37122	1.65362	5.6223	2.36231	0.600702	2.62554	1.2554	1.2824	0.398218	0	0.857181	1.24494		0.640396
		June
		1	2	3	4	5	6	7	8	9	10	11	12	13	14	15	16	17	18	19	20	21	22	23	24	25	26	27	28	29	30	AVERAGE
	0	2.05859	0.573704	1.67387	0	0.654698	0	1.65362	4.87311	3.40173	1.27565	3.1385					2.73353	1.45788	2.78753	0.688445	1.14066	2.00459	3.40173	1.02592	0.344222	2.90902	0.37122	4.68413	1.14741	0.229482	1.49163	1.75849	0.5144	0.904569
	1	2.4568	1.2554	1.22165	0.99892	0	0	0.519708	2.20032	4.76512	0.310475	1.88985					1.79536	0.539957	0.310475	0.168737	2.74028	1.37014	5.13634	1.34314	0.600702	3.05751	1.3094	4.91361	0.830184	0	2.79428	1.63571		0.841407
	2	3.30724	0.344223	0.229482	1.40389	0	0	0	0	2.85502	0.37122	1.2284					0.600702	1.59287	0.99892	0.742441	0.890929	0.917927	7.24892	1.02592	1.14741	0	2.96976	0.978672	2.36231	0.485961	7.53915	1.50928		0.776375
	3	2.80103	0.890929	0	1.76836	0	0	0	1.59962	0	0	0.911177					0	2.74028	2.57154	0.681696	3.18575	0.431965	10.0702	0.863931	0.715443	0	1.00567	0.404968	1.54563	0.890929	6.25675	1.51292		0.778245
	4	0.742441	2.11933	0	0	0	0	0	3.7662	0	1.45113	0.168737					0	1.59962	2.70653	0	2.25432	2.04509	8.51107	0.742441	0.168737	0.398218	0.566955	0.283477	0	1.00567	6.13526	1.33328		0.685838
	5	0.458963	2.62554	0	2.22732	3.42198	0	0	1.97759	0	1.71436	0					0	2.14633	2.65254	1.8291	1.8561	2.22732	7.39066	0.917926	1.59962	1.45113	1.54563	1.11366	0.890929	0.431965	6.84395	1.74318		0.896691
	6	0.0269978	2.59179	0	0.769438	0.0269978	0.485961	1.37014	1.74136	0	0	0					0.74919	0.654697	2.99676	1.56587	0.458963	4.4209	8.67306	0	0.317225	3.50297	1.96409	2.14633	1.68736	0.431965	4.85286	1.59365		0.819774
	7	0.37122	3.0845	0.99892	0.37122	0.114741	0.431965	0.593952	2.13958	0	1.45788	0					1.39714	3.152	5.36582	2.62554	3.04401	7.01944	11.4741	1.45113	3.38823	3.7392	3.42198	2.74028	2.57154	0.917927	1.99784	2.45654		1.26365
	8	3.85394	5.08234	2.17333	0.971922	1.8291	0.573704	0.715443	1.8291	0	3.53672	0.6277					1.68062	2.88877	4.25216	1.65362	3.59071	8.1331	11.1029	5.19034	3.50297	3.61771	5.41307	4.17117	2.82802	2.56479	4.3669	3.31347		1.70445
	9	3.36798	5.42657	3.54347	2.67954	2.74028	0.971922	2.34206	4.08342	0.37122	2.45005	1.48488					2.28132	4.65713	4.3939	2.68629	2.42306	7.56614	9.21301	3.94168	2.05184	2.39606	6.62122	4.08342	4.07667	4.88661	6.91145	3.75581		1.93199
	10	5.19034	1.83585	2.53105	4.3939	1.14066	1.8561	2.70653	4.12392	1.3094	3.1385	1.97084				3.1385	3.7392	4.90686	2.11258	2.59179	2.4568	7.90362	8.61906	1.8291	1.63337	2.85502	4.62338	2.76728	3.59071	3.56371	6.10826	3.43098		1.76489
	11	4.56938	3.34098	2.13958	4.30616	1.48488	2.74028	3.27349	3.99568	2.5108	2.28132	2.20032				2.90902	2.65254	5.10934	2.02484	4.13742	3.19924	6.99244	7.18818	2.33531	2.76728	4.53564	3.1385	5.53456	3.54347	2.80103	5.90578	3.61546		1.85979
	12	4.28591	4.4209	2.36231	3.62446	4.18467	2.22732	2.80103	2.5378	1.59287	4.75837	2.85502				2.63229	3.99568	4.53564	2.67954	5.21733	4.68413	7.4514	9.04428	3.96868	2.39606	3.54347	2.91577	4.13742	2.59179	3.64471	4.65038	3.84219		1.97642
	13	3.82694	2.22057	4.08342	5.51431	2.67954	0.992171	3.09125	3.28699	3.44897	4.65038	4.3399				2.79428	3.48272	3.97543	2.27457	4.71787	2.22057	7.39741	6.78996	2.73353	2.72003	0.99892	2.71328	4.70437	1.99784	2.93602	4.27916	3.51372		1.80746
	14	2.20032	1.8291	3.10475	4.50189	1.97084	1.2554	2.34206	2.34206	4.13742	3.53672	3.87419				4.19141	3.84719	4.9676	3.93494	5.64255	3.62446	7.10718	7.89687	1.76836	2.42306	1.71436	1.79536	3.96868	2.14633	3.47597	5.27808	3.51397		1.80759
	15	4.61663	1.28915	3.45572	1.97084	3.45572	2.45005	2.11258	2.62554	5.84503	3.84719	5.07053				5.76404	3.53672	4.25216	4.82587	6.53348	2.39606	9.07802	6.33099	0.425216	0	5.33882	2.82127	2.88877	2.37581	2.82127	3.45572	3.68827		1.89724
	16	2.82802	0.917927	2.74703	0.317225	3.50972	0.229482	0.938175	4.62338	3.90119	4.19141					0.857181	1.82235	8.57181	3.39498	4.4209	1.40389	6.87095	3.33423	0	0.087743	4.56264	3.48272	2.65929	2.82802	2.36906	3.87419	2.87475		1.47877
	17	1.57262	4.3939	2.47705	0.310475	3.46922	0.283477	1.2014	4.65713	2.14633	2.22057					0.769439	0	4.86636	3.39498	1.72111	1.40389	3.48272	2.79428	5.19033	1.14066	1.79536	5.14309	2.4838	2.93602	2.76728	3.98893	2.56194		1.31786
	18	0.485961	3.67171	0.803186	0	2.17333	0	0.175486	1.11366	3.17225	6.41874					1.62662	1.48488	5.66955	1.3094	3.54347	1.40389	1.74811	3.19249	3.07775	5.24433	4.48164	0.830184	0.944924	1.2554	3.05076	3.1385	2.30832		1.1874
	19	0	3.13175	0.485961	1.62662	0.0269978	0	1.36339	0.944924	2.80103	0.37122					1.45788	0.114741	3.1115	2.11258	2.36906	0.539957	1.37014	1.49163	2.07883	1.96409	4.19141	0.202484	0	0	3.70545	1.65362	1.42751		0.734312
	20	0	2.86177	0	0	0	0	7.19492	3.58396	1.49838	2.42981					2.74028	2.10583	2.43655	1.14066	1.76836	1.48488	1.03267	0.971922	1.39714	1.22165	4.9676	0.857181	1.37014	1.2824	1.91685	0.600702	1.72553		0.88761
	21	0	1.96409	1.11366	0	0	0	3.70545	4.24541	0.6277	4.87986					5.07559	2.42306	3.82694	2.11258	2.42981	0.256479	1.8561	0.890929	1.37689	1.80211	4.88661	2.5378	2.99676	1.2554	0.99892	4.04293	2.12712		1.09419
	22	0.512959	2.71328	0.654698	0	0	0	3.41523	3.42198	2.08558	2.82802					1.80211	1.57262	2.65254	1.2824	1.8561	0.202484	3.68521	1.72111	2.08558	1.05292	3.7932	0.600702	1.94384	0.803186	0.256479	2.5108	1.67127		0.859701
	23	1.14066	2.57154	2.05184	0	0.256479	0	4.24541	4.3939	1.39714	1.52707					1.88985	0.857182	2.5108	1.53888	2.05184	1.62662	5.27808	1.71436	1.2284	0.944924	1.47813	3.70545	1.73461	2.5108	1.32289	3.54347	1.98155		1.01931
		JULY
		1	2	3	4	5	6	7	8	9	10	11	12	13	14	15	16	17	18	19	20	21	22	23	24	25	26	27	28	29	30	AVERAGE
	0	7.36366	0.290227	1.84935	4.31965	7.81588	1.11366	1.68062	3.37473	1.86285	1.99784	3.25324	4.36015	1.8561	0.884179	2.05184	3.68521	2.71328	0.37122	3.70545	3.42873	0.485961	3.59071	3.6987	9.13202	2.88202	4.63013	1.97759	2.67954	1.54563	1.97084	3.01903	0.5144	1.55299
	1	5.0486	1.37689	2.37581	5.6223	6.95869	1.05967	1.45788	5.71679	3.30049	3.59746	1.96409	1.39714	0.310475	1.48488	0.830184	4.02943	1.59962	0.087743	2.28132	1.70761	0.512959	3.79995	3.07775	10.2119	3.67846	4.50864	3.7122	1.51863	0.519708	1.65362	2.8467		1.46434
	2	1.05967	2.36906	1.43089	4.33315	5.29833	0	5.33882	7.42441	2.34206	2.65254	3.61771	1.82235	0.661447	2.62554	0.344222	2.42981	0.769439	0.114741	3.61771	3.07775	0.485961	2.30832	4.3399	10.6439	2.19357	5.19708	4.13742	0.425216	0	0.6277	2.72296		1.40069
	3	0.884179	0.485961	2.20032	2.5378	3.65146	0.938175	6.99244	7.90362	2.5108	3.85394	2.30832	1.17441	2.02484	1.76836	1.8831	2.57829	0	0.344222	5.96652	4.08342	1.42414	2.36231	3.25324	9.50999	1.68736	4.50864	4.24541	2.25432	0.404968	2.16658	2.86357		1.47302
	4	1.17441	0	1.16766	3.31399	8.07235	2.17333	4.62338	6.53348	2.80103	3.87419	4.9946	1.17441	1.66037	2.05859	3.47597	1.02592	1.02592	0	2.45005	2.57154	1.74136	3.65821	3.62446	6.93844	2.45005	4.56263	2.99676	2.87527	0.654698	0.600702	2.80913		1.44501
	5	1.97084	1.43089	1.82235	2.86177	7.70113	1.48488	1.54563	3.59746	2.22057	2.62554	3.96193	4.37365	0.512959	1.94384	4.17117	1.37689	2.36231	0	1.79536	3.19924	2.22732	5.24433	3.36123	7.95761	4.56264	4.29941	3.10475	0.911177	1.12041	0.796436	2.81812		1.44964
	6	0.99892	1.47813	4.07667	3.41523	6.42549	2.07883	2.11258	3.53672	4.65038	2.27457	4.15767	3.19924	0	3.42198	0.890929	1.94384	1.43089	0.546706	2.22732	2.25432	2.93602	5.62905	5.17009	6.88445	3.79995	2.14633	4.27241	1.00567	0.938175	0.512959	2.81385		1.44744
	7	2.36231	1.77511	4.50189	3.7392	5.00135	3.02376	3.32073	3.32073	2.76728	2.93601	2.36906	3.39498	0	2.96301	1.2554	2.90902	0.310475	1.2014	3.93494	2.33531	2.13958	7.04644	4.85286	6.223	3.94843	2.90227	4.70437	4.19141	0.654698	1.16766	3.04176		1.56468
	8	4.42765	4.27916	4.14417	4.84611	5.6493	5.85178	6.16226	5.64255	3.1655	4.05643	3.05751	3.84719	2.88202	3.84719	4.27916	4.81237	4.3669	1.9371	4.91361	6.07451	5.00135	6.38499	6.35799	5.02835	3.42198	4.21841	6.50648	5.08909	0.485961	0.317225	4.36848		2.24714
	9	4.90686	5.19708	4.67738	4.11042	5.56156	6.9047	9.90146	5.13634	3.61771	4.9946	6.2095	4.87311	3.0845	5.96652	5.17009	7.96436	4.45464	3.02376	5.0621	4.13742	6.47273	6.70896	6.96544	4.82586	4.3669	4.73137	5.5953	5.6223	3.56372	2.74028	5.21823		2.68426
	10	6.10826	4.93386	4.4209	5.36582	5.42657	7.67414	8.41658	6.8507	4.3399	5.54131	6.14201	5.30508	3.84719	7.10718	6.8237	8.53807	3.40173	3.94843	5.54131	5.64255	5.61555	6.45248	6.38499	5.85178	5.42657	4.82586	5.23083	5.14309	4.01593	4.19141	5.61713		2.88945
	11	3.90794	5.81803	4.11717	6.304	5.56156	7.86987	8.97003	5.53456	4.79212	4.3939	5.6223	6.54698	2.39606	6.18926	5.10934	8.1601	2.4568	3.1655	5.41307	3.6852	5.31857	5.06884	5.6763	5.01485	4.73812	4.50864	5.60205	2.10583	1.8831	5.79779	5.0576		2.60163
	12	4.19816	5.14309	2.20032	6.39174	5.0216	5.90578	7.64714	3.39498	4.08342	2.70653	4.79212	6.45248	2.71328	4.9676	6.223	6.76296	2.85502	2.13958	3.42198	3.03051	4.50864	4.68413	5.48056	3.04401	4.3129	4.27916	4.88661	4.3399	3.77295	5.18359	4.48479		2.30698
	13	3.05076	1.40389	3.03051	6.36474	4.08342	3.88094	6.50648	3.31399	4.27916	3.98893	6.64147	4.84611	3.28024	4.29941	4.67738	5.5683	3.1385	3.56371	2.90902	2.88202	3.96868	4.63013	4.21841	2.08558	3.098	2.94276	4.53564	3.87419	5.5683	4.3129	4.03145		2.07378
	14	3.53672	2.38931	2.96976	3.96193	4.27916	3.7662	2.80103	2.73353	4.30616	4.19141	6.277	2.33531	2.80103	4.77187	5.01485	3.1115	3.28699	2.05184	3.1385	3.02376	4.44114	2.74703	4.68413	1.82235	2.5378	5.27808	3.59746	4.08342	4.79887	4.71112	3.64831		1.87669
	15	2.51755	2.85502	1.8831	4.65713	2.99676	3.0845	2.17333	0.978672	2.90902	2.67954	4.87986	2.5648	2.13283	5.98677	4.50189	3.25324	4.9676	2.94276	3.18575	3.25324	4.90686	2.65929	4.81911	1.74136	1.80211	5.92603	4.3939	3.57046	5.0486	4.71787	3.4663		1.78306
	16	3.24649	0.229482	0.600702	4.56264	3.61771	2.77403	3.65146	1.51188	3.7392	2.88202	4.29941	3.93494	0.37122	5.44681	5.33207	3.19924	3.90119	3.36798	3.65146	2.00459	4.27916	1.59962	5.77079	0.884179	1.60637	5.70329	3.87419	0.539957	4.24541	6.10826	3.23119		1.66212
	17	2.13958	5.87878	2.28132	7.04644	3.21949	1.86285	3.1385	0.431965	1.16766	1.59962	3.1115	2.31506	1.72111	3.7392	2.03159	4.25216	4.61663	1.67387	1.65362	0.512959	6.48623	2.68628	6.01377	0.708693	2.00459	3.59746	1.14066	3.19924	4.22516	5.42657	2.99609		1.54119
	18	0.202484	2.88202	6.07451	6.223	1.16766	0.458963	2.53105	5.0216	6.10151	3.03051	2.05859	0	0.600702	3.31399	0.708693	2.54455	2.11258	0.600702	1.03267	1.16766	6.94519	5.19033	5.6763	3.44897	2.5378	1.05292	1.54563	5.39282	3.40848	2.65254	2.85615		1.4692
	19	3.85394	3.02376	3.24649	6.72921	1.2824	0.938175	3.42198	2.05859	3.48272	2.07883	1.77511	0.857181	2.16658	3.28024	3.39498	3.67846	0.344222	0.263229	1.2284	2.22057	8.53807	6.28375	5.70329	3.32748	4.33315	1.76836	1.19465	7.27592	0.917927	2.69978	3.04558		1.56665
	20	2.26107	1.16766	3.62446	5.76404	2.31506	2.11258	5.19708	1.69411	1.11366	2.33531	2.28132	3.05076	3.91469	0.971922	3.67846	5.19708	0.283477	1.76836	1.8831	1.62662	7.59314	7.20167	8.0791	4.9676	3.25324	0.6277	1.79536	4.4209	3.7392		3.23858		1.66592
	21	1.97084	1.8291	4.76512	8.04536	2.67954	0.708693	3.0845	1.07991	2.05859	2.5108	3.99568	2.99001	2.47705	3.86744	3.6852	2.4838	1.03267	2.90902	1.59962	0.141739	7.79563	7.36366	7.67414	2.76728	4.06992	0.978672	3.1115	2.42981	5.76404		3.30584		1.70052
	22	1.05292	2.61879	5.5953	7.81587	1.2824	3.21274	1.14741	1.14066	1.39714	2.82127	1.54563	4.19142	2.11258	5.31857	4.68413	1.53888	2.13958	1.76836	0.938175	2.25432	8.7878	8.88229	9.50324	2.85502	3.0845	1.12716	1.69411	2.31506	3.05076		3.30607		1.70064
	23	1.2014	0.512959	3.73245	8.1061	1.39714	1.19465	1.51188	1.05292	1.2554	1.94384	2.73353	2.76053	2.11258	2.33531	2.54455	1.2284	1.10691	4.19141	4.65038	1.97084	6.64822	6.45248	10.2457	1.2554	5.00135	3.30049	2.88202	1.68737	3.10475		3.03865		1.56308
